# Supplementary material for: Characterization of immature ovarian teratomas through single-cell transcriptome
Source: Front Immunol. 2023 Mar 3;14:1131814. doi: 10.3389/fimmu.2023.1131814 (PMC10020330; doi:10.3389/fimmu.2023.1131814)
Supplement: Supplementary file 1 [file DataSheet_1.xlsx]

## Sheet: supplementary table S1
p_val	avg_log2FC	pct.1	pct.2	p_val_adj	cluster	gene
0	4.95386	0.932	0.072	0	Airway Epi/ciliated cells	CAPS
0	4.94549	0.903	0.02	0	Airway Epi/ciliated cells	C20orf85
0	4.25878	0.882	0.037	0	Airway Epi/ciliated cells	C9orf24
0	4.24252	0.875	0.033	0	Airway Epi/ciliated cells	RSPH1
0	3.71991	0.828	0.035	0	Airway Epi/ciliated cells	PIFO
0	3.68424	0.771	0.028	0	Airway Epi/ciliated cells	C1orf194
0	3.59771	0.796	0.029	0	Airway Epi/ciliated cells	AGR3
0	3.50568	0.803	0.015	0	Airway Epi/ciliated cells	C11orf88
0	3.50425	0.771	0.019	0	Airway Epi/ciliated cells	FAM183A
0	3.47124	0.649	0.01	0	Airway Epi/ciliated cells	AL357093.2
0	3.42362	0.785	0.102	0	Airway Epi/ciliated cells	TPPP3
0	3.38968	0.767	0.006	0	Airway Epi/ciliated cells	SNTN
0	3.33626	0.789	0.046	0	Airway Epi/ciliated cells	C9orf116
0	3.32313	0.652	0.01	0	Airway Epi/ciliated cells	TMEM190
0	3.31024	0.781	0.042	0	Airway Epi/ciliated cells	C5orf49
0	3.29518	0.72	0.029	0	Airway Epi/ciliated cells	TSPAN1
0	3.1193	0.76	0.013	0	Airway Epi/ciliated cells	CAPSL
0	3.03539	0.763	0.059	0	Airway Epi/ciliated cells	FXYD3
0	2.99245	0.717	0.019	0	Airway Epi/ciliated cells	DYNLRB2
0	2.92224	0.523	0.008	0	Airway Epi/ciliated cells	SCGB2A1
0	2.91485	0.728	0.033	0	Airway Epi/ciliated cells	SMIM22
0	2.87798	0.735	0.065	0	Airway Epi/ciliated cells	ODF3B
0	2.81973	0.738	0.023	0	Airway Epi/ciliated cells	ZMYND10
0	2.75952	0.677	0.069	0	Airway Epi/ciliated cells	AGR2
0	2.75403	0.717	0.01	0	Airway Epi/ciliated cells	ROPN1L
0	2.68059	0.72	0.02	0	Airway Epi/ciliated cells	CFAP126
0	2.62266	0.552	0.029	0	Airway Epi/ciliated cells	GSTA1
0	2.60586	0.692	0.014	0	Airway Epi/ciliated cells	MORN5
0	2.60282	0.663	0.019	0	Airway Epi/ciliated cells	CFAP53
0	2.58343	0.699	0.006	0	Airway Epi/ciliated cells	FAM92B
0	2.48977	0.659	0.019	0	Airway Epi/ciliated cells	AC007906.2
0	2.47562	0.652	0.01	0	Airway Epi/ciliated cells	C9orf135
0	2.39129	0.645	0.006	0	Airway Epi/ciliated cells	C11orf97
0	2.38314	0.652	0.007	0	Airway Epi/ciliated cells	CCDC78
0	2.33284	0.513	0.013	0	Airway Epi/ciliated cells	DNAAF1
0	2.30816	0.581	0.042	0	Airway Epi/ciliated cells	LRRIQ1
0	2.29531	0.656	0.054	0	Airway Epi/ciliated cells	SPA17
0	2.26974	0.527	0.017	0	Airway Epi/ciliated cells	TMC5
0	2.26836	0.552	0.005	0	Airway Epi/ciliated cells	AC013264.1
0	2.25915	0.659	0.063	0	Airway Epi/ciliated cells	ELF3
0	2.24653	0.649	0.021	0	Airway Epi/ciliated cells	EFCAB1
0	2.23675	0.624	0.008	0	Airway Epi/ciliated cells	WDR38
0	2.18877	0.631	0.007	0	Airway Epi/ciliated cells	TEKT1
0	2.17965	0.659	0.051	0	Airway Epi/ciliated cells	CLDN3
0	2.17784	0.595	0.039	0	Airway Epi/ciliated cells	CCDC170
0	2.12988	0.631	0.009	0	Airway Epi/ciliated cells	LRRC46
0	2.1245	0.656	0.051	0	Airway Epi/ciliated cells	RSPH9
0	2.11109	0.606	0.01	0	Airway Epi/ciliated cells	FAM81B
0	2.10039	0.523	0.006	0	Airway Epi/ciliated cells	DNAH12
0	2.07589	0.627	0.021	0	Airway Epi/ciliated cells	ENKUR
0	2.06868	0.599	0.004	0	Airway Epi/ciliated cells	FAM216B
0	2.02996	0.62	0.061	0	Airway Epi/ciliated cells	CCDC74A
0	1.97878	0.455	0.008	0	Airway Epi/ciliated cells	CYP4B1
0	1.9731	0.602	0.01	0	Airway Epi/ciliated cells	C22orf15
0	1.92783	0.606	0.047	0	Airway Epi/ciliated cells	NME5
0	1.91873	0.556	0.007	0	Airway Epi/ciliated cells	MS4A8
0	1.91578	0.541	0.019	0	Airway Epi/ciliated cells	FOXJ1
0	1.91084	0.516	0.016	0	Airway Epi/ciliated cells	CDHR3
0	1.8902	0.573	0.025	0	Airway Epi/ciliated cells	PPIL6
0	1.88279	0.602	0.059	0	Airway Epi/ciliated cells	C21orf58
0	1.86896	0.57	0.043	0	Airway Epi/ciliated cells	PLAC8
0	1.86735	0.523	0.008	0	Airway Epi/ciliated cells	TEX26
0	1.85667	0.527	0.043	0	Airway Epi/ciliated cells	SLC44A4
0	1.85572	0.602	0.009	0	Airway Epi/ciliated cells	AKAP14
0	1.85552	0.541	0.003	0	Airway Epi/ciliated cells	LDLRAD1
0	1.84742	0.52	0.019	0	Airway Epi/ciliated cells	CHST9
0	1.82175	0.613	0.054	0	Airway Epi/ciliated cells	CFAP300
0	1.80533	0.559	0.011	0	Airway Epi/ciliated cells	SAXO2
0	1.76764	0.527	0.01	0	Airway Epi/ciliated cells	DRC1
0	1.75684	0.505	0.031	0	Airway Epi/ciliated cells	CCDC113
0	1.75645	0.516	0.005	0	Airway Epi/ciliated cells	FAM166B
0	1.74955	0.559	0.021	0	Airway Epi/ciliated cells	PACRG
0	1.70985	0.516	0.005	0	Airway Epi/ciliated cells	STOML3
0	1.6877	0.491	0.023	0	Airway Epi/ciliated cells	SPAG17
0	1.67611	0.534	0.009	0	Airway Epi/ciliated cells	SPAG6
0	1.67283	0.513	0.006	0	Airway Epi/ciliated cells	TCTEX1D4
0	1.66766	0.556	0.011	0	Airway Epi/ciliated cells	RIIAD1
0	1.66578	0.52	0.002	0	Airway Epi/ciliated cells	TUBA4B
0	1.65893	0.502	0.005	0	Airway Epi/ciliated cells	CFAP73
0	1.64493	0.495	0.003	0	Airway Epi/ciliated cells	CD164L2
0	1.64133	0.505	0.006	0	Airway Epi/ciliated cells	CFAP157
0	1.60951	0.498	0.008	0	Airway Epi/ciliated cells	CFAP45
0	1.60848	0.48	0.02	0	Airway Epi/ciliated cells	DEGS2
0	1.60183	0.541	0.006	0	Airway Epi/ciliated cells	EFCAB10
0	1.60119	0.541	0.01	0	Airway Epi/ciliated cells	TEKT2
0	1.56717	0.53	0.01	0	Airway Epi/ciliated cells	ARMC3
0	1.56199	0.434	0.008	0	Airway Epi/ciliated cells	ERICH3
0	1.56065	0.505	0.023	0	Airway Epi/ciliated cells	PLPP2
0	1.55781	0.538	0.024	0	Airway Epi/ciliated cells	FANK1
0	1.55138	0.487	0.006	0	Airway Epi/ciliated cells	STMND1
0	1.52291	0.491	0.008	0	Airway Epi/ciliated cells	ZBBX
0	1.52034	0.448	0.005	0	Airway Epi/ciliated cells	CCDC17
0	1.51058	0.491	0.002	0	Airway Epi/ciliated cells	ANKRD66
0	1.49983	0.48	0.003	0	Airway Epi/ciliated cells	CATSPERD
0	1.47224	0.495	0.03	0	Airway Epi/ciliated cells	TRIP13
0	1.45756	0.505	0.018	0	Airway Epi/ciliated cells	FABP6
0	1.44801	0.434	0.009	0	Airway Epi/ciliated cells	CCL15
0	1.44438	0.491	0.011	0	Airway Epi/ciliated cells	RIBC1
0	1.43488	0.455	0.013	0	Airway Epi/ciliated cells	NEK10
0	1.43201	0.462	0.015	0	Airway Epi/ciliated cells	HYDIN
0	1.42865	0.498	0.004	0	Airway Epi/ciliated cells	DNAJB13
0	1.42513	0.466	0.014	0	Airway Epi/ciliated cells	RSPH4A
0	1.42365	0.459	0.009	0	Airway Epi/ciliated cells	CFAP43
0	1.42101	0.487	0.008	0	Airway Epi/ciliated cells	DNAH9
0	1.41515	0.498	0.018	0	Airway Epi/ciliated cells	CCDC153
0	1.41215	0.516	0.034	0	Airway Epi/ciliated cells	LRTOMT
0	1.3962	0.491	0.035	0	Airway Epi/ciliated cells	CCDC74B
0	1.39376	0.48	0.003	0	Airway Epi/ciliated cells	LINC01765
0	1.38827	0.466	0.024	0	Airway Epi/ciliated cells	CCDC173
0	1.37992	0.495	0.009	0	Airway Epi/ciliated cells	DYDC2
0	1.37425	0.448	0.01	0	Airway Epi/ciliated cells	CCDC33
0	1.37172	0.423	0.003	0	Airway Epi/ciliated cells	DNAH5
0	1.36705	0.495	0.023	0	Airway Epi/ciliated cells	CCDC96
0	1.3638	0.502	0.016	0	Airway Epi/ciliated cells	CABCOCO1
0	1.35399	0.477	0.006	0	Airway Epi/ciliated cells	CFAP52
0	1.35066	0.495	0.02	0	Airway Epi/ciliated cells	LKAAEAR1
0	1.35023	0.487	0.006	0	Airway Epi/ciliated cells	C7orf57
0	1.34068	0.441	0.011	0	Airway Epi/ciliated cells	C6orf118
0	1.3317	0.452	0.025	0	Airway Epi/ciliated cells	CDS1
0	1.33132	0.405	0.007	0	Airway Epi/ciliated cells	DTHD1
0	1.32643	0.498	0.022	0	Airway Epi/ciliated cells	IQCD
0	1.31354	0.409	0.011	0	Airway Epi/ciliated cells	RIBC2
0	1.31207	0.534	0.039	0	Airway Epi/ciliated cells	RAB25
0	1.30632	0.455	0.008	0	Airway Epi/ciliated cells	UBXN10
0	1.30612	0.448	0.003	0	Airway Epi/ciliated cells	PIH1D3
0	1.30221	0.462	0.021	0	Airway Epi/ciliated cells	DRC3
0	1.30209	0.409	0.002	0	Airway Epi/ciliated cells	SRGAP3-AS2
0	1.30045	0.423	0.014	0	Airway Epi/ciliated cells	ALG1L
0	1.2834	0.459	0.029	0	Airway Epi/ciliated cells	WDR78
0	1.26753	0.401	0.006	0	Airway Epi/ciliated cells	DNAH11
0	1.25509	0.434	0.002	0	Airway Epi/ciliated cells	CDHR4
0	1.25141	0.452	0.006	0	Airway Epi/ciliated cells	DNAAF3
0	1.2492	0.441	0.018	0	Airway Epi/ciliated cells	WDR66
0	1.24703	0.412	0.001	0	Airway Epi/ciliated cells	ACBD3-AS1
0	1.23898	0.441	0.005	0	Airway Epi/ciliated cells	CFAP77
0	1.22964	0.405	0.001	0	Airway Epi/ciliated cells	AC004832.1
0	1.22016	0.47	0.004	0	Airway Epi/ciliated cells	CFAP299
0	1.21906	0.452	0.02	0	Airway Epi/ciliated cells	ALDH3B1
0	1.21831	0.448	0.012	0	Airway Epi/ciliated cells	SPATA18
0	1.21422	0.434	0.014	0	Airway Epi/ciliated cells	TCTEX1D1
0	1.2132	0.405	0.019	0	Airway Epi/ciliated cells	ST6GALNAC1
0	1.20351	0.423	0.007	0	Airway Epi/ciliated cells	AK7
0	1.201	0.466	0.017	0	Airway Epi/ciliated cells	SPAG8
0	1.1905	0.452	0.01	0	Airway Epi/ciliated cells	CFAP221
0	1.18979	0.409	0.012	0	Airway Epi/ciliated cells	MDH1B
0	1.17693	0.416	0.021	0	Airway Epi/ciliated cells	NEK5
0	1.17058	0.452	0.018	0	Airway Epi/ciliated cells	PIH1D2
0	1.15967	0.441	0.021	0	Airway Epi/ciliated cells	CLIC6
0	1.1548	0.409	0.018	0	Airway Epi/ciliated cells	LRRC10B
0	1.15155	0.412	0.018	0	Airway Epi/ciliated cells	CFAP70
0	1.14595	0.441	0.017	0	Airway Epi/ciliated cells	SPATA17
0	1.13506	0.416	0.008	0	Airway Epi/ciliated cells	PPP1R42
0	1.13457	0.441	0.008	0	Airway Epi/ciliated cells	CASC1
0	1.13109	0.487	0.008	0	Airway Epi/ciliated cells	DAW1
0	1.1046	0.427	0.016	0	Airway Epi/ciliated cells	AL121899.1
0	1.09989	0.416	0.013	0	Airway Epi/ciliated cells	C4orf47
0	1.07724	0.401	0.003	0	Airway Epi/ciliated cells	C1orf158
0	1.06039	0.444	0.01	0	Airway Epi/ciliated cells	CCDC65
0	1.04983	0.409	0.02	0	Airway Epi/ciliated cells	PPP1R14C
0	1.00414	0.423	0.009	0	Airway Epi/ciliated cells	SPEF1
3.12944e-291	1.03273	0.448	0.032	6.95674e-287	Airway Epi/ciliated cells	KRTCAP3
2.20305e-288	2.3618	0.638	0.075	4.89738e-284	Airway Epi/ciliated cells	CCDC146
2.06825e-287	1.46036	0.509	0.045	4.59771e-283	Airway Epi/ciliated cells	OSCP1
4.49773e-287	1.23908	0.477	0.038	9.99846e-283	Airway Epi/ciliated cells	C17orf97
1.04125e-275	1.12809	0.448	0.035	2.3147e-271	Airway Epi/ciliated cells	LRRC6
4.53092e-272	2.4606	0.703	0.101	1.00722e-267	Airway Epi/ciliated cells	DNALI1
5.94996e-270	1.99275	0.638	0.08	1.32268e-265	Airway Epi/ciliated cells	LRRC23
1.70271e-269	1.09412	0.448	0.036	3.78513e-265	Airway Epi/ciliated cells	SPAG1
1.9284e-266	1.08209	0.441	0.035	4.28683e-262	Airway Epi/ciliated cells	TMC4
2.54708e-266	2.53606	0.563	0.06	5.66217e-262	Airway Epi/ciliated cells	CES1
8.58988e-265	2.11142	0.695	0.091	1.90953e-260	Airway Epi/ciliated cells	CLDN4
2.16796e-260	3.05782	0.724	0.105	4.81937e-256	Airway Epi/ciliated cells	SLPI
1.67305e-253	1.99161	0.652	0.088	3.71918e-249	Airway Epi/ciliated cells	DMKN
1.06594e-250	2.36308	0.81	0.139	2.36959e-246	Airway Epi/ciliated cells	KRT19
2.45966e-247	1.4109	0.556	0.059	5.46782e-243	Airway Epi/ciliated cells	CLDN7
9.32268e-246	1.53736	0.513	0.054	2.07243e-241	Airway Epi/ciliated cells	STK33
3.40874e-243	2.56192	0.713	0.111	7.57762e-239	Airway Epi/ciliated cells	PERP
5.16929e-235	1.37251	0.466	0.043	1.14913e-230	Airway Epi/ciliated cells	C19orf33
4.16345e-234	1.63783	0.516	0.053	9.25534e-230	Airway Epi/ciliated cells	TACSTD2
1.06173e-233	2.72804	0.735	0.133	2.36022e-229	Airway Epi/ciliated cells	KIF9
4.55269e-233	1.21568	0.487	0.05	1.01206e-228	Airway Epi/ciliated cells	BBOF1
2.46658e-231	1.91822	0.559	0.069	5.48321e-227	Airway Epi/ciliated cells	DNAAF4
1.22949e-230	1.71924	0.599	0.076	2.73316e-226	Airway Epi/ciliated cells	EPCAM
2.68042e-229	2.60291	0.756	0.145	5.95857e-225	Airway Epi/ciliated cells	TSTD1
1.75061e-221	1.73747	0.556	0.071	3.89161e-217	Airway Epi/ciliated cells	SPACA9
1.83934e-218	2.98107	0.71	0.122	4.08885e-214	Airway Epi/ciliated cells	WFDC2
4.28838e-211	1.92006	0.602	0.09	9.53306e-207	Airway Epi/ciliated cells	IQCG
1.07403e-206	1.21418	0.437	0.045	2.38756e-202	Airway Epi/ciliated cells	TMEM231
3.91073e-197	1.4378	0.534	0.072	8.69354e-193	Airway Epi/ciliated cells	B9D1
5.57277e-191	1.32131	0.491	0.062	1.23883e-186	Airway Epi/ciliated cells	NPHP1
1.33952e-185	1.27371	0.505	0.067	2.97776e-181	Airway Epi/ciliated cells	MYCBP
2.41317e-184	1.90913	0.724	0.145	5.36447e-180	Airway Epi/ciliated cells	KRT8
1.12269e-180	1.0189	0.43	0.049	2.49574e-176	Airway Epi/ciliated cells	TEX9
2.33549e-179	3.2481	0.806	0.24	5.19179e-175	Airway Epi/ciliated cells	MORN2
8.42356e-178	1.00699	0.405	0.044	1.87256e-173	Airway Epi/ciliated cells	TSGA10
2.26426e-177	1.61749	0.573	0.093	5.03345e-173	Airway Epi/ciliated cells	GON7
6.29847e-176	1.6255	0.588	0.093	1.40015e-171	Airway Epi/ciliated cells	TFF3
1.25531e-173	1.03554	0.419	0.048	2.79054e-169	Airway Epi/ciliated cells	IFT172
7.03989e-171	1.39775	0.513	0.075	1.56497e-166	Airway Epi/ciliated cells	UBXN11
4.77573e-169	1.22717	0.444	0.056	1.06165e-164	Airway Epi/ciliated cells	SPEF2
4.46627e-161	3.11813	0.832	0.299	9.92851e-157	Airway Epi/ciliated cells	CETN2
3.68056e-159	1.68024	0.423	0.054	8.18189e-155	Airway Epi/ciliated cells	TNNT3
7.13402e-158	2.58227	0.771	0.229	1.58589e-153	Airway Epi/ciliated cells	TCTEX1D2
6.97443e-156	1.20142	0.473	0.069	1.55042e-151	Airway Epi/ciliated cells	AC244090.1
1.30836e-155	2.01004	0.602	0.122	2.90847e-151	Airway Epi/ciliated cells	MNS1
4.19835e-154	1.06062	0.444	0.061	9.33293e-150	Airway Epi/ciliated cells	FBXW9
2.1268e-152	2.17416	0.681	0.167	4.72788e-148	Airway Epi/ciliated cells	WDR54
9.92514e-152	1.0051	0.416	0.053	2.20636e-147	Airway Epi/ciliated cells	ZNF487
3.95679e-151	1.04161	0.416	0.054	8.79594e-147	Airway Epi/ciliated cells	IRX3
7.18124e-151	1.83333	0.713	0.165	1.59639e-146	Airway Epi/ciliated cells	KRT18
2.26796e-149	1.06383	0.444	0.061	5.04167e-145	Airway Epi/ciliated cells	TNFAIP8L1
8.08928e-149	1.90343	0.634	0.138	1.79825e-144	Airway Epi/ciliated cells	CTXN1
8.82671e-147	1.61727	0.513	0.081	1.96218e-142	Airway Epi/ciliated cells	RRAD
5.12579e-143	2.49684	0.487	0.079	1.13946e-138	Airway Epi/ciliated cells	GDF15
2.10022e-141	1.53537	0.412	0.056	4.66879e-137	Airway Epi/ciliated cells	AC007325.4
5.2304e-131	1.34684	0.534	0.102	1.16272e-126	Airway Epi/ciliated cells	ENDOG
2.15622e-130	2.25352	0.778	0.24	4.79328e-126	Airway Epi/ciliated cells	CD24
1.75321e-129	1.71654	0.695	0.176	3.89738e-125	Airway Epi/ciliated cells	VAMP8
3.05478e-128	1.00647	0.405	0.058	6.79077e-124	Airway Epi/ciliated cells	CENPM
4.15329e-128	1.51496	0.602	0.126	9.23277e-124	Airway Epi/ciliated cells	UCP2
2.58571e-125	1.39965	0.52	0.104	5.74803e-121	Airway Epi/ciliated cells	CC2D2A
6.38996e-124	1.96981	0.638	0.173	1.42049e-119	Airway Epi/ciliated cells	DPCD
2.1616e-120	1.6658	0.616	0.155	4.80524e-116	Airway Epi/ciliated cells	CRNDE
4.62407e-119	1.20629	0.441	0.077	1.02793e-114	Airway Epi/ciliated cells	TRAF3IP1
1.53885e-118	1.09506	0.448	0.078	3.42087e-114	Airway Epi/ciliated cells	EFCAB2
3.44549e-118	2.13212	0.882	0.397	7.65933e-114	Airway Epi/ciliated cells	CKB
5.78056e-114	1.52417	0.577	0.141	1.28502e-109	Airway Epi/ciliated cells	AC084033.3
7.80128e-113	1.92657	0.663	0.185	1.73423e-108	Airway Epi/ciliated cells	CRIP1
8.19644e-113	1.88469	0.606	0.143	1.82207e-108	Airway Epi/ciliated cells	IFI27
1.03094e-112	2.7426	0.753	0.324	2.29179e-108	Airway Epi/ciliated cells	PSENEN
1.1099e-110	1.20933	0.409	0.066	2.46731e-106	Airway Epi/ciliated cells	AQP3
2.46261e-110	1.71656	0.616	0.175	5.47438e-106	Airway Epi/ciliated cells	FAM174A
1.27792e-109	1.77615	0.67	0.217	2.84082e-105	Airway Epi/ciliated cells	RUVBL2
1.13122e-107	1.10166	0.487	0.101	2.51471e-103	Airway Epi/ciliated cells	RABL2B
1.31522e-105	1.02451	0.401	0.07	2.92375e-101	Airway Epi/ciliated cells	ZDHHC1
1.75763e-105	1.61583	0.699	0.206	3.90721e-101	Airway Epi/ciliated cells	PDLIM1
3.15854e-94	2.12332	0.695	0.292	7.02143e-90	Airway Epi/ciliated cells	FAM229B
1.04238e-91	2.44343	0.771	0.419	2.31722e-87	Airway Epi/ciliated cells	CIB1
4.59977e-89	1.97766	0.749	0.376	1.02253e-84	Airway Epi/ciliated cells	DPY30
2.97471e-88	2.32867	0.731	0.358	6.61278e-84	Airway Epi/ciliated cells	IFT57
3.19124e-88	1.25145	0.523	0.126	7.09413e-84	Airway Epi/ciliated cells	MGST1
3.3361e-88	1.38218	0.513	0.13	7.41614e-84	Airway Epi/ciliated cells	RAB11FIP1
4.95891e-87	1.79018	0.667	0.252	1.10237e-82	Airway Epi/ciliated cells	SPINT2
9.33407e-86	1.85097	0.602	0.205	2.07496e-81	Airway Epi/ciliated cells	MRPS31
3.31871e-85	1.50964	0.559	0.162	7.37749e-81	Airway Epi/ciliated cells	ANKRD37
5.48915e-85	1.19016	0.473	0.114	1.22024e-80	Airway Epi/ciliated cells	JPT2
7.84932e-83	1.80115	0.638	0.254	1.7449e-78	Airway Epi/ciliated cells	SPAG16
1.09641e-82	1.12539	0.448	0.106	2.43732e-78	Airway Epi/ciliated cells	METTL7A
1.88689e-82	1.73908	0.563	0.184	4.19455e-78	Airway Epi/ciliated cells	EFHC1
1.0098e-81	1.49932	0.581	0.183	2.24479e-77	Airway Epi/ciliated cells	ARHGAP18
2.54062e-80	1.05329	0.48	0.121	5.6478e-76	Airway Epi/ciliated cells	IQCK
2.91758e-80	1.88181	0.688	0.295	6.48579e-76	Airway Epi/ciliated cells	MLF1
5.8427e-79	1.60459	0.642	0.256	1.29883e-74	Airway Epi/ciliated cells	IFT43
5.45775e-78	1.25992	0.509	0.143	1.21326e-73	Airway Epi/ciliated cells	HSPBP1
7.59573e-78	1.15073	0.477	0.127	1.68853e-73	Airway Epi/ciliated cells	DZIP3
1.17885e-77	1.62539	0.599	0.215	2.62059e-73	Airway Epi/ciliated cells	TCTN1
3.81098e-77	1.14697	0.477	0.128	8.47182e-73	Airway Epi/ciliated cells	MOK
4.15583e-77	1.0699	0.448	0.107	9.23842e-73	Airway Epi/ciliated cells	CARS
1.84809e-75	1.63608	0.577	0.189	4.10831e-71	Airway Epi/ciliated cells	C12orf75
8.87148e-75	1.81222	0.692	0.336	1.97213e-70	Airway Epi/ciliated cells	HSPB11
1.32697e-74	1.35833	0.556	0.185	2.94984e-70	Airway Epi/ciliated cells	CLUAP1
1.87441e-74	1.18001	0.538	0.152	4.1668e-70	Airway Epi/ciliated cells	CTSS
2.75618e-74	1.1443	0.459	0.119	6.12698e-70	Airway Epi/ciliated cells	RFX3
3.41588e-74	1.79612	0.638	0.278	7.59349e-70	Airway Epi/ciliated cells	CFAP298
1.22513e-73	1.76561	0.638	0.277	2.72346e-69	Airway Epi/ciliated cells	IFT22
1.48765e-73	1.07425	0.477	0.13	3.30705e-69	Airway Epi/ciliated cells	LZTFL1
2.78886e-73	1.11947	0.527	0.161	6.19963e-69	Airway Epi/ciliated cells	WDR34
3.12241e-72	1.01028	0.495	0.14	6.94111e-68	Airway Epi/ciliated cells	SPATA33
3.62707e-69	1.62441	0.72	0.343	8.06298e-65	Airway Epi/ciliated cells	EZR
6.76443e-68	1.15386	0.52	0.167	1.50373e-63	Airway Epi/ciliated cells	TMEM107
5.69702e-66	1.37834	0.459	0.137	1.26645e-61	Airway Epi/ciliated cells	CEP126
5.96766e-65	1.59411	0.577	0.23	1.32661e-60	Airway Epi/ciliated cells	P4HTM
5.51522e-63	1.15302	0.473	0.137	1.22603e-58	Airway Epi/ciliated cells	KIF21A
1.1655e-62	1.35656	0.552	0.211	2.5909e-58	Airway Epi/ciliated cells	RUVBL1
1.51245e-60	1.11579	0.484	0.155	3.36218e-56	Airway Epi/ciliated cells	DYNC2LI1
1.05377e-59	1.29207	0.559	0.215	2.34253e-55	Airway Epi/ciliated cells	IFT27
1.4521e-59	1.01354	0.444	0.127	3.22801e-55	Airway Epi/ciliated cells	NEDD4L
3.75676e-59	1.48629	0.487	0.163	8.35128e-55	Airway Epi/ciliated cells	ALCAM
1.26549e-58	1.04558	0.491	0.159	2.81319e-54	Airway Epi/ciliated cells	FAM104B
1.8788e-54	1.19671	0.588	0.25	4.17658e-50	Airway Epi/ciliated cells	COQ4
3.97531e-53	1.3002	0.459	0.148	8.83712e-49	Airway Epi/ciliated cells	ALDH1A1
5.74274e-52	1.01477	0.48	0.158	1.27661e-47	Airway Epi/ciliated cells	STARD10
2.22048e-51	1.03485	0.502	0.19	4.93613e-47	Airway Epi/ciliated cells	UBAC1
3.40752e-50	1.20317	0.588	0.27	7.57492e-46	Airway Epi/ciliated cells	RPA3
5.69601e-47	1.37342	0.599	0.282	1.26622e-42	Airway Epi/ciliated cells	ANXA4
1.19768e-45	1.16298	0.538	0.233	2.66244e-41	Airway Epi/ciliated cells	C11orf74
7.04671e-45	1.20555	0.738	0.422	1.56648e-40	Airway Epi/ciliated cells	IGFBP2
7.30875e-45	1.30619	0.659	0.34	1.62473e-40	Airway Epi/ciliated cells	CD9
0	3.35906	0.788	0.029	0	Retinal Epi/ciliated cells	PCP4
0	3.09518	0.843	0.04	0	Retinal Epi/ciliated cells	C9orf24
0	3.02665	0.571	0.023	0	Retinal Epi/ciliated cells	CP
0	2.99584	0.691	0.027	0	Retinal Epi/ciliated cells	FOLR1
0	2.82311	0.783	0.03	0	Retinal Epi/ciliated cells	C1orf194
0	2.59918	0.751	0.038	0	Retinal Epi/ciliated cells	PIFO
0	2.50293	0.521	0.01	0	Retinal Epi/ciliated cells	WFIKKN2
0	2.43533	0.71	0.046	0	Retinal Epi/ciliated cells	CA2
0	2.42525	0.682	0.037	0	Retinal Epi/ciliated cells	RSPH1
0	2.27834	0.677	0.022	0	Retinal Epi/ciliated cells	CFAP126
0	2.07677	0.608	0.019	0	Retinal Epi/ciliated cells	C11orf88
0	1.88902	0.502	0.03	0	Retinal Epi/ciliated cells	TRPM3
0	1.88339	0.53	0.005	0	Retinal Epi/ciliated cells	SLC13A4
0	1.7744	0.553	0.027	0	Retinal Epi/ciliated cells	ZMYND10
0	1.68599	0.502	0.024	0	Retinal Epi/ciliated cells	FAM183A
0	1.68117	0.553	0.013	0	Retinal Epi/ciliated cells	FAM81B
0	1.51175	0.498	0.017	0	Retinal Epi/ciliated cells	CAPSL
0	1.42972	0.479	0.025	0	Retinal Epi/ciliated cells	EFCAB1
0	1.3957	0.452	0.018	0	Retinal Epi/ciliated cells	MORN5
0	1.39242	0.447	0.023	0	Retinal Epi/ciliated cells	DYNLRB2
0	1.36912	0.415	0.002	0	Retinal Epi/ciliated cells	HTR2C
0	1.23284	0.419	0.01	0	Retinal Epi/ciliated cells	DAW1
0	1.18995	0.442	0.021	0	Retinal Epi/ciliated cells	FOXJ1
0	1.12495	0.415	0.012	0	Retinal Epi/ciliated cells	SPAG6
0	1.08329	0.41	0.002	0	Retinal Epi/ciliated cells	SLC39A12
0	1.05251	0.41	0.013	0	Retinal Epi/ciliated cells	ARMC3
0	1.0417	0.447	0.023	0	Retinal Epi/ciliated cells	PIP5K1B
4.65454e-306	1.86757	0.599	0.046	1.0347e-301	Retinal Epi/ciliated cells	C5orf49
5.83581e-276	1.75929	0.594	0.05	1.2973e-271	Retinal Epi/ciliated cells	C9orf116
9.09441e-275	2.61061	0.714	0.076	2.02169e-270	Retinal Epi/ciliated cells	CAPS
4.46037e-273	1.32012	0.415	0.023	9.9154e-269	Retinal Epi/ciliated cells	AC007906.2
8.24871e-190	1.51093	0.544	0.062	1.83369e-185	Retinal Epi/ciliated cells	TPD52L1
1.33436e-188	2.1195	0.765	0.135	2.96628e-184	Retinal Epi/ciliated cells	KIF9
4.09827e-176	1.24586	0.664	0.091	9.11045e-172	Retinal Epi/ciliated cells	CLDN5
3.04178e-171	1.80693	0.747	0.13	6.76188e-167	Retinal Epi/ciliated cells	PCSK1N
1.63085e-170	1.52758	0.502	0.057	3.62537e-166	Retinal Epi/ciliated cells	SPA17
4.26278e-169	1.45069	0.641	0.089	9.47617e-165	Retinal Epi/ciliated cells	S100B
1.80543e-150	1.55224	0.521	0.069	4.01347e-146	Retinal Epi/ciliated cells	ODF3B
9.41468e-140	1.55711	0.544	0.084	2.09288e-135	Retinal Epi/ciliated cells	GRAMD2B
1.34724e-139	2.78832	0.853	0.248	2.99492e-135	Retinal Epi/ciliated cells	C2orf40
5.47737e-133	1.23335	0.424	0.051	1.21762e-128	Retinal Epi/ciliated cells	NME5
2.03147e-130	8.99125	0.899	0.358	4.51595e-126	Retinal Epi/ciliated cells	TTR
4.63134e-117	1.91997	0.696	0.174	1.02955e-112	Retinal Epi/ciliated cells	CDO1
2.68319e-116	1.25507	0.535	0.091	5.96473e-112	Retinal Epi/ciliated cells	DMKN
8.22585e-107	1.45533	0.544	0.104	1.82861e-102	Retinal Epi/ciliated cells	DNALI1
4.49932e-100	1.4455	0.475	0.083	1.0002e-95	Retinal Epi/ciliated cells	PPP1R1B
4.42383e-98	1.27638	0.613	0.142	9.83418e-94	Retinal Epi/ciliated cells	LYPLA2
4.84354e-92	2.38762	0.839	0.344	1.07672e-87	Retinal Epi/ciliated cells	CLU
1.11796e-89	2.57022	0.857	0.394	2.48524e-85	Retinal Epi/ciliated cells	RBP1
2.99043e-84	1.2739	0.433	0.079	6.64773e-80	Retinal Epi/ciliated cells	CCDC146
3.85878e-84	1.86644	0.714	0.243	8.57807e-80	Retinal Epi/ciliated cells	MORN2
8.49875e-83	1.75147	0.622	0.174	1.88927e-78	Retinal Epi/ciliated cells	AK1
1.85166e-80	1.48813	0.567	0.14	4.11623e-76	Retinal Epi/ciliated cells	CTXN1
3.421e-79	2.04409	0.742	0.301	7.60488e-75	Retinal Epi/ciliated cells	CETN2
5.21028e-72	1.11859	0.447	0.096	1.15824e-67	Retinal Epi/ciliated cells	GON7
9.50642e-70	1.02482	0.406	0.079	2.11328e-65	Retinal Epi/ciliated cells	RAMP1
9.51878e-68	1.64467	0.728	0.296	2.11602e-63	Retinal Epi/ciliated cells	MLF1
5.03172e-63	1.89646	0.825	0.473	1.11855e-58	Retinal Epi/ciliated cells	RARRES2
1.1572e-59	1.12046	0.512	0.143	2.57246e-55	Retinal Epi/ciliated cells	AC084033.3
1.71446e-57	1.08472	0.475	0.129	3.81125e-53	Retinal Epi/ciliated cells	MLLT1
2.01146e-55	1.58499	0.825	0.486	4.47147e-51	Retinal Epi/ciliated cells	MRPS6
3.7188e-55	1.29793	0.585	0.216	8.26689e-51	Retinal Epi/ciliated cells	TCTN1
1.46773e-50	1.02831	0.507	0.152	3.26276e-46	Retinal Epi/ciliated cells	PLA2G16
6.05587e-50	1.35346	0.419	0.108	1.34622e-45	Retinal Epi/ciliated cells	TPPP3
1.66677e-48	1.29899	0.76	0.411	3.70522e-44	Retinal Epi/ciliated cells	CYSTM1
3.96608e-48	1.6699	0.705	0.374	8.81659e-44	Retinal Epi/ciliated cells	PLTP
2.52107e-47	1.26221	0.94	0.604	5.60433e-43	Retinal Epi/ciliated cells	IGFBP7
4.09513e-43	1.02672	0.507	0.186	9.10347e-39	Retinal Epi/ciliated cells	SLC22A17
1.73759e-42	1.41249	0.793	0.399	3.86266e-38	Retinal Epi/ciliated cells	CKB
3.03819e-42	1.06329	0.456	0.144	6.7539e-38	Retinal Epi/ciliated cells	ENPP2
8.88892e-41	1.41853	0.691	0.379	1.97601e-36	Retinal Epi/ciliated cells	DNPH1
1.14322e-40	1.07905	0.438	0.131	2.54138e-36	Retinal Epi/ciliated cells	LY6H
3.13638e-39	1.22423	0.608	0.278	6.97218e-35	Retinal Epi/ciliated cells	IFT22
2.15044e-38	1.82016	0.747	0.423	4.78042e-34	Retinal Epi/ciliated cells	IGFBP2
1.81971e-37	1.17928	0.539	0.206	4.04521e-33	Retinal Epi/ciliated cells	MSX1
1.17795e-36	1.15007	0.553	0.233	2.61859e-32	Retinal Epi/ciliated cells	TCTEX1D2
2.00782e-34	1.46392	0.636	0.315	4.46338e-30	Retinal Epi/ciliated cells	METRN
5.50473e-34	1.37192	0.677	0.374	1.2237e-29	Retinal Epi/ciliated cells	CHCHD10
0	4.90704	0.754	0.03	0	Mid/Hindgut Epi	FABP1
0	4.87508	0.837	0.027	0	Mid/Hindgut Epi	PHGR1
0	4.65118	0.804	0.028	0	Mid/Hindgut Epi	LGALS4
0	4.28299	0.794	0.09	0	Mid/Hindgut Epi	TFF3
0	3.89629	0.91	0.087	0	Mid/Hindgut Epi	CLDN4
0	3.80808	0.92	0.141	0	Mid/Hindgut Epi	KRT8
0	3.58077	0.834	0.072	0	Mid/Hindgut Epi	EPCAM
0	3.4989	0.884	0.162	0	Mid/Hindgut Epi	KRT18
0	3.37572	0.794	0.049	0	Mid/Hindgut Epi	CLDN3
0	3.21798	0.857	0.06	0	Mid/Hindgut Epi	ELF3
0	3.16757	0.724	0.093	0	Mid/Hindgut Epi	TSPAN8
0	3.07477	0.701	0.068	0	Mid/Hindgut Epi	AGR2
0	3.0472	0.588	0.028	0	Mid/Hindgut Epi	GSTA1
0	3.04004	0.585	0.005	0	Mid/Hindgut Epi	FABP2
0	2.53149	0.734	0.056	0	Mid/Hindgut Epi	CLDN7
0	2.4682	0.674	0.028	0	Mid/Hindgut Epi	LGALS2
0	2.36275	0.618	0.015	0	Mid/Hindgut Epi	AMN
0	2.23382	0.449	0.007	0	Mid/Hindgut Epi	FGB
0	2.11302	0.415	0.008	0	Mid/Hindgut Epi	CEL
0	2.01974	0.492	0.004	0	Mid/Hindgut Epi	MUC13
0	2.01085	0.518	0.004	0	Mid/Hindgut Epi	CDHR5
0	1.86594	0.618	0.041	0	Mid/Hindgut Epi	C19orf33
0	1.81701	0.658	0.06	0	Mid/Hindgut Epi	FXYD3
0	1.76194	0.425	0.004	0	Mid/Hindgut Epi	ARL14
0	1.64776	0.565	0.039	0	Mid/Hindgut Epi	SPINK1
0	1.64569	0.532	0.006	0	Mid/Hindgut Epi	SMIM24
0	1.61423	0.618	0.031	0	Mid/Hindgut Epi	AGR3
0	1.55875	0.581	0.034	0	Mid/Hindgut Epi	SMIM22
0	1.51393	0.561	0.004	0	Mid/Hindgut Epi	CDX1
0	1.50262	0.535	0.008	0	Mid/Hindgut Epi	PRSS3
0	1.47169	0.578	0.033	0	Mid/Hindgut Epi	S100A14
0	1.40345	0.578	0.03	0	Mid/Hindgut Epi	GPR160
0	1.3123	0.525	0.013	0	Mid/Hindgut Epi	MISP
0	1.30628	0.458	0.018	0	Mid/Hindgut Epi	CYP3A5
0	1.30383	0.518	0.003	0	Mid/Hindgut Epi	SLC39A5
0	1.30218	0.465	0.031	0	Mid/Hindgut Epi	TSPAN1
0	1.26085	0.468	0.001	0	Mid/Hindgut Epi	MEP1A
0	1.14847	0.475	0.003	0	Mid/Hindgut Epi	CDH17
0	1.11494	0.458	0.021	0	Mid/Hindgut Epi	PRSS8
0	1.11259	0.472	0.028	0	Mid/Hindgut Epi	CYP2W1
0	1.09058	0.432	0.004	0	Mid/Hindgut Epi	HMGCS2
0	1.03945	0.548	0.038	0	Mid/Hindgut Epi	RAB25
0	1.02359	0.508	0.007	0	Mid/Hindgut Epi	USH1C
0	1.01759	0.505	0.033	0	Mid/Hindgut Epi	ST14
0	1.01577	0.425	0.022	0	Mid/Hindgut Epi	LAMB3
0	1.00446	0.425	0.012	0	Mid/Hindgut Epi	TMEM45B
1.48087e-290	1.15583	0.558	0.055	3.29198e-286	Mid/Hindgut Epi	SPINT1
4.8817e-286	3.52835	0.595	0.066	1.0852e-281	Mid/Hindgut Epi	SERPINA1
1.96918e-280	1.32776	0.435	0.034	4.3775e-276	Mid/Hindgut Epi	DPEP1
2.9764e-273	1.51955	0.641	0.078	6.61653e-269	Mid/Hindgut Epi	DSP
7.97591e-263	1.83043	0.585	0.065	1.77304e-258	Mid/Hindgut Epi	C15orf48
1.69974e-259	1.25231	0.492	0.049	3.77851e-255	Mid/Hindgut Epi	DHRS11
4.59851e-247	1.77061	0.442	0.04	1.02225e-242	Mid/Hindgut Epi	EDN1
2.4849e-232	2.25276	0.767	0.139	5.52394e-228	Mid/Hindgut Epi	KRT19
1.56337e-230	1.07971	0.405	0.036	3.47537e-226	Mid/Hindgut Epi	SDCBP2
2.47711e-230	1.13357	0.558	0.07	5.50661e-226	Mid/Hindgut Epi	LSR
9.81033e-212	1.48436	0.542	0.073	2.18084e-207	Mid/Hindgut Epi	TMEM238
4.04244e-198	1.84239	0.551	0.077	8.98635e-194	Mid/Hindgut Epi	GDF15
6.12906e-191	2.081	0.664	0.127	1.36249e-186	Mid/Hindgut Epi	RAB11FIP1
1.88497e-189	1.98557	0.711	0.154	4.1903e-185	Mid/Hindgut Epi	STARD10
3.77643e-182	6.02782	0.478	0.066	8.39501e-178	Mid/Hindgut Epi	APOA1
3.44908e-172	1.24691	0.621	0.111	7.6673e-168	Mid/Hindgut Epi	PERP
3.18206e-171	1.60019	0.472	0.067	7.07371e-167	Mid/Hindgut Epi	DNASE1
3.32475e-166	1.19519	0.551	0.095	7.39092e-162	Mid/Hindgut Epi	ARID3A
1.71994e-158	1.33592	0.571	0.104	3.82343e-154	Mid/Hindgut Epi	KLF5
1.19892e-145	1.98581	0.495	0.084	2.66519e-141	Mid/Hindgut Epi	RARRES1
1.22449e-133	1.01325	0.502	0.093	2.72204e-129	Mid/Hindgut Epi	TST
7.93533e-133	1.64448	0.472	0.084	1.76402e-128	Mid/Hindgut Epi	ANPEP
6.24876e-127	1.46809	0.591	0.133	1.3891e-122	Mid/Hindgut Epi	GCHFR
2.68114e-116	1.93287	0.605	0.154	5.96017e-112	Mid/Hindgut Epi	PHLDA2
4.84917e-110	1.37651	0.515	0.114	1.07797e-105	Mid/Hindgut Epi	GPRC5A
4.42746e-109	1.60392	0.728	0.251	9.84225e-105	Mid/Hindgut Epi	SPINT2
3.75973e-105	1.66603	0.728	0.282	8.35788e-101	Mid/Hindgut Epi	TMEM141
1.2509e-99	1.4087	0.498	0.117	2.78074e-95	Mid/Hindgut Epi	DGAT1
4.93651e-97	1.01227	0.538	0.129	1.09739e-92	Mid/Hindgut Epi	JUP
5.71281e-96	1.31129	0.668	0.206	1.26996e-91	Mid/Hindgut Epi	PDLIM1
4.13864e-82	1.30576	0.621	0.2	9.20019e-78	Mid/Hindgut Epi	TMEM176A
1.81207e-81	1.53059	0.688	0.285	4.02823e-77	Mid/Hindgut Epi	CAMK2N1
5.13048e-63	1.51081	0.648	0.281	1.14051e-58	Mid/Hindgut Epi	ANXA4
3.93945e-60	1.13322	0.508	0.177	8.75739e-56	Mid/Hindgut Epi	TRIB1
2.92838e-59	1.34662	0.585	0.233	6.5098e-55	Mid/Hindgut Epi	AGPAT2
5.52461e-57	1.07076	0.598	0.224	1.22812e-52	Mid/Hindgut Epi	TMEM176B
1.94724e-56	1.37166	0.684	0.343	4.32871e-52	Mid/Hindgut Epi	EZR
9.07112e-48	1.31067	0.528	0.214	2.01651e-43	Mid/Hindgut Epi	NCOA7
9.11557e-45	1.18488	0.581	0.268	2.02639e-40	Mid/Hindgut Epi	TENT5A
0	7.05178	0.64	0.023	0	Foregut Epi	SPRR3
0	5.97173	0.928	0.048	0	Foregut Epi	KRT13
0	5.68319	0.766	0.004	0	Foregut Epi	TMPRSS11B
0	5.61211	0.892	0.034	0	Foregut Epi	LCN2
0	5.38725	0.766	0.017	0	Foregut Epi	SPINK5
0	5.25351	0.748	0.018	0	Foregut Epi	LYPD2
0	4.92218	0.793	0.026	0	Foregut Epi	MAL
0	4.42582	0.477	0.005	0	Foregut Epi	SPRR1B
0	4.14609	0.766	0.003	0	Foregut Epi	KRT78
0	3.9135	0.64	0.006	0	Foregut Epi	RHCG
0	3.66582	0.757	0.012	0	Foregut Epi	SERPINB2
0	3.58244	0.423	0.001	0	Foregut Epi	CRNN
0	3.54023	0.694	0.002	0	Foregut Epi	MUC21
0	3.21045	0.757	0.013	0	Foregut Epi	PRSS27
0	3.20549	0.694	0.029	0	Foregut Epi	CXCL17
0	3.06246	0.766	0.004	0	Foregut Epi	SCEL
0	2.93145	0.703	0.001	0	Foregut Epi	TMPRSS11E
0	2.81325	0.739	0.03	0	Foregut Epi	FAM3D
0	2.69497	0.577	0.018	0	Foregut Epi	MUC4
0	2.63786	0.55	0.012	0	Foregut Epi	CEACAM6
0	2.61085	0.739	0.023	0	Foregut Epi	PPL
0	2.42301	0.658	0.002	0	Foregut Epi	A2ML1
0	2.27968	0.631	0.01	0	Foregut Epi	PSCA
0	2.25354	0.766	0.024	0	Foregut Epi	PRSS8
0	2.17363	0.703	0.027	0	Foregut Epi	SPNS2
0	2.15606	0.757	0.016	0	Foregut Epi	PRSS22
0	2.09573	0.685	0.026	0	Foregut Epi	TTC9
0	2.0383	0.649	0.003	0	Foregut Epi	NCCRP1
0	1.96704	0.559	0.011	0	Foregut Epi	CST6
0	1.96152	0.649	0.024	0	Foregut Epi	C6orf132
0	1.89745	0.721	0.012	0	Foregut Epi	NECTIN4
0	1.86864	0.658	0.02	0	Foregut Epi	SMIM5
0	1.83369	0.649	0.006	0	Foregut Epi	FUT3
0	1.83187	0.667	0.008	0	Foregut Epi	ADGRF1
0	1.8298	0.586	0.005	0	Foregut Epi	AC092490.1
0	1.82831	0.595	0.005	0	Foregut Epi	C2orf54
0	1.79594	0.784	0.037	0	Foregut Epi	SPINT1-AS1
0	1.77953	0.703	0.019	0	Foregut Epi	VSIG2
0	1.76389	0.613	0.004	0	Foregut Epi	KRT80
0	1.76221	0.703	0.009	0	Foregut Epi	TMEM40
0	1.75383	0.432	0.007	0	Foregut Epi	CEACAM5
0	1.66575	0.694	0.025	0	Foregut Epi	EHF
0	1.65337	0.577	0.003	0	Foregut Epi	CYSRT1
0	1.65108	0.658	0.029	0	Foregut Epi	GRHL1
0	1.59134	0.568	0.001	0	Foregut Epi	TMPRSS11D
0	1.58656	0.595	0.015	0	Foregut Epi	GDPD3
0	1.57317	0.667	0.011	0	Foregut Epi	C1orf116
0	1.53289	0.631	0.024	0	Foregut Epi	DAPP1
0	1.3674	0.468	0.001	0	Foregut Epi	PADI1
0	1.31132	0.523	0.005	0	Foregut Epi	RNF39
0	1.30874	0.631	0.018	0	Foregut Epi	BICDL2
0	1.2599	0.55	0.018	0	Foregut Epi	CDKN2B
0	1.24685	0.559	0.014	0	Foregut Epi	MUC20
0	1.2185	0.514	0.015	0	Foregut Epi	CEACAM1
0	1.21729	0.477	0.004	0	Foregut Epi	SLC6A14
0	1.21552	0.486	0.007	0	Foregut Epi	EVPL
0	1.19788	0.514	0.01	0	Foregut Epi	MUC15
0	1.17323	0.414	0.007	0	Foregut Epi	GCNT3
0	1.17228	0.604	0.017	0	Foregut Epi	CRB3
0	1.13834	0.486	0.009	0	Foregut Epi	TINCR
0	1.0949	0.495	0.009	0	Foregut Epi	SCNN1A
0	1.06887	0.595	0.004	0	Foregut Epi	PTK6
0	1.04956	0.577	0.002	0	Foregut Epi	FUT6
2.14662e-294	3.97308	0.847	0.055	4.77194e-290	Foregut Epi	TACSTD2
1.30151e-293	1.92348	0.712	0.038	2.89325e-289	Foregut Epi	SDCBP2
1.38562e-293	2.78016	0.793	0.048	3.08024e-289	Foregut Epi	EPS8L1
2.32597e-292	1.21604	0.541	0.02	5.17064e-288	Foregut Epi	BCAS1
9.71988e-286	1.29676	0.613	0.028	2.16073e-281	Foregut Epi	PRRG4
2.45286e-285	2.11486	0.739	0.042	5.45272e-281	Foregut Epi	RAB25
6.36201e-280	1.33266	0.459	0.015	1.41428e-275	Foregut Epi	LIPH
1.07177e-277	2.39769	0.766	0.047	2.38254e-273	Foregut Epi	MAL2
2.13109e-268	1.99606	0.685	0.038	4.73742e-264	Foregut Epi	MALL
3.35464e-266	2.71066	0.748	0.045	7.45736e-262	Foregut Epi	IL1RN
1.13617e-262	2.62243	0.811	0.058	2.52571e-258	Foregut Epi	SPINT1
3.06824e-257	1.5775	0.649	0.035	6.8207e-253	Foregut Epi	HSPB8
1.95204e-253	1.03243	0.459	0.017	4.33938e-249	Foregut Epi	FAM3B
2.51966e-250	2.91131	0.82	0.062	5.6012e-246	Foregut Epi	CLDN7
2.77377e-250	3.7215	0.667	0.038	6.1661e-246	Foregut Epi	S100P
4.26047e-250	1.83498	0.712	0.044	9.47102e-246	Foregut Epi	EPS8L2
5.67309e-247	2.59448	0.622	0.033	1.26113e-242	Foregut Epi	KRT7
5.84961e-246	1.054	0.613	0.032	1.30037e-241	Foregut Epi	GNA15
1.67704e-244	3.48338	0.847	0.067	3.72805e-240	Foregut Epi	ELF3
7.46048e-240	2.92177	0.649	0.037	1.65846e-235	Foregut Epi	S100A14
1.27741e-232	1.46685	0.495	0.022	2.83968e-228	Foregut Epi	CTSV
2.13163e-230	1.73686	0.613	0.034	4.7386e-226	Foregut Epi	GPR160
2.63992e-222	6.96145	0.928	0.096	5.86855e-218	Foregut Epi	S100A9
1.53801e-213	1.09558	0.423	0.017	3.41899e-209	Foregut Epi	RHOV
6.23288e-211	4.01499	0.775	0.066	1.38557e-206	Foregut Epi	CLIC3
7.5737e-201	1.12264	0.495	0.025	1.68363e-196	Foregut Epi	LNX1
3.83427e-195	1.0995	0.477	0.024	8.52358e-191	Foregut Epi	ZNF185
1.7829e-190	2.01911	0.64	0.045	3.96339e-186	Foregut Epi	C19orf33
2.11898e-180	1.22078	0.586	0.039	4.7105e-176	Foregut Epi	SMIM22
4.11497e-180	2.21821	0.495	0.028	9.14758e-176	Foregut Epi	KRT15
9.25148e-176	1.11947	0.568	0.039	2.0566e-171	Foregut Epi	DENND2C
2.45569e-174	3.16063	0.694	0.061	5.45899e-170	Foregut Epi	CSTA
1.05093e-169	1.24833	0.55	0.038	2.33621e-165	Foregut Epi	PARD6B
6.44873e-166	3.78908	0.721	0.069	1.43355e-161	Foregut Epi	C15orf48
4.39942e-164	1.51221	0.523	0.035	9.77991e-160	Foregut Epi	LYPD3
3.57665e-161	1.23279	0.523	0.035	7.9509e-157	Foregut Epi	ARHGAP27
1.04239e-160	1.79838	0.667	0.061	2.31724e-156	Foregut Epi	SH3BGRL2
2.28135e-158	2.41143	0.514	0.035	5.07144e-154	Foregut Epi	CNFN
5.63587e-158	1.29281	0.595	0.046	1.25285e-153	Foregut Epi	ERBB3
2.78017e-149	1.34615	0.622	0.054	6.18032e-145	Foregut Epi	F11R
6.217e-147	1.75265	0.694	0.073	1.38204e-142	Foregut Epi	HSBP1L1
2.17409e-146	3.40697	0.829	0.115	4.83301e-142	Foregut Epi	PERP
9.86433e-146	5.39812	0.901	0.144	2.19284e-141	Foregut Epi	HOPX
2.16711e-144	1.80822	0.649	0.059	4.81749e-140	Foregut Epi	STEAP4
4.30283e-144	3.99604	0.91	0.144	9.5652e-140	Foregut Epi	KRT19
1.88362e-143	2.68997	0.793	0.095	4.18729e-139	Foregut Epi	CLDN4
2.96111e-139	1.1894	0.405	0.024	6.58255e-135	Foregut Epi	SFN
2.48852e-138	2.13129	0.721	0.082	5.53198e-134	Foregut Epi	DSP
1.90608e-129	2.37454	0.703	0.082	4.23721e-125	Foregut Epi	PITX1
3.17398e-129	5.99445	0.577	0.056	7.05576e-125	Foregut Epi	S100A8
5.03397e-128	3.15657	0.766	0.111	1.11905e-123	Foregut Epi	LMO7
1.2845e-124	3.04848	0.784	0.119	2.85544e-120	Foregut Epi	FAM129B
1.37333e-124	3.15805	0.82	0.131	3.05291e-120	Foregut Epi	RAB11FIP1
9.14366e-121	2.31161	0.775	0.112	2.03263e-116	Foregut Epi	SERINC2
1.27661e-118	1.39206	0.604	0.063	2.83791e-114	Foregut Epi	PIK3IP1
9.55191e-118	1.54602	0.658	0.08	2.12339e-113	Foregut Epi	STN1
1.63859e-117	1.91904	0.468	0.039	3.64258e-113	Foregut Epi	MUC1
1.13557e-115	1.10924	0.477	0.041	2.52436e-111	Foregut Epi	FAM84A
4.7897e-112	2.74272	0.757	0.116	1.06475e-107	Foregut Epi	GPRC5A
4.37774e-111	1.36595	0.595	0.065	9.73171e-107	Foregut Epi	EPHA2
1.93988e-108	4.7151	0.757	0.128	4.31235e-104	Foregut Epi	ECM1
1.04429e-106	1.21706	0.649	0.082	2.32146e-102	Foregut Epi	USP6NL
1.81725e-104	1.2391	0.495	0.049	4.03976e-100	Foregut Epi	SH2D4A
2.62951e-104	1.85753	0.721	0.107	5.8454e-100	Foregut Epi	KLF5
2.98817e-100	1.29217	0.495	0.051	6.6427e-96	Foregut Epi	AC004130.1
2.49764e-89	1.33988	0.658	0.1	5.55226e-85	Foregut Epi	SMAGP
3.07211e-88	2.5452	0.676	0.11	6.82931e-84	Foregut Epi	SLPI
7.1769e-85	1.57116	0.523	0.066	1.59543e-80	Foregut Epi	HPGD
3.49561e-83	1.41474	0.64	0.105	7.77073e-79	Foregut Epi	NAPRT
3.72064e-83	1.72243	0.441	0.048	8.27099e-79	Foregut Epi	PLAC8
1.762e-79	1.86395	0.658	0.116	3.91692e-75	Foregut Epi	ITGB8
1.30315e-77	1.54296	0.586	0.09	2.89691e-73	Foregut Epi	FBXO32
4.34793e-77	1.30856	0.505	0.067	9.66544e-73	Foregut Epi	AIF1L
6.87089e-77	2.49982	0.73	0.151	1.5274e-72	Foregut Epi	MXD1
3.57861e-76	3.23425	0.468	0.059	7.95526e-72	Foregut Epi	KRT17
4.32123e-76	2.20976	0.631	0.111	9.60609e-72	Foregut Epi	F3
6.14771e-76	1.48858	0.694	0.132	1.36664e-71	Foregut Epi	JUP
4.6765e-75	1.70914	0.73	0.152	1.03958e-70	Foregut Epi	TMBIM1
6.59734e-74	1.40142	0.703	0.143	1.46659e-69	Foregut Epi	TRIP10
1.44151e-72	1.47494	0.676	0.131	3.20448e-68	Foregut Epi	RHOD
1.00003e-70	2.0635	0.766	0.18	2.22308e-66	Foregut Epi	VAMP8
1.17502e-70	1.40137	0.739	0.149	2.61206e-66	Foregut Epi	KRT8
5.59706e-67	1.24559	0.486	0.069	1.24423e-62	Foregut Epi	AQP3
9.52119e-63	3.73342	0.955	0.612	2.11656e-58	Foregut Epi	LGALS3
2.92028e-61	3.34166	0.793	0.252	6.49179e-57	Foregut Epi	NDRG2
2.30243e-60	1.29936	0.613	0.119	5.1183e-56	Foregut Epi	TMEM54
3.2366e-60	2.17347	0.766	0.233	7.19497e-56	Foregut Epi	RIOK3
9.79629e-59	1.6926	0.622	0.132	2.17772e-54	Foregut Epi	FAM214A
9.89264e-59	2.74628	0.658	0.161	2.19913e-54	Foregut Epi	ERO1A
1.15e-58	1.66968	0.721	0.169	2.55645e-54	Foregut Epi	KRT18
3.00639e-58	1.32104	0.658	0.147	6.68321e-54	Foregut Epi	RNF141
9.84403e-58	1.31531	0.613	0.129	2.18833e-53	Foregut Epi	NT5C2
1.03181e-56	1.59847	0.712	0.192	2.29371e-52	Foregut Epi	AFDN
2.4631e-56	1.08074	0.45	0.066	5.47547e-52	Foregut Epi	FXYD3
2.5645e-53	1.23225	0.486	0.086	5.70088e-49	Foregut Epi	ZNF117
1.17063e-52	1.47188	0.667	0.169	2.60232e-48	Foregut Epi	HIST1H2AC
3.60847e-51	1.31807	0.721	0.198	8.02162e-47	Foregut Epi	PDLIM5
1.43236e-49	2.72899	0.712	0.215	3.18415e-45	Foregut Epi	HIST1H1C
1.50663e-49	2.81993	0.802	0.374	3.34923e-45	Foregut Epi	HEBP2
8.4067e-48	1.79407	0.73	0.25	1.86881e-43	Foregut Epi	SLK
1.6583e-47	1.08663	0.595	0.138	3.68639e-43	Foregut Epi	SLC25A23
2.72469e-47	1.37891	0.694	0.209	6.05698e-43	Foregut Epi	GIPC1
3.7955e-47	1.77236	0.748	0.259	8.43739e-43	Foregut Epi	OPTN
2.44959e-45	1.33119	0.541	0.12	5.44545e-41	Foregut Epi	SAMD9
1.46672e-44	1.10504	0.514	0.108	3.26053e-40	Foregut Epi	RMND5A
1.6868e-44	1.50705	0.721	0.255	3.74975e-40	Foregut Epi	VPS4B
1.22756e-43	1.23698	0.721	0.238	2.72887e-39	Foregut Epi	ADIPOR1
1.46923e-43	1.22906	0.631	0.163	3.2661e-39	Foregut Epi	MYO6
1.81876e-43	1.42174	0.766	0.255	4.0431e-39	Foregut Epi	SPINT2
2.31666e-43	1.88236	0.793	0.37	5.14994e-39	Foregut Epi	CARHSP1
1.42951e-42	1.0239	0.622	0.159	3.1778e-38	Foregut Epi	CPEB4
2.1457e-42	1.01038	0.577	0.148	4.76988e-38	Foregut Epi	NDFIP2
2.60787e-42	1.77993	0.82	0.426	5.7973e-38	Foregut Epi	YPEL3
8.59007e-42	1.6155	0.73	0.246	1.90957e-37	Foregut Epi	RAB9A
2.15982e-41	1.8983	0.865	0.474	4.80128e-37	Foregut Epi	MAP1LC3A
1.68354e-40	1.32576	0.568	0.149	3.74252e-36	Foregut Epi	SASH1
1.84829e-40	1.08961	0.468	0.1	4.10875e-36	Foregut Epi	ASCC2
2.12761e-40	1.01959	0.658	0.187	4.72968e-36	Foregut Epi	VPS37B
4.99715e-40	1.07306	0.586	0.149	1.11087e-35	Foregut Epi	VSIR
5.0948e-39	1.81239	0.757	0.33	1.13257e-34	Foregut Epi	ANXA11
3.41144e-38	1.02342	0.577	0.148	7.58364e-34	Foregut Epi	SLC16A3
1.27404e-37	1.86404	0.865	0.537	2.83218e-33	Foregut Epi	SQSTM1
1.04476e-36	1.76485	0.676	0.23	2.32249e-32	Foregut Epi	SERPINB1
1.14608e-36	1.89389	0.811	0.503	2.54773e-32	Foregut Epi	TAX1BP1
5.40535e-36	2.72836	0.802	0.405	1.20161e-31	Foregut Epi	EMP1
1.79544e-35	1.61791	0.739	0.311	3.99126e-31	Foregut Epi	ABHD5
3.09063e-35	1.35979	0.495	0.121	6.87048e-31	Foregut Epi	TNFSF10
4.61336e-35	1.87416	0.766	0.397	1.02555e-30	Foregut Epi	TMOD3
1.1846e-33	1.13907	0.64	0.21	2.63337e-29	Foregut Epi	SH3YL1
2.70125e-33	1.28257	0.577	0.182	6.00488e-29	Foregut Epi	MGLL
2.77414e-33	1.34641	0.523	0.137	6.16691e-29	Foregut Epi	GCHFR
2.31919e-32	1.23126	0.423	0.094	5.15557e-28	Foregut Epi	UPP1
1.4351e-31	1.26669	0.694	0.273	3.19022e-27	Foregut Epi	GLTP
1.7271e-31	1.33851	0.649	0.25	3.83935e-27	Foregut Epi	TSPAN6
1.79333e-31	1.05189	0.694	0.269	3.98657e-27	Foregut Epi	UBL3
1.24368e-30	1.55307	0.685	0.244	2.76471e-26	Foregut Epi	CD24
1.34223e-30	1.05404	0.658	0.238	2.98377e-26	Foregut Epi	TMEM159
2.13499e-30	1.2337	0.703	0.279	4.74608e-26	Foregut Epi	SPSB3
3.7768e-30	1.02365	0.495	0.138	8.39583e-26	Foregut Epi	SRD5A3
7.47904e-30	1.01991	0.694	0.298	1.66259e-25	Foregut Epi	MIEN1
7.80758e-30	1.37652	0.739	0.352	1.73563e-25	Foregut Epi	BAG1
8.25986e-30	1.12537	0.694	0.276	1.83617e-25	Foregut Epi	ATP6V1E1
1.27946e-29	1.83855	0.766	0.376	2.84424e-25	Foregut Epi	BLVRB
1.75634e-29	1.04576	0.486	0.129	3.90434e-25	Foregut Epi	PMAIP1
4.45113e-29	1.21521	0.73	0.348	9.89487e-25	Foregut Epi	RAB5IF
4.75249e-29	1.1448	0.586	0.189	1.05648e-24	Foregut Epi	RAB5B
8.78154e-29	1.00857	0.64	0.237	1.95214e-24	Foregut Epi	CLIP1
1.35452e-28	1.14526	0.721	0.301	3.0111e-24	Foregut Epi	TJP1
1.81154e-28	1.17182	0.658	0.232	4.02705e-24	Foregut Epi	HMGA1
3.30538e-28	1.47636	0.495	0.147	7.34786e-24	Foregut Epi	SGTA
1.4452e-27	1.08357	0.468	0.129	3.21267e-23	Foregut Epi	MGST1
3.74313e-26	1.23226	0.694	0.345	8.32097e-22	Foregut Epi	CLINT1
5.73351e-26	1.55263	0.613	0.236	1.27456e-21	Foregut Epi	DUSP5
9.48857e-26	1.26429	0.757	0.35	2.10931e-21	Foregut Epi	METRNL
2.18054e-25	1.27986	0.739	0.406	4.84734e-21	Foregut Epi	ARF6
4.04135e-25	1.1477	0.676	0.288	8.98393e-21	Foregut Epi	PLS3
4.62506e-25	1.10653	0.748	0.408	1.02815e-20	Foregut Epi	RALBP1
6.18001e-25	1.07011	0.676	0.277	1.37382e-20	Foregut Epi	UBE2D1
1.27472e-24	1.81184	0.703	0.342	2.8337e-20	Foregut Epi	CD9
3.05913e-24	2.17878	0.586	0.222	6.80045e-20	Foregut Epi	ADIRF
7.10478e-24	1.22627	0.667	0.288	1.57939e-19	Foregut Epi	CD55
4.06664e-23	1.03184	0.667	0.285	9.04014e-19	Foregut Epi	TOR1AIP2
4.77787e-23	1.96403	0.676	0.33	1.06212e-18	Foregut Epi	S100A16
2.3814e-22	1.04135	0.523	0.184	5.29385e-18	Foregut Epi	MDM2
5.19055e-22	1.05986	0.658	0.307	1.15386e-17	Foregut Epi	PLIN3
2.61362e-21	1.17866	0.712	0.384	5.81008e-17	Foregut Epi	SMS
1.11893e-20	1.27185	0.712	0.411	2.48739e-16	Foregut Epi	CLTB
6.13044e-20	1.0562	0.514	0.19	1.3628e-15	Foregut Epi	NDRG1
6.91376e-19	1.30445	0.649	0.29	1.53693e-14	Foregut Epi	IER5
4.05952e-18	1.08327	0.622	0.294	9.02432e-14	Foregut Epi	GALNT1
1.95996e-17	1.50144	0.631	0.297	4.35699e-13	Foregut Epi	KATNBL1
2.38456e-15	1.47035	0.703	0.391	5.30087e-11	Foregut Epi	CDKN1A
3.88625e-13	1.21335	0.631	0.314	8.63912e-09	Foregut Epi	IDI1
0	4.6679	0.646	0.094	0	epithelial	SLPI
0	4.59099	0.762	0.107	0	epithelial	WFDC2
0	4.16115	0.871	0.122	0	epithelial	KRT19
0	3.56	0.484	0.047	0	epithelial	KRT17
0	3.10921	0.654	0.056	0	epithelial	AGR2
0	3.02219	0.403	0.017	0	epithelial	KRT15
0	2.826	0.864	0.127	0	epithelial	KRT8
0	2.81152	0.642	0.039	0	epithelial	TACSTD2
0	2.63401	0.662	0.078	0	epithelial	CLDN4
0	2.60682	0.853	0.148	0	epithelial	KRT18
0	2.48086	0.576	0.053	0	epithelial	ELF3
0	2.34348	0.458	0.021	0	epithelial	KRT7
0	2.34266	0.497	0.015	0	epithelial	CXCL17
0	2.22034	0.738	0.096	0	epithelial	PERP
0	2.01925	0.822	0.237	0	epithelial	SPINT2
0	1.96754	0.436	0.019	0	epithelial	FAM3D
0	1.95561	0.651	0.112	0	epithelial	MGST1
0	1.86384	0.659	0.047	0	epithelial	FXYD3
0	1.84582	0.443	0.058	0	epithelial	AQP3
0	1.77777	0.522	0.023	0	epithelial	S100A14
0	1.67349	0.693	0.061	0	epithelial	EPCAM
0	1.57771	0.571	0.068	0	epithelial	DSP
0	1.43941	0.441	0.034	0	epithelial	C19orf33
0	1.38546	0.587	0.026	0	epithelial	RAB25
0	1.32911	0.476	0.051	0	epithelial	CLDN7
0	1.31742	0.689	0.133	0	epithelial	TSTD1
0	1.30088	0.447	0.045	0	epithelial	CLDN3
0	1.25149	0.513	0.096	0	epithelial	KLF5
0	1.17613	0.522	0.08	0	epithelial	DMKN
0	1.08454	0.537	0.045	0	epithelial	SPINT1
0	1.08405	0.451	0.036	0	epithelial	MAL2
0	1.02176	0.401	0.037	0	epithelial	ANXA3
3.89967e-216	1.01362	0.622	0.167	8.66897e-212	epithelial	VAMP8
7.65363e-199	1.88711	0.747	0.33	1.7014e-194	epithelial	CD9
2.35788e-165	5.12761	0.441	0.125	5.24157e-161	epithelial	SCGB3A1
4.0581e-160	1.19509	0.487	0.137	9.02116e-156	epithelial	TM4SF1
0	4.86724	0.983	0.077	0	schwann cells	S100B
0	4.52239	0.901	0.014	0	schwann cells	MPZ
0	3.41499	0.875	0.154	0	schwann cells	PLP1
0	3.31131	0.841	0.039	0	schwann cells	MIA
0	3.27193	0.781	0.007	0	schwann cells	GFRA3
0	2.89874	0.831	0.004	0	schwann cells	CDH19
0	2.7887	0.778	0.103	0	schwann cells	NRXN1
0	2.26127	0.819	0.176	0	schwann cells	CADM1
0	2.0772	0.737	0.036	0	schwann cells	ERBB3
0	2.07541	0.653	0.089	0	schwann cells	SEMA3B
0	1.97094	0.547	0.004	0	schwann cells	FOXD3
0	1.96938	0.549	0.055	0	schwann cells	SCN7A
0	1.83223	0.682	0.083	0	schwann cells	SNCA
0	1.80903	0.619	0.009	0	schwann cells	SOX10
0	1.7531	0.429	0.016	0	schwann cells	PMP2
0	1.67862	0.629	0.029	0	schwann cells	CMTM5
0	1.67635	0.614	0.005	0	schwann cells	FOXD3-AS1
0	1.56838	0.581	0.081	0	schwann cells	HSPA12A
0	1.54999	0.455	0.015	0	schwann cells	XKR4
0	1.51323	0.552	0.02	0	schwann cells	MAL
0	1.32164	0.504	0.052	0	schwann cells	LGI4
0	1.24938	0.492	0.035	0	schwann cells	SLC35F1
0	1.22847	0.446	0.027	0	schwann cells	ASPA
0	1.19679	0.414	0.011	0	schwann cells	LINC01198
0	1.13691	0.414	0.012	0	schwann cells	RXRG
0	1.0679	0.41	0.007	0	schwann cells	INSC
2.15859e-291	1.83294	0.672	0.116	4.79854e-287	schwann cells	EDNRB
9.26303e-272	2.52233	0.935	0.311	2.05917e-267	schwann cells	GPM6B
3.15644e-260	1.46309	0.588	0.091	7.01677e-256	schwann cells	ITGA6
1.46759e-258	3.88692	0.855	0.264	3.26245e-254	schwann cells	CRYAB
7.65803e-255	2.30447	0.795	0.213	1.70238e-250	schwann cells	TSC22D4
3.17238e-246	1.43967	0.68	0.129	7.0522e-242	schwann cells	TTYH1
8.49865e-244	1.87726	0.696	0.156	1.88925e-239	schwann cells	PLEKHA4
8.89602e-232	1.00301	0.419	0.052	1.97759e-227	schwann cells	FIGN
3.56271e-227	1.07882	0.455	0.063	7.91991e-223	schwann cells	GAS2L3
3.23768e-223	2.08219	0.8	0.25	7.19737e-219	schwann cells	PDLIM4
4.39494e-208	1.24877	0.402	0.052	9.76995e-204	schwann cells	RELN
4.34935e-206	1.06841	0.414	0.055	9.66861e-202	schwann cells	CHL1
7.61214e-188	1.51729	0.66	0.174	1.69218e-183	schwann cells	CNP
6.25974e-183	1.64426	0.786	0.255	1.39154e-178	schwann cells	AP1S2
4.44444e-180	2.40432	0.79	0.309	9.87998e-176	schwann cells	METRN
7.17477e-178	1.19493	0.436	0.071	1.59495e-173	schwann cells	GATM
1.48721e-177	1.09099	0.41	0.064	3.30607e-173	schwann cells	SLC15A3
1.47555e-170	2.63325	0.928	0.495	3.28015e-166	schwann cells	PMP22
1.36957e-169	1.2469	0.569	0.132	3.04456e-165	schwann cells	GAS7
4.50092e-168	1.56092	0.504	0.102	1.00055e-163	schwann cells	OLFML2A
3.95155e-166	1.35026	0.573	0.137	8.78429e-162	schwann cells	VWA1
1.75851e-148	1.87982	0.846	0.415	3.90916e-144	schwann cells	ARPC1B
3.07066e-147	1.02072	0.443	0.089	6.82607e-143	schwann cells	AFAP1L2
2.70279e-145	1.61363	0.834	0.335	6.00831e-141	schwann cells	CD9
9.98244e-145	1.10352	0.429	0.084	2.2191e-140	schwann cells	SORBS1
1.05405e-144	1.26118	0.602	0.157	2.34315e-140	schwann cells	PLAT
3.07223e-138	1.7598	0.867	0.449	6.82956e-134	schwann cells	FXYD1
8.37709e-130	1.82696	0.771	0.36	1.86223e-125	schwann cells	DST
1.99035e-128	1.10749	0.506	0.126	4.42454e-124	schwann cells	KHDRBS3
1.84371e-124	1.16284	0.475	0.116	4.09858e-120	schwann cells	NGFR
3.88162e-120	1.63031	0.602	0.198	8.62885e-116	schwann cells	TMEM176A
2.57743e-115	1.00191	0.561	0.169	5.72963e-111	schwann cells	PCBP4
9.38261e-109	1.4672	0.79	0.418	2.08576e-104	schwann cells	EMP2
1.54218e-103	1.14537	0.504	0.156	3.42826e-99	schwann cells	C1orf198
2.86499e-103	1.57152	0.696	0.29	6.36887e-99	schwann cells	COL18A1
3.13432e-103	1.09075	0.651	0.249	6.96758e-99	schwann cells	CSRP1
3.22857e-102	1.12349	0.501	0.149	7.1771e-98	schwann cells	PLA2G16
1.35935e-101	1.42369	0.749	0.35	3.02183e-97	schwann cells	LAMB1
5.89742e-100	1.16055	0.482	0.138	1.311e-95	schwann cells	HBEGF
1.10179e-99	1.19844	0.641	0.281	2.44929e-95	schwann cells	SCCPDH
6.48228e-98	1.26885	0.569	0.207	1.44101e-93	schwann cells	CTNNAL1
2.40001e-97	1.05869	0.504	0.158	5.33523e-93	schwann cells	SDC3
2.06855e-96	1.46995	0.419	0.113	4.59839e-92	schwann cells	ITGB8
1.99676e-94	1.24212	0.655	0.284	4.4388e-90	schwann cells	CXXC5
8.69114e-93	1.1509	0.793	0.452	1.93204e-88	schwann cells	COMT
9.88063e-93	1.35012	0.595	0.232	2.19646e-88	schwann cells	TGFBR2
1.00924e-91	1.33505	0.48	0.148	2.24355e-87	schwann cells	NTM
1.92658e-91	1.35826	0.843	0.511	4.28279e-87	schwann cells	ZEB2
3.03227e-90	1.33677	0.761	0.422	6.74073e-86	schwann cells	PRNP
5.38875e-90	1.60818	0.798	0.46	1.19792e-85	schwann cells	PMEPA1
1.27701e-89	1.08081	0.453	0.131	2.8388e-85	schwann cells	PDGFA
5.17868e-89	1.36628	0.588	0.219	1.15122e-84	schwann cells	FST
4.76246e-88	1.24932	0.535	0.19	1.0587e-83	schwann cells	MATN2
3.61493e-86	1.27189	0.59	0.248	8.03599e-82	schwann cells	NDRG2
7.74137e-86	1.06413	0.487	0.16	1.72091e-81	schwann cells	CREB5
1.561e-84	1.20163	0.561	0.228	3.47009e-80	schwann cells	SECISBP2L
8.15e-81	1.40419	0.569	0.223	1.81174e-76	schwann cells	TMEM176B
2.58659e-76	1.10696	0.764	0.459	5.74999e-72	schwann cells	QKI
2.23251e-75	1.0446	0.643	0.322	4.96287e-71	schwann cells	TAX1BP3
5.1527e-75	1.00923	0.475	0.174	1.14544e-70	schwann cells	DAG1
1.37721e-71	1.42509	0.545	0.229	3.06153e-67	schwann cells	TNFRSF12A
2.64318e-69	1.02874	0.506	0.203	5.87578e-65	schwann cells	TLE1
0	3.79273	0.861	0.062	0	pericytes	RGS5
0	3.61336	0.828	0.262	0	pericytes	ACTA2
0	3.21898	0.892	0.337	0	pericytes	TAGLN
0	3.15794	0.734	0.174	0	pericytes	ADIRF
0	2.79933	0.78	0.111	0	pericytes	NDUFA4L2
0	2.70293	0.926	0.46	0	pericytes	MYL9
0	2.5847	0.933	0.434	0	pericytes	COL4A1
0	2.50951	0.919	0.38	0	pericytes	MT2A
0	2.41694	0.942	0.483	0	pericytes	COL4A2
0	2.37332	0.98	0.57	0	pericytes	IGFBP7
0	2.35129	0.778	0.341	0	pericytes	C11orf96
0	2.35037	0.797	0.066	0	pericytes	TINAGL1
0	2.30291	0.938	0.553	0	pericytes	TPM2
0	2.2398	0.816	0.12	0	pericytes	MCAM
0	2.23246	0.615	0.169	0	pericytes	RGS16
0	2.20847	0.636	0.014	0	pericytes	HIGD1B
0	2.08098	0.837	0.226	0	pericytes	NOTCH3
0	2.06415	0.777	0.136	0	pericytes	ITGA1
0	2.05004	0.463	0.094	0	pericytes	FABP4
0	2.01355	0.8	0.272	0	pericytes	PDGFRB
0	2.00693	0.727	0.17	0	pericytes	PPP1R14A
0	1.98747	0.916	0.492	0	pericytes	TPM1
0	1.93506	0.792	0.249	0	pericytes	COL18A1
0	1.93434	0.479	0.021	0	pericytes	STEAP4
0	1.8872	0.617	0.062	0	pericytes	ABCC9
0	1.87046	0.505	0.075	0	pericytes	CARMN
0	1.86644	0.866	0.241	0	pericytes	CAV1
0	1.80705	0.687	0.063	0	pericytes	2022-09-04
0	1.76456	0.915	0.441	0	pericytes	NR2F2
0	1.7308	0.586	0.039	0	pericytes	FAM162B
0	1.71642	0.684	0.193	0	pericytes	MYO1B
0	1.70618	0.603	0.058	0	pericytes	KCNJ8
0	1.68219	0.728	0.162	0	pericytes	PDLIM1
0	1.68133	0.78	0.229	0	pericytes	MEF2C
0	1.64897	0.793	0.31	0	pericytes	MFGE8
0	1.61438	0.849	0.433	0	pericytes	TIMP3
0	1.60331	0.809	0.228	0	pericytes	A2M
0	1.5714	0.707	0.159	0	pericytes	MYLK
0	1.55909	0.642	0.107	0	pericytes	CCDC102B
0	1.54808	0.783	0.428	0	pericytes	THY1
0	1.53026	0.555	0.104	0	pericytes	MT1E
0	1.52887	0.495	0.009	0	pericytes	AVPR1A
0	1.49254	0.824	0.431	0	pericytes	PMEPA1
0	1.49124	0.485	0.016	0	pericytes	COX4I2
0	1.47594	0.76	0.262	0	pericytes	EPS8
0	1.46839	0.475	0.132	0	pericytes	TCIM
0	1.45816	0.549	0.052	0	pericytes	ENPEP
0	1.45062	0.692	0.292	0	pericytes	UACA
0	1.44876	0.839	0.418	0	pericytes	LHFPL6
0	1.41467	0.509	0.026	0	pericytes	GJA4
0	1.40919	0.575	0.088	0	pericytes	GUCY1A2
0	1.40865	0.493	0.097	0	pericytes	SYNPO2
0	1.37994	0.917	0.501	0	pericytes	PLAC9
0	1.2946	0.645	0.249	0	pericytes	FILIP1L
0	1.29298	0.735	0.289	0	pericytes	TGFB1I1
0	1.28758	0.647	0.141	0	pericytes	GUCY1A1
0	1.28215	0.736	0.308	0	pericytes	MYH9
0	1.26892	0.57	0.069	0	pericytes	ANGPT2
0	1.25785	0.866	0.455	0	pericytes	BGN
0	1.24637	0.488	0.089	0	pericytes	COL5A3
0	1.24123	0.508	0.161	0	pericytes	BCAM
0	1.2338	0.47	0.1	0	pericytes	GJC1
0	1.23219	0.532	0.098	0	pericytes	PDGFA
0	1.232	0.673	0.255	0	pericytes	DLC1
0	1.22464	0.884	0.512	0	pericytes	CPE
0	1.22443	0.653	0.234	0	pericytes	EBF1
0	1.21127	0.511	0.09	0	pericytes	TBX2
0	1.16688	0.63	0.188	0	pericytes	CYTOR
0	1.11861	0.56	0.1	0	pericytes	GUCY1B1
0	1.1093	0.625	0.284	0	pericytes	ISYNA1
0	1.08326	0.499	0.166	0	pericytes	CRISPLD2
0	1.07652	0.516	0.157	0	pericytes	GGT5
0	1.06679	0.504	0.096	0	pericytes	EPAS1
0	1.03422	0.456	0.092	0	pericytes	ARHGEF17
0	1.01669	0.542	0.194	0	pericytes	OLFML2B
0	1.01561	0.529	0.176	0	pericytes	PRKG1
0	1.01546	0.663	0.293	0	pericytes	CRIP2
6.52332e-305	1.09511	0.634	0.302	1.45013e-300	pericytes	VCL
9.70408e-293	1.25062	0.553	0.227	2.15722e-288	pericytes	CSRP1
1.68956e-274	1.02321	0.682	0.354	3.7559e-270	pericytes	EPHX1
1.83316e-265	1.44374	0.793	0.475	4.07512e-261	pericytes	COL6A3
2.41017e-255	1.1543	0.716	0.414	5.3578e-251	pericytes	FLNA
1.64118e-250	1.08685	0.721	0.403	3.64835e-246	pericytes	PHLDA1
2.33922e-250	1.01334	0.715	0.391	5.20009e-246	pericytes	LAMA4
0	2.21043	0.82	0.342	0	MSC/Fib	ELN
0	1.95802	0.939	0.462	0	MSC/Fib	FBLN1
0	1.67988	0.703	0.35	0	MSC/Fib	POSTN
0	1.64558	0.883	0.335	0	MSC/Fib	OGN
0	1.49466	0.819	0.324	0	MSC/Fib	COL14A1
0	1.46286	0.932	0.608	0	MSC/Fib	MGP
0	1.45222	0.95	0.457	0	MSC/Fib	LUM
0	1.38782	0.99	0.532	0	MSC/Fib	DCN
0	1.36114	0.557	0.206	0	MSC/Fib	ASPN
0	1.35759	0.844	0.419	0	MSC/Fib	CCDC80
0	1.34882	0.752	0.35	0	MSC/Fib	SFRP2
0	1.29751	0.943	0.491	0	MSC/Fib	PCOLCE
0	1.26813	0.799	0.453	0	MSC/Fib	IGFBP5
0	1.24795	0.893	0.459	0	MSC/Fib	SERPINF1
0	1.1977	0.631	0.212	0	MSC/Fib	PDGFRL
0	1.18749	0.883	0.385	0	MSC/Fib	MFAP4
0	1.18662	0.842	0.386	0	MSC/Fib	MMP2
0	1.17531	0.704	0.335	0	MSC/Fib	SRPX
0	1.15907	0.889	0.466	0	MSC/Fib	COL5A2
0	1.14995	0.842	0.393	0	MSC/Fib	COL5A1
0	1.1312	0.815	0.363	0	MSC/Fib	C1R
0	1.12667	0.845	0.408	0	MSC/Fib	MFAP2
0	1.11425	0.708	0.317	0	MSC/Fib	IGF1
0	1.03194	0.884	0.528	0	MSC/Fib	FSTL1
0	1.02782	0.715	0.369	0	MSC/Fib	FBN1
0	1.01262	0.869	0.501	0	MSC/Fib	VCAN
0	1.42847	0.41	0.015	0	Chondrogenic MSC/Fibro	COL11A2
6.88308e-290	2.68492	0.695	0.08	1.53011e-285	Chondrogenic MSC/Fibro	WIF1
2.93818e-275	2.356	0.621	0.068	6.53157e-271	Chondrogenic MSC/Fibro	COL9A2
1.40982e-222	1.78629	0.457	0.043	3.13404e-218	Chondrogenic MSC/Fibro	ACAN
1.96774e-218	2.80338	0.484	0.049	4.37428e-214	Chondrogenic MSC/Fibro	MIA
7.82352e-178	1.9934	0.43	0.047	1.73917e-173	Chondrogenic MSC/Fibro	MATN4
1.94783e-176	1.46202	0.496	0.063	4.33003e-172	Chondrogenic MSC/Fibro	BMP5
1.17101e-175	2.30254	0.66	0.118	2.60315e-171	Chondrogenic MSC/Fibro	HAPLN1
1.42189e-169	3.03642	0.859	0.246	3.16087e-165	Chondrogenic MSC/Fibro	C2orf40
2.81804e-138	2.04806	0.637	0.143	6.2645e-134	Chondrogenic MSC/Fibro	CRISPLD1
5.80764e-110	2.54275	0.605	0.156	1.29104e-105	Chondrogenic MSC/Fibro	COL9A3
6.62369e-97	1.59177	0.559	0.132	1.47245e-92	Chondrogenic MSC/Fibro	COL8A1
1.49491e-90	1.40205	0.445	0.091	3.32318e-86	Chondrogenic MSC/Fibro	SCRG1
1.59776e-81	1.75173	0.992	0.657	3.55182e-77	Chondrogenic MSC/Fibro	MGP
5.89768e-74	2.19531	0.77	0.344	1.31105e-69	Chondrogenic MSC/Fibro	CLU
8.08668e-72	2.65692	0.5	0.139	1.79767e-67	Chondrogenic MSC/Fibro	CYTL1
1.67002e-66	1.45905	0.52	0.159	3.71246e-62	Chondrogenic MSC/Fibro	TMEM100
4.57979e-57	1.49606	0.77	0.363	1.01809e-52	Chondrogenic MSC/Fibro	CFH
1.83713e-55	1.15154	0.852	0.411	4.08393e-51	Chondrogenic MSC/Fibro	SFRP2
4.20997e-51	1.47004	0.441	0.138	9.35876e-47	Chondrogenic MSC/Fibro	COL11A1
5.53956e-47	1.07883	0.863	0.459	1.23144e-42	Chondrogenic MSC/Fibro	PRRX1
3.78521e-45	1.09527	0.82	0.456	8.41452e-41	Chondrogenic MSC/Fibro	MMP2
6.34049e-29	1.13764	0.711	0.401	1.40949e-24	Chondrogenic MSC/Fibro	COL14A1
0	2.14315	0.708	0.09	0	meningeal fibroblast	CLDN11
0	1.95745	0.733	0.031	0	meningeal fibroblast	C16orf89
0	1.68227	0.843	0.065	0	meningeal fibroblast	ZIC1
0	1.49685	0.443	0.005	0	meningeal fibroblast	SLC6A13
0	1.37986	0.472	0.018	0	meningeal fibroblast	SLC7A11
0	1.20545	0.673	0.052	0	meningeal fibroblast	ZIC2
0	1.0746	0.475	0.01	0	meningeal fibroblast	CEMIP
1.25265e-284	1.33675	0.764	0.118	2.78465e-280	meningeal fibroblast	GMDS
8.52931e-280	1.68269	0.836	0.147	1.89607e-275	meningeal fibroblast	FOXC1
1.036e-250	1.53364	0.626	0.085	2.30303e-246	meningeal fibroblast	ITIH5
1.34984e-229	1.77489	0.607	0.087	3.00069e-225	meningeal fibroblast	ATP1A2
3.0751e-214	1.62149	0.818	0.165	6.83595e-210	meningeal fibroblast	CYP1B1
9.99599e-184	1.13691	0.538	0.079	2.22211e-179	meningeal fibroblast	DSP
1.91833e-180	1.84463	0.786	0.181	4.26445e-176	meningeal fibroblast	CTHRC1
1.87591e-179	1.27931	0.541	0.079	4.17015e-175	meningeal fibroblast	C7
2.97475e-169	1.89367	0.855	0.255	6.61287e-165	meningeal fibroblast	ISLR
3.76277e-166	5.31449	0.78	0.218	8.36463e-162	meningeal fibroblast	PTGDS
3.33965e-156	1.80167	0.604	0.115	7.42404e-152	meningeal fibroblast	SFRP4
1.98222e-154	1.29164	0.824	0.221	4.40647e-150	meningeal fibroblast	ARHGAP29
2.48269e-142	3.35428	0.865	0.341	5.51901e-138	meningeal fibroblast	CLU
2.71473e-140	1.49933	0.843	0.281	6.03483e-136	meningeal fibroblast	NBL1
5.97505e-140	2.88179	0.972	0.568	1.32825e-135	meningeal fibroblast	PTN
6.09458e-137	2.05325	0.95	0.418	1.35483e-132	meningeal fibroblast	IGFBP2
1.23481e-136	2.05064	0.906	0.391	2.74498e-132	meningeal fibroblast	RBP1
1.99951e-129	1.67018	0.453	0.078	4.44492e-125	meningeal fibroblast	GDF15
8.44162e-127	1.01417	0.604	0.134	1.87657e-122	meningeal fibroblast	COL11A1
2.83515e-117	1.82575	0.651	0.164	6.30253e-113	meningeal fibroblast	NDUFA4L2
4.04656e-115	1.56962	0.893	0.37	8.99551e-111	meningeal fibroblast	PLTP
5.49243e-100	1.58721	0.774	0.27	1.22097e-95	meningeal fibroblast	APOD
9.79371e-91	1.70014	0.789	0.31	2.17714e-86	meningeal fibroblast	IGFBP6
3.62547e-88	1.17134	0.704	0.251	8.05943e-84	meningeal fibroblast	SPINT2
4.81286e-87	1.49155	0.921	0.483	1.0699e-82	meningeal fibroblast	OLFML3
4.67689e-86	1.23327	0.748	0.283	1.03967e-81	meningeal fibroblast	JAM2
6.82722e-86	1.45158	0.855	0.395	1.51769e-81	meningeal fibroblast	AKAP12
5.90407e-82	1.1274	0.937	0.524	1.31248e-77	meningeal fibroblast	TPM1
9.71786e-74	1.1087	0.601	0.204	2.16028e-69	meningeal fibroblast	VAMP5
4.38939e-72	1.02143	0.909	0.572	9.75762e-68	meningeal fibroblast	VKORC1
1.28676e-69	1.39837	0.909	0.516	2.86048e-65	meningeal fibroblast	FN1
9.52766e-69	1.09245	0.509	0.155	2.118e-64	meningeal fibroblast	PHLDA2
4.79296e-63	1.68116	0.975	0.656	1.06548e-58	meningeal fibroblast	MGP
1.37881e-60	1.04803	0.858	0.492	3.06509e-56	meningeal fibroblast	SLC3A2
2.72812e-60	1.10368	0.887	0.465	6.06461e-56	meningeal fibroblast	TIMP3
1.59151e-57	1.19679	0.547	0.197	3.53792e-53	meningeal fibroblast	IFITM1
1.43356e-51	1.01918	0.987	0.601	3.18681e-47	meningeal fibroblast	DCN
1.9596e-51	1.13309	0.937	0.56	4.35619e-47	meningeal fibroblast	PCOLCE
5.56511e-50	1.03308	0.915	0.568	1.23712e-45	meningeal fibroblast	APOE
1.43493e-48	1.23068	0.72	0.374	3.18986e-44	meningeal fibroblast	RAMP2
1.02955e-41	1.02358	0.846	0.504	2.28869e-37	meningeal fibroblast	CLEC11A
0	1.98642	0.904	0.042	0	cardiomyocyte/myoFib	PITX2
0	1.78389	0.781	0.096	0	cardiomyocyte/myoFib	MME
0	1.61078	0.778	0.089	0	cardiomyocyte/myoFib	BAMBI
0	1.02333	0.659	0.042	0	cardiomyocyte/myoFib	HAND2-AS1
0	1.01198	0.662	0.062	0	cardiomyocyte/myoFib	HAND2
6.25068e-298	1.13656	0.662	0.077	1.38953e-293	cardiomyocyte/myoFib	PITX1
3.04758e-248	1.0498	0.534	0.06	6.77477e-244	cardiomyocyte/myoFib	TPD52L1
4.92504e-234	1.78693	0.884	0.196	1.09484e-229	cardiomyocyte/myoFib	GJA1
7.73644e-225	1.63198	0.836	0.179	1.71981e-220	cardiomyocyte/myoFib	PLOD2
3.22164e-219	1.87381	0.489	0.057	7.1617e-215	cardiomyocyte/myoFib	TFPI2
4.61844e-218	1.73029	0.865	0.187	1.02668e-213	cardiomyocyte/myoFib	CRISPLD2
5.42615e-217	1.79181	0.727	0.138	1.20623e-212	cardiomyocyte/myoFib	PDPN
8.89848e-217	1.63918	0.823	0.175	1.97813e-212	cardiomyocyte/myoFib	LMCD1
5.00665e-205	4.04678	0.81	0.205	1.11298e-200	cardiomyocyte/myoFib	DLK1
1.14034e-190	2.1146	0.804	0.192	2.53498e-186	cardiomyocyte/myoFib	COL15A1
3.77725e-172	1.72748	0.746	0.176	8.39682e-168	cardiomyocyte/myoFib	FMOD
1.33528e-171	1.07444	0.736	0.155	2.96833e-167	cardiomyocyte/myoFib	MAN1A1
1.11744e-166	1.28853	0.717	0.154	2.48406e-162	cardiomyocyte/myoFib	COL9A3
1.0386e-164	1.79214	0.617	0.12	2.30881e-160	cardiomyocyte/myoFib	DKK2
4.01598e-164	1.6728	0.765	0.188	8.92752e-160	cardiomyocyte/myoFib	MATN2
2.15666e-162	1.63197	0.871	0.253	4.79425e-158	cardiomyocyte/myoFib	SLIT3
8.88323e-155	1.44895	0.489	0.078	1.97474e-150	cardiomyocyte/myoFib	TMEM88
2.27686e-153	1.41214	0.785	0.2	5.06147e-149	cardiomyocyte/myoFib	TGFBI
3.07131e-142	2.22462	0.958	0.459	6.82753e-138	cardiomyocyte/myoFib	COL5A1
1.06105e-134	2.06503	0.981	0.532	2.35871e-130	cardiomyocyte/myoFib	LUM
3.28137e-134	2.41868	0.733	0.207	7.29448e-130	cardiomyocyte/myoFib	IGFBP3
2.66905e-133	2.17192	0.997	0.601	5.93329e-129	cardiomyocyte/myoFib	DCN
3.52246e-130	1.94669	0.92	0.37	7.83042e-126	cardiomyocyte/myoFib	PLTP
6.45802e-128	1.34144	0.476	0.086	1.43562e-123	cardiomyocyte/myoFib	C1QTNF3
2.32751e-127	2.21709	0.965	0.507	5.17406e-123	cardiomyocyte/myoFib	CDKN1C
2.32983e-125	1.48476	0.653	0.158	5.1792e-121	cardiomyocyte/myoFib	PLAT
6.99438e-123	1.50393	0.878	0.31	1.55485e-118	cardiomyocyte/myoFib	MMP23B
3.58818e-122	1.44134	0.781	0.235	7.97653e-118	cardiomyocyte/myoFib	SPON2
8.69388e-117	1.11515	0.871	0.334	1.93265e-112	cardiomyocyte/myoFib	GPX8
1.90536e-114	1.18277	0.717	0.198	4.23561e-110	cardiomyocyte/myoFib	TMEM176A
2.3401e-112	1.51177	0.875	0.352	5.20203e-108	cardiomyocyte/myoFib	PHACTR2
4.8038e-109	2.38755	0.691	0.219	1.06789e-104	cardiomyocyte/myoFib	PTGDS
4.13484e-107	1.1673	0.768	0.253	9.19174e-103	cardiomyocyte/myoFib	SLC40A1
7.13597e-105	1.16859	0.727	0.222	1.58633e-100	cardiomyocyte/myoFib	LOXL1
3.62179e-102	1.45172	0.749	0.245	8.05124e-98	cardiomyocyte/myoFib	EGFL6
8.67165e-102	1.062	0.855	0.314	1.92771e-97	cardiomyocyte/myoFib	MRC2
7.34374e-100	1.19193	0.884	0.395	1.63251e-95	cardiomyocyte/myoFib	CKAP4
8.21897e-100	2.12476	0.939	0.46	1.82708e-95	cardiomyocyte/myoFib	MFAP4
5.8349e-99	1.17504	0.717	0.222	1.2971e-94	cardiomyocyte/myoFib	TMEM176B
2.86674e-92	1.08323	0.855	0.38	6.37277e-88	cardiomyocyte/myoFib	FKBP10
3.28004e-92	1.42085	0.99	0.651	7.29153e-88	cardiomyocyte/myoFib	COL6A2
1.37838e-91	1.24081	0.537	0.136	3.06415e-87	cardiomyocyte/myoFib	NNMT
1.39985e-87	1.10176	0.884	0.382	3.11187e-83	cardiomyocyte/myoFib	LGALS3BP
2.20696e-86	1.39628	0.984	0.62	4.90608e-82	cardiomyocyte/myoFib	COL6A1
3.48864e-83	1.22822	0.961	0.529	7.75525e-79	cardiomyocyte/myoFib	COL5A2
9.12995e-83	1.17116	0.82	0.358	2.02959e-78	cardiomyocyte/myoFib	COPZ2
7.23462e-82	1.26155	0.862	0.392	1.60826e-77	cardiomyocyte/myoFib	RBP1
1.28759e-80	1.89624	0.923	0.516	2.86232e-76	cardiomyocyte/myoFib	FN1
5.2011e-79	1.40305	0.402	0.091	1.1562e-74	cardiomyocyte/myoFib	SLC2A1
9.90083e-73	1.37426	0.878	0.438	2.20095e-68	cardiomyocyte/myoFib	IL6ST
1.78635e-72	1.5313	0.849	0.402	3.97106e-68	cardiomyocyte/myoFib	POSTN
2.50241e-72	2.23576	0.659	0.253	5.56285e-68	cardiomyocyte/myoFib	FRZB
2.58982e-72	1.21059	0.736	0.294	5.75717e-68	cardiomyocyte/myoFib	BST2
8.1065e-72	1.66167	0.891	0.498	1.80208e-67	cardiomyocyte/myoFib	COL6A3
8.38829e-72	1.35593	0.569	0.185	1.86472e-67	cardiomyocyte/myoFib	CTHRC1
1.61342e-71	1.3775	0.887	0.484	3.58664e-67	cardiomyocyte/myoFib	OLFML3
3.71796e-70	1.43961	0.518	0.158	8.26502e-66	cardiomyocyte/myoFib	GLIPR1
2.15174e-69	1.31536	0.942	0.631	4.78331e-65	cardiomyocyte/myoFib	PLD3
5.35217e-65	1.17215	0.752	0.324	1.18979e-60	cardiomyocyte/myoFib	ATP1B1
1.50158e-62	1.07261	0.492	0.154	3.33801e-58	cardiomyocyte/myoFib	ADAMTS9
4.7373e-53	1.22308	0.936	0.56	1.0531e-48	cardiomyocyte/myoFib	PCOLCE
7.77848e-42	1.07882	0.865	0.533	1.72916e-37	cardiomyocyte/myoFib	PLAC9
3.85713e-39	1.52974	0.64	0.338	8.57441e-35	cardiomyocyte/myoFib	SERPINE2
0	2.30902	0.776	0.099	0	myogenic progenitor cells	TCF21
0	2.11801	0.402	0.031	0	myogenic progenitor cells	PLA2G2A
0	1.63604	0.548	0.007	0	myogenic progenitor cells	PEG3
0	1.59334	0.6	0.037	0	myogenic progenitor cells	CPXM2
0	1.24032	0.481	0.013	0	myogenic progenitor cells	LHX9
0	1.18599	0.514	0.033	0	myogenic progenitor cells	COLEC11
0	1.14131	0.569	0.016	0	myogenic progenitor cells	NDN
0	1.1008	0.45	0.033	0	myogenic progenitor cells	KCNQ1OT1
5.10182e-283	2.20142	0.795	0.182	1.13413e-278	myogenic progenitor cells	SMOC2
6.33789e-268	2.16985	0.762	0.175	1.40891e-263	myogenic progenitor cells	QSOX1
2.5669e-267	1.67359	0.626	0.105	5.70621e-263	myogenic progenitor cells	TNXB
3.02158e-240	2.00967	0.779	0.205	6.71697e-236	myogenic progenitor cells	FHL2
5.08527e-232	1.42232	0.726	0.155	1.13046e-227	myogenic progenitor cells	PLAT
1.44101e-226	1.92732	0.786	0.197	3.20336e-222	myogenic progenitor cells	MYLK
3.8757e-225	2.00157	0.833	0.246	8.61568e-221	myogenic progenitor cells	FBLN5
3.98748e-211	1.0056	0.543	0.091	8.86417e-207	myogenic progenitor cells	CLDN11
1.08179e-208	2.36927	0.933	0.376	2.40481e-204	myogenic progenitor cells	TAGLN
2.43149e-206	2.33717	0.898	0.384	5.4052e-202	myogenic progenitor cells	AEBP1
8.52176e-200	2.05073	0.869	0.302	1.89439e-195	myogenic progenitor cells	ACTA2
1.90458e-198	1.02068	0.605	0.118	4.23388e-194	myogenic progenitor cells	PDLIM3
5.47891e-195	1.49416	0.743	0.195	1.21796e-190	myogenic progenitor cells	TMEM176A
4.96798e-194	1.17342	0.569	0.109	1.10438e-189	myogenic progenitor cells	LTBP2
4.38644e-190	1.6355	0.876	0.307	9.75106e-186	myogenic progenitor cells	MMP23B
2.97876e-187	1.98182	0.945	0.493	6.62177e-183	myogenic progenitor cells	MYL9
4.19848e-180	2.90249	0.812	0.301	9.33322e-176	myogenic progenitor cells	SFRP1
5.82681e-177	1.8271	0.743	0.216	1.2953e-172	myogenic progenitor cells	PTGDS
1.71926e-175	2.19247	0.95	0.581	3.8219e-171	myogenic progenitor cells	TPM2
5.71466e-173	2.52808	0.888	0.432	1.27037e-168	myogenic progenitor cells	HTRA1
6.67425e-173	1.94383	0.457	0.079	1.48369e-168	myogenic progenitor cells	C7
1.07055e-168	1.7493	0.85	0.38	2.37984e-164	myogenic progenitor cells	LGALS3BP
7.37823e-167	1.04001	0.581	0.128	1.64018e-162	myogenic progenitor cells	NEXN
7.14154e-164	1.73986	0.933	0.427	1.58756e-159	myogenic progenitor cells	C1R
1.49133e-160	1.05607	0.51	0.102	3.31523e-156	myogenic progenitor cells	SBSPON
8.54286e-157	1.32154	0.731	0.22	1.89908e-152	myogenic progenitor cells	TMEM176B
2.00178e-155	1.14958	0.443	0.08	4.44995e-151	myogenic progenitor cells	GPX3
1.20737e-154	1.60579	0.893	0.378	2.68399e-150	myogenic progenitor cells	C1S
6.40808e-150	1.49746	0.8	0.29	1.42452e-145	myogenic progenitor cells	BST2
1.5577e-146	1.58384	0.914	0.468	3.46277e-142	myogenic progenitor cells	RARRES2
2.40006e-138	1.14932	0.698	0.21	5.33533e-134	myogenic progenitor cells	PPP1R14A
4.45629e-136	1.14451	0.64	0.198	9.90632e-132	myogenic progenitor cells	TCEAL1
8.2809e-136	1.22277	0.44	0.088	1.84084e-131	myogenic progenitor cells	ACTG2
2.64144e-131	1.92686	0.952	0.6	5.87192e-127	myogenic progenitor cells	IGFBP7
1.05364e-121	1.53405	0.864	0.418	2.34224e-117	myogenic progenitor cells	IGFBP2
2.23199e-117	1.30742	0.91	0.522	4.96171e-113	myogenic progenitor cells	TPM1
9.09078e-107	1.15959	0.767	0.288	2.02088e-102	myogenic progenitor cells	CAV1
9.11084e-107	1.35314	0.876	0.452	2.02534e-102	myogenic progenitor cells	THY1
9.21092e-107	1.18341	0.736	0.329	2.04759e-102	myogenic progenitor cells	TCEAL3
4.13881e-103	1.00976	0.86	0.421	9.20057e-99	myogenic progenitor cells	NUPR1
2.62076e-102	1.28337	0.876	0.485	5.82594e-98	myogenic progenitor cells	SERPING1
1.07751e-101	1.10511	0.893	0.415	2.3953e-97	myogenic progenitor cells	OGN
3.61299e-99	1.53058	0.762	0.334	8.03168e-95	myogenic progenitor cells	SERPINE2
4.3048e-98	1.10017	0.705	0.276	9.56957e-94	myogenic progenitor cells	FILIP1L
6.20703e-98	1.41075	0.888	0.514	1.37982e-93	myogenic progenitor cells	FN1
1.45883e-95	1.12955	0.731	0.284	3.24298e-91	myogenic progenitor cells	THBS1
3.33983e-94	1.05564	0.857	0.396	7.42444e-90	myogenic progenitor cells	COL14A1
2.81583e-93	1.12058	0.936	0.588	6.2596e-89	myogenic progenitor cells	IGFBP4
1.69868e-91	1.15886	0.902	0.591	3.77616e-87	myogenic progenitor cells	TIMP2
1.80183e-90	1.04621	0.719	0.304	4.00547e-86	myogenic progenitor cells	EMILIN1
2.23692e-88	1.17865	0.95	0.619	4.97266e-84	myogenic progenitor cells	COL6A1
3.54594e-87	1.40234	0.8	0.435	7.88263e-83	myogenic progenitor cells	FLNA
7.72109e-86	1.0679	0.976	0.65	1.7164e-81	myogenic progenitor cells	COL6A2
1.54333e-80	1.09224	0.921	0.496	3.43083e-76	myogenic progenitor cells	COL6A3
3.26446e-76	1.07684	0.855	0.459	7.25689e-72	myogenic progenitor cells	COL5A1
4.96144e-60	1.03115	0.81	0.469	1.10293e-55	myogenic progenitor cells	CYR61
0	5.67226	0.994	0.088	0	smooth muscle cells	ACTG2
0	4.32676	0.88	0.047	0	smooth muscle cells	DES
0	3.93241	0.946	0.051	0	smooth muscle cells	MYH11
0	3.45361	0.916	0.075	0	smooth muscle cells	CNN1
0	1.74938	0.766	0.044	0	smooth muscle cells	KCNMB1
0	1.73875	0.82	0.066	0	smooth muscle cells	LMOD1
0	1.11928	0.581	0.02	0	smooth muscle cells	MYOCD
3.21131e-281	1.02824	0.497	0.026	7.13873e-277	smooth muscle cells	FENDRR
5.41902e-275	1.80688	0.473	0.024	1.20465e-270	smooth muscle cells	LINC01082
2.30976e-208	4.31482	1	0.202	5.1346e-204	smooth muscle cells	MYLK
3.97994e-206	2.19799	0.88	0.131	8.84741e-202	smooth muscle cells	NEXN
2.47622e-201	2.31961	0.85	0.122	5.50463e-197	smooth muscle cells	PDLIM3
4.61784e-177	1.17134	0.605	0.063	1.02655e-172	smooth muscle cells	CES1
3.38583e-156	1.93579	0.743	0.109	7.52669e-152	smooth muscle cells	CARMN
1.07935e-149	2.1931	0.844	0.169	2.39939e-145	smooth muscle cells	SLMAP
1.1481e-149	3.99129	1	0.308	2.55223e-145	smooth muscle cells	ACTA2
4.10775e-138	1.07454	0.587	0.074	9.13154e-134	smooth muscle cells	PGM5
1.15077e-132	1.10966	0.617	0.086	2.55817e-128	smooth muscle cells	SORBS1
1.6308e-130	4.07033	1	0.382	3.62527e-126	smooth muscle cells	TAGLN
4.70157e-128	1.72436	0.725	0.128	1.04516e-123	smooth muscle cells	SYNPO2
3.61985e-126	1.22997	0.497	0.058	8.04692e-122	smooth muscle cells	WFDC1
4.03951e-126	1.07135	0.557	0.073	8.97983e-122	smooth muscle cells	TGM2
8.1844e-124	1.51105	0.886	0.213	1.81939e-119	smooth muscle cells	RBPMS
4.75438e-119	1.20202	0.713	0.128	1.0569e-114	smooth muscle cells	MRGPRF
1.88716e-112	2.22658	0.892	0.251	4.19516e-108	smooth muscle cells	CSRP1
2.20792e-111	1.0108	0.491	0.063	4.9082e-107	smooth muscle cells	FOXF1
2.54729e-111	1.73927	0.551	0.081	5.66262e-107	smooth muscle cells	PITX1
1.04233e-110	1.94069	0.976	0.292	2.31711e-106	smooth muscle cells	CAV1
1.31475e-110	2.01755	0.946	0.325	2.9227e-106	smooth muscle cells	TGFB1I1
1.15595e-109	3.57544	0.994	0.526	2.56967e-105	smooth muscle cells	TPM1
5.62917e-109	3.968	0.988	0.498	1.25136e-104	smooth muscle cells	MYL9
9.23552e-108	1.84272	0.85	0.222	2.05306e-103	smooth muscle cells	HSPB6
9.50465e-108	3.8519	1	0.584	2.11288e-103	smooth muscle cells	TPM2
1.06542e-106	1.35811	0.731	0.152	2.36842e-102	smooth muscle cells	PPP1R12B
7.83263e-105	1.7203	0.509	0.074	1.74119e-100	smooth muscle cells	HHIP
4.00571e-103	1.5265	0.772	0.186	8.9047e-99	smooth muscle cells	SMTN
2.08362e-101	1.16837	0.743	0.161	4.63188e-97	smooth muscle cells	PCDH7
3.56348e-99	1.82271	0.934	0.334	7.92161e-95	smooth muscle cells	FHL1
3.29383e-94	1.04884	0.419	0.055	7.32219e-90	smooth muscle cells	KCNMA1
5.37572e-94	1.58815	0.832	0.215	1.19502e-89	smooth muscle cells	PPP1R14A
1.86265e-93	1.59688	0.904	0.326	4.14068e-89	smooth muscle cells	PDLIM7
1.66571e-76	1.50304	0.886	0.363	3.70286e-72	smooth muscle cells	PALLD
7.25037e-76	1.18038	0.545	0.106	1.61176e-71	smooth muscle cells	SBSPON
9.75651e-76	1.17851	0.743	0.211	2.16887e-71	smooth muscle cells	MSRB3
8.45531e-72	1.42702	0.862	0.339	1.87962e-67	smooth muscle cells	ACTN1
3.18962e-71	1.75222	0.982	0.518	7.09051e-67	smooth muscle cells	SPARCL1
4.90237e-71	1.91955	0.928	0.438	1.0898e-66	smooth muscle cells	FLNA
6.08104e-70	1.32835	0.443	0.079	1.35181e-65	smooth muscle cells	RAMP1
6.21884e-65	1.7203	0.892	0.405	1.38245e-60	smooth muscle cells	LPP
8.63844e-65	1.12418	0.754	0.241	1.92033e-60	smooth muscle cells	C9orf3
5.7302e-59	1.87628	0.898	0.4	1.27382e-54	smooth muscle cells	CKB
3.20997e-57	1.32197	0.85	0.417	7.13577e-53	smooth muscle cells	ILK
9.18596e-55	1.17629	0.557	0.148	2.04204e-50	smooth muscle cells	PDE5A
5.00378e-54	1.1527	0.808	0.328	1.11234e-49	smooth muscle cells	VCL
2.75087e-53	1.05932	0.749	0.273	6.11518e-49	smooth muscle cells	MAP3K20
1.20062e-52	1.08746	0.754	0.271	2.66898e-48	smooth muscle cells	CRYAB
2.64232e-49	1.60663	0.844	0.409	5.87388e-45	smooth muscle cells	CSRP2
3.41853e-48	1.02952	0.844	0.407	7.5994e-44	smooth muscle cells	FERMT2
4.0493e-48	1.11202	0.79	0.276	9.0016e-44	smooth muscle cells	A2M
2.18863e-47	1.27602	0.874	0.496	4.86533e-43	smooth muscle cells	PPP1R12A
4.87465e-38	1.06132	0.713	0.281	1.08363e-33	smooth muscle cells	FILIP1L
3.80202e-34	1.3819	0.868	0.559	8.45189e-30	smooth muscle cells	SELENOM
6.59159e-31	1.09294	0.461	0.155	1.46531e-26	smooth muscle cells	BCHE
3.24178e-30	1.05017	0.874	0.519	7.20647e-26	smooth muscle cells	FN1
3.39476e-29	1.05127	0.928	0.59	7.54655e-25	smooth muscle cells	TXNIP
4.02962e-22	1.21157	0.784	0.473	8.95784e-18	smooth muscle cells	CYR61
0	3.16662	0.599	0.234	0	Adipogenic MSC/Fib	CFD
0	3.00364	0.761	0.221	0	Adipogenic MSC/Fib	CXCL14
0	2.18487	0.567	0.208	0	Adipogenic MSC/Fib	APOD
0	1.85629	0.79	0.327	0	Adipogenic MSC/Fib	SFRP2
0	1.83194	0.869	0.398	0	Adipogenic MSC/Fib	CCDC80
0	1.82504	0.619	0.138	0	Adipogenic MSC/Fib	DPT
0	1.75785	0.773	0.287	0	Adipogenic MSC/Fib	IGF1
0	1.71062	0.497	0.096	0	Adipogenic MSC/Fib	MFAP5
0	1.56136	0.96	0.437	0	Adipogenic MSC/Fib	LUM
0	1.47838	0.989	0.515	0	Adipogenic MSC/Fib	DCN
0	1.3738	0.921	0.598	0	Adipogenic MSC/Fib	MGP
0	1.36545	0.848	0.312	0	Adipogenic MSC/Fib	GPC3
0	1.358	0.841	0.314	0	Adipogenic MSC/Fib	IL11RA
0	1.35655	0.78	0.365	0	Adipogenic MSC/Fib	ITM2A
0	1.28821	0.9	0.358	0	Adipogenic MSC/Fib	CTSK
0	1.27448	0.932	0.585	0	Adipogenic MSC/Fib	GSN
0	1.26569	0.774	0.304	0	Adipogenic MSC/Fib	SRPX
0	1.19914	0.951	0.473	0	Adipogenic MSC/Fib	PCOLCE
0	1.17639	0.986	0.577	0	Adipogenic MSC/Fib	COL6A2
0	1.15284	0.74	0.369	0	Adipogenic MSC/Fib	HTRA1
0	1.14761	0.914	0.477	0	Adipogenic MSC/Fib	VCAN
0	1.13369	0.909	0.52	0	Adipogenic MSC/Fib	IGFBP4
0	1.12552	0.673	0.249	0	Adipogenic MSC/Fib	CXCL12
0	1.11203	0.879	0.446	0	Adipogenic MSC/Fib	SERPINF1
0	1.10472	0.499	0.16	0	Adipogenic MSC/Fib	FST
0	1.09753	0.833	0.379	0	Adipogenic MSC/Fib	MFAP4
0	1.05972	0.889	0.362	0	Adipogenic MSC/Fib	PRRX1
0	1.04697	0.515	0.13	0	Adipogenic MSC/Fib	TWIST2
0	1.03047	0.662	0.298	0	Adipogenic MSC/Fib	CFH
0	1.0223	0.618	0.245	0	Adipogenic MSC/Fib	IGFBP6
0	1.01335	0.535	0.185	0	Adipogenic MSC/Fib	EGFL6
0	1.00812	0.782	0.308	0	Adipogenic MSC/Fib	CRABP2
0	2.52404	0.42	0.013	0	adipocyte	CA3
1.15439e-129	1.81699	0.613	0.083	2.56622e-125	adipocyte	PPP1R1B
5.80766e-95	1.25861	0.52	0.078	1.29104e-90	adipocyte	PPARG
1.02705e-85	1.66568	0.927	0.301	2.28313e-81	adipocyte	CFD
8.74997e-71	1.76608	0.647	0.16	1.94512e-66	adipocyte	TMEM100
4.21113e-66	2.00335	1	0.57	9.36133e-62	adipocyte	APOE
8.92969e-63	1.03471	0.427	0.077	1.98507e-58	adipocyte	PRR16
5.11957e-58	1.09088	0.42	0.079	1.13808e-53	adipocyte	CEBPA
2.22162e-51	1.41113	0.727	0.245	4.93867e-47	adipocyte	APOC1
3.37322e-51	1.05141	0.507	0.12	7.49866e-47	adipocyte	SOX9
3.03296e-39	1.11643	0.493	0.137	6.74227e-35	adipocyte	PTX3
5.14732e-34	1.3857	0.673	0.299	1.14425e-29	adipocyte	NOVA1
6.19841e-29	1.01729	0.467	0.156	1.37791e-24	adipocyte	HAS2
2.49883e-27	1.5969	0.473	0.17	5.55491e-23	adipocyte	RASD1
5.05468e-24	1.07156	0.887	0.559	1.12366e-19	adipocyte	VCAN
4.59897e-23	1.23435	0.673	0.366	1.02235e-18	adipocyte	CFH
0	1.65898	0.526	0.058	0	cancer stem cell	HMGA2
1.11902e-111	1.02731	0.481	0.156	2.48759e-107	cancer stem cell	PTCH1
2.07029e-110	1.09712	0.569	0.219	4.60226e-106	cancer stem cell	TBX3
2.1062e-83	1.09499	0.752	0.406	4.68209e-79	cancer stem cell	GPC3
1.18098e-57	1.87505	0.891	0.494	2.62532e-53	stem cell like	KLF4
9.95612e-53	2.09712	0.923	0.594	2.21324e-48	stem cell like	HSPA1B
4.51108e-38	1.59369	0.781	0.464	1.00281e-33	stem cell like	AC020916.1
1.54904e-36	1.77879	0.639	0.319	3.44352e-32	stem cell like	SOCS1
7.16531e-35	1.7833	0.732	0.424	1.59285e-30	stem cell like	IER5L
0	3.48926	0.944	0.047	0	Cycling Neural Prog/MSC	TOP2A
0	3.41312	0.906	0.068	0	Cycling Neural Prog/MSC	CENPF
0	3.21622	0.995	0.408	0	Cycling Neural Prog/MSC	HMGB2
0	3.15627	0.908	0.037	0	Cycling Neural Prog/MSC	UBE2C
0	3.00918	0.953	0.054	0	Cycling Neural Prog/MSC	NUSAP1
0	2.72656	0.909	0.133	0	Cycling Neural Prog/MSC	PTTG1
0	2.60681	0.874	0.023	0	Cycling Neural Prog/MSC	MKI67
0	2.47979	0.924	0.218	0	Cycling Neural Prog/MSC	SMC4
0	2.43494	0.883	0.087	0	Cycling Neural Prog/MSC	TYMS
0	2.34554	0.871	0.07	0	Cycling Neural Prog/MSC	PCLAF
0	2.29677	0.869	0.045	0	Cycling Neural Prog/MSC	CDK1
0	2.26598	0.853	0.037	0	Cycling Neural Prog/MSC	TPX2
0	2.08794	0.654	0.145	0	Cycling Neural Prog/MSC	HIST1H1D
0	2.08718	0.757	0.029	0	Cycling Neural Prog/MSC	ASPM
0	2.08076	0.645	0.044	0	Cycling Neural Prog/MSC	CCNB1
0	1.99015	0.89	0.237	0	Cycling Neural Prog/MSC	CKS2
0	1.95474	0.634	0.02	0	Cycling Neural Prog/MSC	HIST1H1B
0	1.94394	0.853	0.025	0	Cycling Neural Prog/MSC	BIRC5
0	1.88947	0.893	0.054	0	Cycling Neural Prog/MSC	MAD2L1
0	1.88	0.788	0.229	0	Cycling Neural Prog/MSC	KPNA2
0	1.86619	0.763	0.033	0	Cycling Neural Prog/MSC	CCNB2
0	1.85125	0.8	0.037	0	Cycling Neural Prog/MSC	CDKN3
0	1.83221	0.855	0.068	0	Cycling Neural Prog/MSC	UBE2T
0	1.80733	0.997	0.678	0	Cycling Neural Prog/MSC	STMN1
0	1.79303	0.968	0.544	0	Cycling Neural Prog/MSC	H2AFV
0	1.77845	0.806	0.098	0	Cycling Neural Prog/MSC	CKAP2
0	1.7558	0.886	0.264	0	Cycling Neural Prog/MSC	CKS1B
0	1.74444	0.587	0.019	0	Cycling Neural Prog/MSC	CDC20
0	1.74332	0.912	0.276	0	Cycling Neural Prog/MSC	TMPO
0	1.72227	0.84	0.018	0	Cycling Neural Prog/MSC	PBK
0	1.67159	0.961	0.611	0	Cycling Neural Prog/MSC	DEK
0	1.64994	0.649	0.028	0	Cycling Neural Prog/MSC	CENPE
0	1.64109	0.865	0.132	0	Cycling Neural Prog/MSC	SMC2
0	1.60996	0.81	0.189	0	Cycling Neural Prog/MSC	HMGB3
0	1.5758	0.881	0.306	0	Cycling Neural Prog/MSC	ANP32E
0	1.5686	0.732	0.014	0	Cycling Neural Prog/MSC	GTSE1
0	1.5682	0.674	0.011	0	Cycling Neural Prog/MSC	DLGAP5
0	1.53035	0.902	0.336	0	Cycling Neural Prog/MSC	H2AFX
0	1.52022	0.716	0.018	0	Cycling Neural Prog/MSC	RRM2
0	1.5196	0.7	0.012	0	Cycling Neural Prog/MSC	CDCA3
0	1.50972	0.728	0.015	0	Cycling Neural Prog/MSC	NUF2
0	1.50899	0.862	0.208	0	Cycling Neural Prog/MSC	TMSB15A
0	1.5053	0.769	0.091	0	Cycling Neural Prog/MSC	KIF20B
0	1.41769	0.672	0.04	0	Cycling Neural Prog/MSC	ECT2
0	1.4001	0.665	0.037	0	Cycling Neural Prog/MSC	SGO2
0	1.39862	0.723	0.028	0	Cycling Neural Prog/MSC	PRC1
0	1.3778	0.728	0.016	0	Cycling Neural Prog/MSC	SGO1
0	1.36875	0.831	0.132	0	Cycling Neural Prog/MSC	CENPW
0	1.36459	0.696	0.015	0	Cycling Neural Prog/MSC	KIF15
0	1.35606	0.727	0.012	0	Cycling Neural Prog/MSC	SPC25
0	1.35102	0.614	0.013	0	Cycling Neural Prog/MSC	HMMR
0	1.34826	0.649	0.032	0	Cycling Neural Prog/MSC	TK1
0	1.33983	0.731	0.103	0	Cycling Neural Prog/MSC	ATAD2
0	1.32265	0.751	0.043	0	Cycling Neural Prog/MSC	CENPU
0	1.3064	0.678	0.016	0	Cycling Neural Prog/MSC	KNL1
0	1.30457	0.749	0.027	0	Cycling Neural Prog/MSC	ZWINT
0	1.28978	0.724	0.016	0	Cycling Neural Prog/MSC	KIFC1
0	1.2806	0.654	0.012	0	Cycling Neural Prog/MSC	CCNA2
0	1.27853	0.71	0.026	0	Cycling Neural Prog/MSC	NDC80
0	1.26396	0.657	0.017	0	Cycling Neural Prog/MSC	KIF11
0	1.2585	0.769	0.05	0	Cycling Neural Prog/MSC	CENPK
0	1.23883	0.681	0.131	0	Cycling Neural Prog/MSC	HELLS
0	1.23233	0.769	0.169	0	Cycling Neural Prog/MSC	MIS18BP1
0	1.21867	0.804	0.169	0	Cycling Neural Prog/MSC	DTYMK
0	1.21032	0.664	0.061	0	Cycling Neural Prog/MSC	FBXO5
0	1.20942	0.72	0.183	0	Cycling Neural Prog/MSC	PCNA
0	1.19914	0.751	0.117	0	Cycling Neural Prog/MSC	KIF22
0	1.18758	0.646	0.02	0	Cycling Neural Prog/MSC	MXD3
0	1.181	0.655	0.019	0	Cycling Neural Prog/MSC	DIAPH3
0	1.17913	0.642	0.019	0	Cycling Neural Prog/MSC	NCAPG
0	1.17698	0.81	0.211	0	Cycling Neural Prog/MSC	CCDC34
0	1.17459	0.609	0.012	0	Cycling Neural Prog/MSC	PIMREG
0	1.16887	0.627	0.015	0	Cycling Neural Prog/MSC	KIF23
0	1.16702	0.521	0.007	0	Cycling Neural Prog/MSC	CENPA
0	1.16261	0.643	0.014	0	Cycling Neural Prog/MSC	AURKB
0	1.14386	0.69	0.095	0	Cycling Neural Prog/MSC	DHFR
0	1.14007	0.744	0.142	0	Cycling Neural Prog/MSC	GGH
0	1.13661	0.736	0.083	0	Cycling Neural Prog/MSC	LMNB1
0	1.12892	0.65	0.01	0	Cycling Neural Prog/MSC	CKAP2L
0	1.11868	0.727	0.126	0	Cycling Neural Prog/MSC	EZH2
0	1.11818	0.61	0.015	0	Cycling Neural Prog/MSC	ANLN
0	1.10269	0.743	0.175	0	Cycling Neural Prog/MSC	MZT1
0	1.09414	0.678	0.032	0	Cycling Neural Prog/MSC	RAD51AP1
0	1.09021	0.677	0.056	0	Cycling Neural Prog/MSC	ORC6
0	1.07481	0.587	0.009	0	Cycling Neural Prog/MSC	DEPDC1
0	1.06447	0.694	0.135	0	Cycling Neural Prog/MSC	RRM1
0	1.06217	0.584	0.038	0	Cycling Neural Prog/MSC	CLSPN
0	1.04902	0.666	0.025	0	Cycling Neural Prog/MSC	TACC3
0	1.04813	0.664	0.136	0	Cycling Neural Prog/MSC	MCM7
0	1.0379	0.668	0.041	0	Cycling Neural Prog/MSC	CENPM
0	1.03573	0.602	0.014	0	Cycling Neural Prog/MSC	ESCO2
0	1.03081	0.686	0.065	0	Cycling Neural Prog/MSC	CENPH
0	1.02243	0.677	0.148	0	Cycling Neural Prog/MSC	CKAP5
0	1.01792	0.555	0.039	0	Cycling Neural Prog/MSC	PSRC1
0	1.01573	0.63	0.029	0	Cycling Neural Prog/MSC	RACGAP1
0	1.00338	0.587	0.011	0	Cycling Neural Prog/MSC	KIF4A
8.66525e-298	1.06947	0.767	0.227	1.92629e-293	Cycling Neural Prog/MSC	USP1
9.24486e-294	3.94029	0.917	0.56	2.05513e-289	Cycling Neural Prog/MSC	HIST1H4C
9.91885e-281	1.10269	0.834	0.29	2.20496e-276	Cycling Neural Prog/MSC	SKA2
4.60578e-273	1.4762	0.899	0.405	1.02386e-268	Cycling Neural Prog/MSC	RAD21
9.91065e-270	1.09141	0.749	0.232	2.20314e-265	Cycling Neural Prog/MSC	TMEM106C
4.81313e-265	1.12101	0.886	0.369	1.06996e-260	Cycling Neural Prog/MSC	LSM4
2.90228e-261	1.10152	0.529	0.116	6.45176e-257	Cycling Neural Prog/MSC	HIST2H2AC
1.29923e-253	1.34562	0.938	0.567	2.8882e-249	Cycling Neural Prog/MSC	RANBP1
2.58194e-246	1.1239	0.822	0.315	5.73965e-242	Cycling Neural Prog/MSC	BUB3
3.81369e-230	1.14018	0.889	0.423	8.47782e-226	Cycling Neural Prog/MSC	CBX5
4.45807e-226	1.44848	0.65	0.202	9.9103e-222	Cycling Neural Prog/MSC	HIST1H1C
6.00173e-209	1.50141	0.969	0.65	1.33418e-204	Cycling Neural Prog/MSC	UBE2S
3.88513e-208	1.16345	0.899	0.488	8.63665e-204	Cycling Neural Prog/MSC	PSIP1
7.09176e-194	1.09093	0.811	0.33	1.5765e-189	Cycling Neural Prog/MSC	SYNE2
1.79223e-192	1.08728	0.731	0.282	3.98414e-188	Cycling Neural Prog/MSC	TUBB6
4.56334e-191	1.91444	0.92	0.58	1.01443e-186	Cycling Neural Prog/MSC	ARL6IP1
3.10791e-187	1.21739	0.917	0.522	6.90889e-183	Cycling Neural Prog/MSC	JPT1
8.35916e-182	1.05223	0.827	0.385	1.85824e-177	Cycling Neural Prog/MSC	SMC3
5.42139e-176	1.01683	0.932	0.574	1.20518e-171	Cycling Neural Prog/MSC	HNRNPR
3.76959e-171	1.02351	0.933	0.604	8.37979e-167	Cycling Neural Prog/MSC	HNRNPD
3.11755e-170	1.20536	0.899	0.552	6.93031e-166	Cycling Neural Prog/MSC	NASP
4.02644e-167	1.41	0.895	0.554	8.95078e-163	Cycling Neural Prog/MSC	DUT
8.54732e-139	1.57354	0.773	0.418	1.90007e-134	Cycling Neural Prog/MSC	TUBA1C
0	3.33705	0.602	0.082	0	Radial Glia	C1orf61
0	2.96379	0.743	0.096	0	Radial Glia	FABP7
0	2.95448	0.937	0.1	0	Radial Glia	SOX2
0	2.92731	0.858	0.114	0	Radial Glia	TTYH1
0	2.60565	0.953	0.384	0	Radial Glia	CKB
0	2.42048	0.821	0.076	0	Radial Glia	PTPRZ1
0	2.31432	0.888	0.303	0	Radial Glia	GPM6B
0	1.92847	0.663	0.127	0	Radial Glia	SLC1A3
0	1.83404	0.692	0.059	0	Radial Glia	LINC00461
0	1.77089	0.964	0.287	0	Radial Glia	TUBB2B
0	1.76642	0.798	0.145	0	Radial Glia	CDH2
0	1.63599	0.793	0.122	0	Radial Glia	FZD3
0	1.58375	0.645	0.091	0	Radial Glia	PSAT1
0	1.57826	0.777	0.22	0	Radial Glia	SRGAP3
0	1.57204	0.577	0.052	0	Radial Glia	ADGRV1
0	1.56933	0.581	0.107	0	Radial Glia	SOX9
0	1.40543	0.77	0.213	0	Radial Glia	MSI2
0	1.36968	0.712	0.114	0	Radial Glia	GPM6A
0	1.30654	0.793	0.141	0	Radial Glia	BEX1
0	1.29594	0.554	0.014	0	Radial Glia	RFX4
0	1.23463	0.458	0.033	0	Radial Glia	PAX6
0	1.22377	0.528	0.04	0	Radial Glia	POU3F2
0	1.13691	0.633	0.11	0	Radial Glia	CHD7
0	1.09131	0.618	0.125	0	Radial Glia	KIF21A
0	1.07514	0.685	0.141	0	Radial Glia	SYT11
0	1.04281	0.448	0.066	0	Radial Glia	PHYHIPL
0	1.01938	0.559	0.097	0	Radial Glia	DDR1
1.76728e-278	1.32966	0.411	0.064	3.92867e-274	Radial Glia	ZIC1
3.22976e-261	1.66082	0.899	0.449	7.17976e-257	Radial Glia	QKI
1.54308e-254	1.35879	0.7	0.218	3.43026e-250	Radial Glia	NES
1.51468e-230	1.37355	0.433	0.082	3.36713e-226	Radial Glia	HES6
8.10168e-230	1.12534	0.427	0.083	1.801e-225	Radial Glia	ATP1A2
8.72085e-230	1.11722	0.511	0.117	1.93864e-225	Radial Glia	MGST1
1.26137e-221	1.34445	0.685	0.228	2.80403e-217	Radial Glia	PON2
1.33007e-216	1.22295	0.925	0.554	2.95674e-212	Radial Glia	MAP1B
4.01084e-214	1.51408	0.483	0.114	8.91609e-210	Radial Glia	EDNRB
2.88317e-203	1.09381	0.668	0.215	6.4093e-199	Radial Glia	TMSB15A
2.53782e-192	1.02672	0.69	0.247	5.64158e-188	Radial Glia	FEZ1
1.48489e-187	1.03975	0.684	0.251	3.30091e-183	Radial Glia	KIF1B
2.90652e-179	1.09477	0.794	0.381	6.46119e-175	Radial Glia	GCSH
1.89181e-176	1.11931	0.84	0.47	4.2055e-172	Radial Glia	RTN3
3.72736e-172	1.0377	0.778	0.344	8.28592e-168	Radial Glia	ODC1
4.83305e-152	1.03666	0.456	0.133	1.07439e-147	Radial Glia	ATP1B2
2.54792e-133	1.31254	0.773	0.397	5.66403e-129	Radial Glia	NR2F1
2.95009e-115	1.8069	0.612	0.281	6.55805e-111	Radial Glia	BNIP3
1.64517e-106	1.02516	0.61	0.295	3.65721e-102	Radial Glia	PEA15
3.84332e-105	1.20322	0.664	0.349	8.5437e-101	Radial Glia	TFDP2
2.38257e-104	1.0253	0.535	0.224	5.29646e-100	Radial Glia	HMGA1
1.05503e-100	2.00258	0.657	0.338	2.34534e-96	Radial Glia	CLU
8.52334e-96	1.5126	0.805	0.489	1.89474e-91	Radial Glia	FABP5
1.00646e-94	1.04215	0.81	0.489	2.23735e-90	Radial Glia	TUBB2A
1.82621e-92	1.39682	0.716	0.397	4.05966e-88	Radial Glia	ID4
0	4.6833	0.883	0.079	0	immature neuron	STMN2
0	4.13213	0.977	0.253	0	immature neuron	TUBB2B
0	3.62717	0.81	0.078	0	immature neuron	GAP43
0	3.45881	0.862	0.25	0	immature neuron	SOX11
0	3.44205	0.795	0.05	0	immature neuron	RTN1
0	3.18091	0.904	0.248	0	immature neuron	MLLT11
0	3.11947	0.805	0.077	0	immature neuron	GPM6A
0	3.06814	0.922	0.536	0	immature neuron	MAP1B
0	3.06403	0.794	0.052	0	immature neuron	TAGLN3
0	2.99275	0.978	0.664	0	immature neuron	STMN1
0	2.78036	0.865	0.103	0	immature neuron	BEX1
0	2.73916	0.705	0.023	0	immature neuron	STMN4
0	2.70199	0.803	0.222	0	immature neuron	UCHL1
0	2.6789	0.857	0.194	0	immature neuron	CD24
0	2.65213	0.764	0.074	0	immature neuron	DCX
0	2.47892	0.919	0.503	0	immature neuron	JPT1
0	2.45684	0.746	0.101	0	immature neuron	MAP2
0	2.45063	0.716	0.059	0	immature neuron	KIF5C
0	2.36227	0.874	0.468	0	immature neuron	TUBB2A
0	2.32228	0.763	0.088	0	immature neuron	CRMP1
0	2.27882	0.663	0.104	0	immature neuron	SYT1
0	2.25022	0.878	0.483	0	immature neuron	BASP1
0	2.23639	0.68	0.022	0	immature neuron	ELAVL4
0	2.21262	0.712	0.037	0	immature neuron	ELAVL3
0	2.20877	0.717	0.03	0	immature neuron	SCG3
0	2.15212	0.624	0.022	0	immature neuron	GNG3
0	2.07473	0.565	0.008	0	immature neuron	NSG2
0	2.04884	0.705	0.087	0	immature neuron	PCSK1N
0	2.04274	0.776	0.184	0	immature neuron	TMSB15A
0	2.01472	0.655	0.098	0	immature neuron	CXADR
0	1.99071	0.636	0.078	0	immature neuron	NSG1
0	1.94716	0.636	0.071	0	immature neuron	NRXN1
0	1.9125	0.525	0.122	0	immature neuron	BCL11A
0	1.87866	0.616	0.078	0	immature neuron	APLP1
0	1.83242	0.661	0.17	0	immature neuron	NCAM1
0	1.82575	0.766	0.325	0	immature neuron	PAFAH1B3
0	1.82054	0.491	0.067	0	immature neuron	C1orf61
0	1.81267	0.535	0.009	0	immature neuron	INA
0	1.8033	0.686	0.155	0	immature neuron	BEX2
0	1.79091	0.49	0.02	0	immature neuron	GRIA2
0	1.75951	0.569	0.023	0	immature neuron	ELAVL2
0	1.74886	0.862	0.364	0	immature neuron	CKB
0	1.71743	0.583	0.077	0	immature neuron	PKIA
0	1.67982	0.503	0.045	0	immature neuron	LINC00461
0	1.66292	0.673	0.227	0	immature neuron	FEZ1
0	1.65165	0.743	0.402	0	immature neuron	DPYSL2
0	1.62605	0.518	0.098	0	immature neuron	ANK3
0	1.61098	0.636	0.113	0	immature neuron	PODXL2
0	1.60586	0.684	0.277	0	immature neuron	FNBP1L
0	1.59675	0.793	0.456	0	immature neuron	RTN3
0	1.57596	0.792	0.423	0	immature neuron	C4orf48
0	1.53491	0.672	0.333	0	immature neuron	KIDINS220
0	1.52705	0.616	0.207	0	immature neuron	SRGAP3
0	1.52052	0.668	0.313	0	immature neuron	CEP170
0	1.51262	0.49	0.045	0	immature neuron	MAPT
0	1.50957	0.499	0.044	0	immature neuron	MIAT
0	1.50434	0.562	0.038	0	immature neuron	GPC2
0	1.43476	0.657	0.294	0	immature neuron	DPYSL3
0	1.4225	0.599	0.182	0	immature neuron	MEX3A
0	1.42114	0.742	0.41	0	immature neuron	HDAC2
0	1.40088	0.581	0.138	0	immature neuron	CCDC112
0	1.39697	0.551	0.106	0	immature neuron	KIF21A
0	1.38225	0.518	0.052	0	immature neuron	TUBB3
0	1.37552	0.496	0.017	0	immature neuron	GDAP1L1
0	1.35714	0.655	0.276	0	immature neuron	GDI1
0	1.3448	0.525	0.107	0	immature neuron	ENO2
0	1.34442	0.563	0.142	0	immature neuron	C3orf14
0	1.32827	0.685	0.361	0	immature neuron	YWHAG
0	1.31432	0.634	0.237	0	immature neuron	RUFY3
0	1.28984	0.493	0.122	0	immature neuron	TCEAL2
0	1.28846	0.543	0.111	0	immature neuron	FZD3
0	1.2852	0.559	0.125	0	immature neuron	SYT11
0	1.27958	0.46	0.048	0	immature neuron	RAB3A
0	1.27893	0.55	0.174	0	immature neuron	ZNF462
0	1.26459	0.455	0.01	0	immature neuron	SRRM4
0	1.26336	0.508	0.16	0	immature neuron	SCG5
0	1.26212	0.606	0.214	0	immature neuron	OCIAD2
0	1.262	0.692	0.363	0	immature neuron	RPAIN
0	1.25085	0.47	0.106	0	immature neuron	SEZ6L2
0	1.22304	0.445	0.021	0	immature neuron	CDK5R1
0	1.22177	0.577	0.132	0	immature neuron	CDH2
0	1.21601	0.574	0.217	0	immature neuron	KLC1
0	1.19001	0.529	0.149	0	immature neuron	CD200
0	1.18754	0.543	0.172	0	immature neuron	KIF3A
0	1.18744	0.402	0.067	0	immature neuron	OLFM1
0	1.1833	0.414	0.019	0	immature neuron	AMER2
0	1.17873	0.433	0.016	0	immature neuron	KIF5A
0	1.17498	0.44	0.011	0	immature neuron	FAM57B
0	1.16719	0.484	0.101	0	immature neuron	ATAT1
0	1.16423	0.407	0.033	0	immature neuron	GNAO1
0	1.141	0.433	0.008	0	immature neuron	ATCAY
0	1.14002	0.465	0.043	0	immature neuron	SYP
0	1.1391	0.493	0.125	0	immature neuron	CLASP2
0	1.13209	0.574	0.196	0	immature neuron	DTD1
0	1.12824	0.478	0.105	0	immature neuron	ATP6V0E2
0	1.10561	0.495	0.096	0	immature neuron	MYEF2
0	1.10239	0.419	0.057	0	immature neuron	MAP6
0	1.08623	0.57	0.224	0	immature neuron	SMARCA4
0	1.0806	0.408	0.025	0	immature neuron	2022-09-03
0	1.07979	0.545	0.192	0	immature neuron	TSPAN13
0	1.05992	0.45	0.106	0	immature neuron	WASF1
0	1.04053	0.542	0.195	0	immature neuron	SLC25A4
0	1.03948	0.415	0.032	0	immature neuron	SBK1
0	1.03395	0.53	0.163	0	immature neuron	KLHL23
0	1.00884	0.457	0.138	0	immature neuron	PGM2L1
0	1.00258	0.433	0.05	0	immature neuron	KIF1A
0	1.0021	0.436	0.101	0	immature neuron	CHD7
0	1.00101	0.404	0.046	0	immature neuron	TMEM35A
9.8347e-308	1.30355	0.47	0.152	2.18625e-303	immature neuron	PCBP4
8.9946e-279	1.47217	0.608	0.275	1.9995e-274	immature neuron	NOVA1
1.73771e-273	1.11235	0.61	0.294	3.86294e-269	immature neuron	DBN1
1.90419e-272	1.2287	0.479	0.163	4.23301e-268	immature neuron	CADM1
2.57698e-265	1.03556	0.542	0.228	5.72863e-261	immature neuron	KDM1A
1.65673e-240	1.02757	0.596	0.291	3.68292e-236	immature neuron	NCBP2
0	4.25597	0.83	0.043	0	endothelial	VWF
0	3.88843	0.849	0.063	0	endothelial	CLDN5
0	3.51039	0.789	0.121	0	endothelial	IFI27
0	3.27164	0.925	0.37	0	endothelial	GNG11
0	3.2155	0.825	0.119	0	endothelial	TM4SF1
0	3.19687	0.809	0.05	0	endothelial	PECAM1
0	3.14056	0.855	0.285	0	endothelial	HSPG2
0	3.03258	0.906	0.27	0	endothelial	CAV1
0	2.99053	0.452	0.021	0	endothelial	C2CD4B
0	2.78877	0.831	0.124	0	endothelial	CD34
0	2.77003	0.78	0.051	0	endothelial	CLEC14A
0	2.76235	0.847	0.255	0	endothelial	A2M
0	2.74429	0.853	0.358	0	endothelial	RAMP2
0	2.66814	0.709	0.039	0	endothelial	SOX18
0	2.61745	0.82	0.135	0	endothelial	EGFL7
0	2.5808	0.474	0.037	0	endothelial	RBP7
0	2.57902	0.768	0.023	0	endothelial	CDH5
0	2.54171	0.798	0.064	0	endothelial	ESAM
0	2.49678	0.716	0.049	0	endothelial	CD93
0	2.49487	0.775	0.025	0	endothelial	ECSCR
0	2.48427	0.75	0.016	0	endothelial	ADGRL4
0	2.41819	0.871	0.506	0	endothelial	SPARCL1
0	2.31349	0.744	0.164	0	endothelial	ENG
0	2.30766	0.753	0.017	0	endothelial	CXorf36
0	2.29004	0.938	0.592	0	endothelial	IGFBP7
0	2.2545	0.478	0.013	0	endothelial	PLVAP
0	2.23638	0.687	0.02	0	endothelial	TM4SF18
0	2.20577	0.701	0.074	0	endothelial	ITGA6
0	2.16296	0.704	0.059	0	endothelial	ICAM2
0	2.14398	0.709	0.064	0	endothelial	PALMD
0	2.12182	0.805	0.305	0	endothelial	CRIP2
0	2.09516	0.704	0.096	0	endothelial	EMCN
0	2.06973	0.699	0.015	0	endothelial	ROBO4
0	2.06901	0.764	0.22	0	endothelial	MGST2
0	2.06734	0.495	0.02	0	endothelial	APLNR
0	2.0438	0.763	0.167	0	endothelial	BCAM
0	2.00649	0.691	0.14	0	endothelial	PLXND1
0	1.98175	0.847	0.527	0	endothelial	CCDC85B
0	1.97339	0.662	0.062	0	endothelial	ADGRF5
0	1.96004	0.511	0.007	0	endothelial	GPIHBP1
0	1.95439	0.655	0.162	0	endothelial	MCAM
0	1.92789	0.622	0.063	0	endothelial	CAVIN2
0	1.92446	0.562	0.036	0	endothelial	NOTCH4
0	1.92433	0.724	0.217	0	endothelial	TGFBR2
0	1.92068	0.676	0.098	0	endothelial	TNFSF10
0	1.91079	0.925	0.543	0	endothelial	HLA-B
0	1.90541	0.564	0.1	0	endothelial	LXN
0	1.90473	0.655	0.018	0	endothelial	TIE1
0	1.88983	0.731	0.196	0	endothelial	IL32
0	1.88438	0.492	0.063	0	endothelial	AQP1
0	1.8338	0.814	0.119	0	endothelial	RNASE1
0	1.79834	0.586	0.022	0	endothelial	KDR
0	1.79722	0.677	0.112	0	endothelial	FAM198B
0	1.79139	0.705	0.209	0	endothelial	ARHGAP29
0	1.77998	0.61	0.01	0	endothelial	MMRN2
0	1.77899	0.626	0.121	0	endothelial	CALCRL
0	1.72864	0.58	0.021	0	endothelial	FLT1
0	1.65804	0.435	0.033	0	endothelial	TNFRSF4
0	1.64764	0.624	0.114	0	endothelial	ADAM15
0	1.64762	0.612	0.05	0	endothelial	GIMAP7
0	1.64754	0.613	0.063	0	endothelial	LMO2
0	1.64032	0.532	0.033	0	endothelial	PODXL
0	1.627	0.681	0.161	0	endothelial	ELK3
0	1.62155	0.64	0.11	0	endothelial	EPAS1
0	1.56689	0.613	0.088	0	endothelial	EHD4
0	1.55524	0.537	0.009	0	endothelial	PTPRB
0	1.50986	0.503	0.065	0	endothelial	TMEM88
0	1.49866	0.594	0.154	0	endothelial	CRIM1
0	1.45999	0.584	0.012	0	endothelial	MYCT1
0	1.45145	0.555	0.022	0	endothelial	SHANK3
0	1.44268	0.473	0.011	0	endothelial	PCDH12
0	1.44169	0.666	0.167	0	endothelial	CAV2
0	1.43699	0.541	0.128	0	endothelial	VWA1
0	1.4269	0.486	0.063	0	endothelial	FILIP1
0	1.42192	0.576	0.075	0	endothelial	CYYR1
0	1.36558	0.422	0.009	0	endothelial	DLL4
0	1.34977	0.539	0.066	0	endothelial	PTPRM
0	1.3384	0.565	0.135	0	endothelial	LPAR6
0	1.32735	0.553	0.089	0	endothelial	EFNA1
0	1.31744	0.511	0.036	0	endothelial	RAPGEF5
0	1.31459	0.495	0.015	0	endothelial	AFAP1L1
0	1.30504	0.504	0.014	0	endothelial	IL3RA
0	1.28778	0.404	0.01	0	endothelial	ACE
0	1.28072	0.519	0.101	0	endothelial	RFLNB
0	1.27973	0.545	0.135	0	endothelial	SMAD1
0	1.27728	0.414	0.009	0	endothelial	SOX7
0	1.27545	0.514	0.022	0	endothelial	KANK3
0	1.26953	0.502	0.071	0	endothelial	PREX2
0	1.26918	0.42	0.021	0	endothelial	NOSTRIN
0	1.267	0.569	0.057	0	endothelial	GIMAP4
0	1.25099	0.52	0.062	0	endothelial	DOCK9
0	1.23796	0.555	0.121	0	endothelial	DUSP6
0	1.21873	0.427	0.05	0	endothelial	MECOM
0	1.19839	0.537	0.115	0	endothelial	ITGA5
0	1.18633	0.466	0.076	0	endothelial	JCAD
0	1.17609	0.487	0.029	0	endothelial	ADCY4
0	1.15124	0.42	0.064	0	endothelial	VASH1
0	1.13231	0.449	0.019	0	endothelial	DYSF
0	1.10987	0.481	0.023	0	endothelial	ERG
0	1.10973	0.449	0.049	0	endothelial	TNFAIP8L1
0	1.10069	0.492	0.085	0	endothelial	FAM241A
0	1.09402	0.432	0.059	0	endothelial	ENTPD1
0	1.08638	0.466	0.02	0	endothelial	RASIP1
0	1.08391	0.446	0.053	0	endothelial	PDGFB
0	1.08202	0.495	0.047	0	endothelial	STAB1
0	1.06408	0.438	0.064	0	endothelial	SNCG
0	1.05031	0.479	0.096	0	endothelial	FAM69B
0	1.04709	0.492	0.097	0	endothelial	CARD8
0	1.04139	0.474	0.032	0	endothelial	GIMAP1
0	1.03614	0.435	0.069	0	endothelial	FZD4
0	1.00058	0.445	0.058	0	endothelial	TSPAN15
3.67171e-306	1.58336	0.665	0.224	8.16222e-302	endothelial	SEC14L1
1.4359e-300	1.65564	0.745	0.313	3.192e-296	endothelial	S100A16
4.26537e-287	1.90521	0.612	0.182	9.48191e-283	endothelial	COL15A1
6.39653e-287	1.53701	0.592	0.17	1.42195e-282	endothelial	ARHGAP18
4.08853e-285	1.16217	0.53	0.13	9.0888e-281	endothelial	ECE1
1.03811e-256	1.31079	0.564	0.166	2.30772e-252	endothelial	FLNB
2.11059e-255	1.11105	0.629	0.181	4.69185e-251	endothelial	GMFG
2.23293e-253	1.45496	0.543	0.154	4.96379e-249	endothelial	RGS3
3.93592e-248	2.18275	0.601	0.21	8.74955e-244	endothelial	EFCAB14
1.49013e-247	1.38613	0.445	0.1	3.31256e-243	endothelial	ANGPT2
7.89138e-247	1.69086	0.659	0.265	1.75425e-242	endothelial	HYAL2
4.84519e-241	2.28024	0.824	0.464	1.07709e-236	endothelial	COL4A1
7.62751e-237	1.15095	0.401	0.086	1.6956e-232	endothelial	NUAK1
5.00061e-234	1.13313	0.577	0.177	1.11163e-229	endothelial	ETS1
1.01125e-233	1.5832	0.52	0.153	2.24801e-229	endothelial	MYO10
4.2412e-230	1.00656	0.481	0.126	9.42819e-226	endothelial	TSPAN18
2.08131e-228	1.47951	0.725	0.329	4.62675e-224	endothelial	MYH9
3.64776e-224	1.07305	0.518	0.149	8.10897e-220	endothelial	ABLIM1
5.81149e-222	1.50791	0.777	0.428	1.29189e-217	endothelial	CAVIN1
1.80714e-215	1.03959	0.456	0.119	4.01728e-211	endothelial	FAM129A
6.99792e-215	2.15334	0.446	0.12	1.55564e-210	endothelial	LY6H
5.75113e-214	1.11835	0.596	0.213	1.27848e-209	endothelial	MTUS1
2.61259e-210	1.04576	0.476	0.132	5.80778e-206	endothelial	MAST4
2.6805e-209	1.04435	0.405	0.093	5.95874e-205	endothelial	THSD7A
1.83122e-207	1.2112	0.607	0.228	4.07081e-203	endothelial	PON2
8.08343e-203	1.44956	0.608	0.23	1.79695e-198	endothelial	SLC9A3R2
1.43649e-196	1.47363	0.682	0.313	3.19331e-192	endothelial	NRP1
2.4627e-194	1.01222	0.431	0.114	5.47458e-190	endothelial	HEG1
3.52065e-194	1.19812	0.53	0.175	7.8264e-190	endothelial	FAM43A
3.38558e-192	1.30269	0.751	0.404	7.52613e-188	endothelial	NPDC1
1.57026e-188	1.01869	0.472	0.139	3.49069e-184	endothelial	MAGI1
3.04599e-177	1.50985	0.669	0.313	6.77123e-173	endothelial	UACA
4.90955e-177	1.53501	0.519	0.196	1.09139e-172	endothelial	VAMP5
2.34469e-171	1.36605	0.739	0.406	5.21225e-167	endothelial	LAMA4
4.30492e-170	1.00038	0.485	0.161	9.56983e-166	endothelial	SSFA2
1.69227e-168	1.0917	0.563	0.218	3.76191e-164	endothelial	LDB2
1.15112e-167	1.26168	0.723	0.414	2.55894e-163	endothelial	ACTN4
8.61835e-166	1.30047	0.489	0.171	1.91586e-161	endothelial	MGLL
1.02449e-161	1.28246	0.612	0.27	2.27744e-157	endothelial	UTRN
1.76228e-154	1.19993	0.633	0.304	3.91756e-150	endothelial	LAMC1
3.9698e-154	1.78092	0.529	0.22	8.82487e-150	endothelial	INSR
1.6387e-149	1.23631	0.659	0.355	3.64282e-145	endothelial	SH3BP5
3.37238e-149	1.07909	0.678	0.362	7.4968e-145	endothelial	MSN
1.51051e-139	1.06589	0.45	0.15	3.35786e-135	endothelial	TCIM
6.29784e-121	1.0546	0.601	0.284	1.40001e-116	endothelial	COL18A1
0	6.85351	0.852	0.031	0	Lymphatics endothelial cells	CCL21
0	3.99672	0.897	0.019	0	Lymphatics endothelial cells	MMRN1
0	3.74805	0.955	0.09	0	Lymphatics endothelial cells	TFF3
0	3.18841	0.946	0.088	0	Lymphatics endothelial cells	CLDN5
0	2.97494	0.843	0.079	0	Lymphatics endothelial cells	CAVIN2
0	2.91995	0.83	0.043	0	Lymphatics endothelial cells	PROX1
0	2.77856	0.848	0.049	0	Lymphatics endothelial cells	ECSCR
0	2.69366	0.592	0.021	0	Lymphatics endothelial cells	LYVE1
0	2.1646	0.803	0.037	0	Lymphatics endothelial cells	TIE1
0	2.15344	0.771	0.041	0	Lymphatics endothelial cells	CXorf36
0	2.11989	0.839	0.075	0	Lymphatics endothelial cells	PECAM1
0	2.07921	0.709	0.052	0	Lymphatics endothelial cells	RELN
0	2.00817	0.677	0.002	0	Lymphatics endothelial cells	STAB2
0	1.98421	0.762	0.016	0	Lymphatics endothelial cells	TBX1
0	1.96912	0.704	0.016	0	Lymphatics endothelial cells	FLT4
0	1.9255	0.659	0.042	0	Lymphatics endothelial cells	TM4SF18
0	1.82983	0.704	0.039	0	Lymphatics endothelial cells	KDR
0	1.82122	0.704	0.033	0	Lymphatics endothelial cells	MRC1
0	1.75847	0.686	0.03	0	Lymphatics endothelial cells	MYCT1
0	1.73111	0.749	0.072	0	Lymphatics endothelial cells	GIMAP4
0	1.66023	0.722	0.047	0	Lymphatics endothelial cells	CDH5
0	1.49925	0.641	0.037	0	Lymphatics endothelial cells	KANK3
0	1.30536	0.565	0.03	0	Lymphatics endothelial cells	TMEM255B
0	1.2291	0.543	0.028	0	Lymphatics endothelial cells	SCN3B
0	1.16646	0.529	0.021	0	Lymphatics endothelial cells	PCAT19
0	1.10433	0.475	0.028	0	Lymphatics endothelial cells	GPR146
0	1.03462	0.466	0.022	0	Lymphatics endothelial cells	GIMAP8
0	1.02619	0.516	0.031	0	Lymphatics endothelial cells	AFAP1L1
1.11624e-296	1.35065	0.547	0.039	2.48139e-292	Lymphatics endothelial cells	ROBO4
2.24039e-293	1.87133	0.744	0.08	4.98038e-289	Lymphatics endothelial cells	LMO2
2.78665e-287	1.20842	0.565	0.044	6.19473e-283	Lymphatics endothelial cells	ADCY4
3.28413e-266	1.13789	0.538	0.043	7.30061e-262	Lymphatics endothelial cells	RASGRP3
2.07495e-254	2.65859	0.906	0.157	4.61261e-250	Lymphatics endothelial cells	EGFL7
1.74528e-248	1.25142	0.52	0.043	3.87975e-244	Lymphatics endothelial cells	RASSF9
5.33401e-247	1.64003	0.655	0.067	1.18575e-242	Lymphatics endothelial cells	GIMAP7
1.60738e-243	3.03581	0.825	0.133	3.5732e-239	Lymphatics endothelial cells	PTX3
6.26552e-235	1.6775	0.61	0.062	1.39282e-230	Lymphatics endothelial cells	SOX18
1.43057e-231	4.51291	0.978	0.249	3.18015e-227	Lymphatics endothelial cells	TFPI
1.36971e-214	1.07454	0.507	0.046	3.04487e-210	Lymphatics endothelial cells	GIMAP1
1.29444e-201	1.14274	0.57	0.061	2.87754e-197	Lymphatics endothelial cells	STAB1
2.09153e-198	2.07004	0.825	0.142	4.64948e-194	Lymphatics endothelial cells	TM4SF1
3.05134e-188	2.92728	0.691	0.109	6.78314e-184	Lymphatics endothelial cells	ANGPT2
7.1383e-187	1.28679	0.596	0.077	1.58685e-182	Lymphatics endothelial cells	WFS1
1.43805e-186	2.02647	0.758	0.14	3.19678e-182	Lymphatics endothelial cells	PDPN
8.46559e-186	1.84942	0.722	0.117	1.8819e-181	Lymphatics endothelial cells	TNFSF10
6.99565e-180	1.6677	0.762	0.136	1.55513e-175	Lymphatics endothelial cells	CALCRL
1.95366e-178	1.71012	0.408	0.036	4.34298e-174	Lymphatics endothelial cells	C2CD4B
4.48093e-174	2.56028	0.561	0.072	9.96112e-170	Lymphatics endothelial cells	VWF
4.4423e-170	3.29849	0.996	0.387	9.87523e-166	Lymphatics endothelial cells	GNG11
1.82914e-165	1.973	0.798	0.177	4.06617e-161	Lymphatics endothelial cells	ELK3
4.45301e-162	2.45997	0.883	0.26	9.89904e-158	Lymphatics endothelial cells	PPFIBP1
5.49692e-162	2.04678	0.874	0.237	1.22197e-157	Lymphatics endothelial cells	MGST2
2.37032e-160	1.35307	0.565	0.079	5.26922e-156	Lymphatics endothelial cells	PIEZO2
8.00598e-159	1.5033	0.785	0.137	1.77973e-154	Lymphatics endothelial cells	LAPTM5
2.26813e-158	1.09543	0.583	0.081	5.04206e-154	Lymphatics endothelial cells	DSP
7.34868e-158	1.18333	0.498	0.062	1.63361e-153	Lymphatics endothelial cells	DOCK5
2.15945e-153	3.86619	0.664	0.122	4.80047e-149	Lymphatics endothelial cells	FABP4
1.15812e-151	1.12419	0.534	0.074	2.5745e-147	Lymphatics endothelial cells	PGM5
1.17276e-150	2.97648	0.955	0.373	2.60704e-146	Lymphatics endothelial cells	RAMP2
2.5539e-149	1.19558	0.561	0.083	5.67732e-145	Lymphatics endothelial cells	RALGAPA2
6.00195e-149	1.03265	0.475	0.059	1.33423e-144	Lymphatics endothelial cells	RPS6KA2
2.77466e-147	1.54923	0.677	0.13	6.16807e-143	Lymphatics endothelial cells	JUP
9.35933e-143	1.13908	0.525	0.075	2.08058e-138	Lymphatics endothelial cells	SEMA3A
1.07476e-142	1.04686	0.534	0.077	2.3892e-138	Lymphatics endothelial cells	PIEZO1
1.84987e-138	1.86237	0.516	0.075	4.11227e-134	Lymphatics endothelial cells	SNCG
3.75926e-138	1.35701	0.655	0.118	8.35683e-134	Lymphatics endothelial cells	PTPRE
2.40941e-137	1.82145	0.834	0.233	5.35612e-133	Lymphatics endothelial cells	TGFBR2
1.23005e-136	1.56492	0.691	0.136	2.73439e-132	Lymphatics endothelial cells	NNMT
6.27206e-136	1.05211	0.448	0.057	1.39428e-131	Lymphatics endothelial cells	ZDHHC14
4.41783e-129	2.44619	0.897	0.314	9.82084e-125	Lymphatics endothelial cells	NRP2
3.84101e-128	1.58331	0.673	0.147	8.53856e-124	Lymphatics endothelial cells	SMAD1
4.34543e-127	1.59791	0.798	0.194	9.65988e-123	Lymphatics endothelial cells	GMFG
3.02582e-124	1.14391	0.637	0.128	6.72639e-120	Lymphatics endothelial cells	RHOJ
1.04934e-121	1.5123	0.735	0.189	2.33268e-117	Lymphatics endothelial cells	TSPAN5
1.7105e-117	2.23771	0.852	0.306	3.80244e-113	Lymphatics endothelial cells	ARL4A
1.40478e-116	1.63723	0.785	0.224	3.12283e-112	Lymphatics endothelial cells	ARHGAP29
2.01896e-116	1.58903	0.731	0.183	4.48815e-112	Lymphatics endothelial cells	ENG
6.29548e-113	1.20507	0.664	0.146	1.39949e-108	Lymphatics endothelial cells	SULF2
2.88155e-112	3.02715	0.942	0.495	6.40567e-108	Lymphatics endothelial cells	FABP5
2.43532e-109	1.48126	0.767	0.23	5.41372e-105	Lymphatics endothelial cells	SHC1
3.5041e-109	1.95283	0.839	0.326	7.78961e-105	Lymphatics endothelial cells	S100A16
2.79146e-105	1.63437	0.735	0.2	6.20542e-101	Lymphatics endothelial cells	GJA1
2.2279e-102	2.0348	1	0.603	4.95263e-98	Lymphatics endothelial cells	IGFBP7
3.78604e-101	1.4828	0.704	0.2	8.41636e-97	Lymphatics endothelial cells	HOMER3
5.35061e-101	1.77477	0.803	0.28	1.18944e-96	Lymphatics endothelial cells	UTRN
4.93831e-100	1.67435	0.852	0.359	1.09779e-95	Lymphatics endothelial cells	FAM213A
1.50466e-98	1.19067	0.637	0.159	3.34485e-94	Lymphatics endothelial cells	MAN1A1
3.38622e-94	1.8723	0.753	0.277	7.52756e-90	Lymphatics endothelial cells	HYAL2
8.05702e-93	1.62038	0.892	0.458	1.79108e-88	Lymphatics endothelial cells	RAB11A
9.3204e-93	1.94359	0.946	0.593	2.07192e-88	Lymphatics endothelial cells	APP
2.4425e-92	1.02654	0.502	0.103	5.42967e-88	Lymphatics endothelial cells	VPS35L
6.3103e-91	1.32361	0.673	0.188	1.40278e-86	Lymphatics endothelial cells	SELENON
6.57751e-91	1.24885	0.578	0.135	1.46218e-86	Lymphatics endothelial cells	DUSP6
9.19045e-90	1.19185	0.641	0.166	2.04304e-85	Lymphatics endothelial cells	PROCR
1.39125e-87	1.79094	0.87	0.394	3.09276e-83	Lymphatics endothelial cells	RBP1
7.70666e-83	1.67445	0.857	0.458	1.71319e-78	Lymphatics endothelial cells	CD151
1.16724e-82	1.66487	0.861	0.47	2.59479e-78	Lymphatics endothelial cells	LIMS1
3.85307e-82	1.63839	0.865	0.466	8.56538e-78	Lymphatics endothelial cells	GYPC
2.87415e-80	1.48919	0.87	0.415	6.38923e-76	Lymphatics endothelial cells	LAMA4
1.85802e-78	1.33804	0.812	0.321	4.13038e-74	Lymphatics endothelial cells	CRIP2
1.05116e-75	1.06398	0.48	0.106	2.33672e-71	Lymphatics endothelial cells	OLFML2A
2.11049e-75	1.45995	0.96	0.658	4.69162e-71	Lymphatics endothelial cells	HLA-E
1.47642e-74	1.58314	0.91	0.466	3.28209e-70	Lymphatics endothelial cells	TIMP3
5.16343e-73	1.5876	0.897	0.534	1.14783e-68	Lymphatics endothelial cells	SPTBN1
5.88228e-71	1.36356	0.52	0.135	1.30763e-66	Lymphatics endothelial cells	SLC27A3
1.14561e-69	1.40764	0.552	0.15	2.5467e-65	Lymphatics endothelial cells	CD34
2.63864e-69	1.49139	0.435	0.096	5.8657e-65	Lymphatics endothelial cells	ADM
3.36486e-68	1.24314	0.664	0.221	7.48009e-64	Lymphatics endothelial cells	FLRT2
1.46266e-67	1.59921	0.821	0.44	3.25149e-63	Lymphatics endothelial cells	IL6ST
5.19789e-64	1.04992	0.529	0.139	1.15549e-59	Lymphatics endothelial cells	CYTL1
5.36896e-61	1.53264	0.52	0.148	1.19352e-56	Lymphatics endothelial cells	ALDH1A1
7.01285e-61	1.10312	0.65	0.229	1.55896e-56	Lymphatics endothelial cells	LDB2
2.9922e-60	1.35801	0.767	0.405	6.65166e-56	Lymphatics endothelial cells	REXO2
2.14929e-59	1.26085	0.722	0.332	4.77787e-55	Lymphatics endothelial cells	PRCP
6.60259e-58	1.54203	0.825	0.507	1.46776e-53	Lymphatics endothelial cells	CD59
8.92491e-58	1.20677	0.848	0.517	1.98401e-53	Lymphatics endothelial cells	GRN
9.31117e-55	1.00241	0.682	0.263	2.06987e-50	Lymphatics endothelial cells	MAF
4.50933e-54	1.10298	0.758	0.383	1.00242e-49	Lymphatics endothelial cells	TSPAN4
5.28768e-53	1.54553	0.749	0.345	1.17545e-48	Lymphatics endothelial cells	CLU
8.11024e-53	1.1292	0.641	0.263	1.80291e-48	Lymphatics endothelial cells	NTAN1
1.58367e-51	1.00541	0.637	0.261	3.52049e-47	Lymphatics endothelial cells	TRIOBP
1.79766e-50	1.05658	0.735	0.378	3.99619e-46	Lymphatics endothelial cells	FDPS
4.12041e-50	1.35564	0.628	0.253	9.15966e-46	Lymphatics endothelial cells	PLSCR4
1.93159e-49	2.24373	0.52	0.186	4.29393e-45	Lymphatics endothelial cells	EFEMP1
1.45388e-48	1.0363	0.704	0.344	3.23197e-44	Lymphatics endothelial cells	BCAP29
1.48607e-48	1.17568	0.74	0.383	3.30353e-44	Lymphatics endothelial cells	TMEM123
3.0884e-48	1.31657	0.794	0.494	6.86551e-44	Lymphatics endothelial cells	CYB5R3
3.61421e-48	1.17541	0.794	0.475	8.03439e-44	Lymphatics endothelial cells	CTSD
4.10751e-47	1.01192	0.713	0.339	9.13099e-43	Lymphatics endothelial cells	ACTN1
5.96072e-46	1.09574	0.57	0.219	1.32507e-41	Lymphatics endothelial cells	BACE2
3.65692e-45	1.29884	0.722	0.34	8.12934e-41	Lymphatics endothelial cells	CD9
2.37785e-41	1.08023	0.628	0.283	5.28596e-37	Lymphatics endothelial cells	NFAT5
1.03335e-40	1.16224	0.529	0.207	2.29715e-36	Lymphatics endothelial cells	VAMP5
1.44082e-39	1.05126	0.686	0.346	3.20294e-35	Lymphatics endothelial cells	NID1
1.42952e-38	1.04274	0.614	0.293	3.17782e-34	Lymphatics endothelial cells	GALNT1
1.09155e-37	1.04268	0.538	0.209	2.42652e-33	Lymphatics endothelial cells	PDLIM1
7.74918e-35	1.5118	0.704	0.398	1.72264e-30	Lymphatics endothelial cells	AKAP12
8.88209e-31	1.0004	0.614	0.308	1.97449e-26	Lymphatics endothelial cells	PIM3
0	5.82968	0.781	0.079	0	Myeloid	IL1B
0	5.69938	0.945	0.15	0	Myeloid	HLA-DRA
0	5.66423	0.791	0.098	0	Myeloid	CCL3
0	5.65259	0.74	0.137	0	Myeloid	CCL4L2
0	5.375	0.724	0.068	0	Myeloid	CCL3L1
0	5.29319	0.919	0.167	0	Myeloid	HLA-DRB1
0	5.19634	0.951	0.266	0	Myeloid	CD74
0	5.06337	0.921	0.115	0	Myeloid	HLA-DPA1
0	4.69263	0.748	0.161	0	Myeloid	CCL4
0	4.63813	0.896	0.209	0	Myeloid	HLA-DPB1
0	4.35803	0.75	0.09	0	Myeloid	CXCL8
0	4.30737	0.722	0.035	0	Myeloid	C1QA
0	4.21517	0.956	0.051	0	Myeloid	TYROBP
0	4.20563	0.712	0.042	0	Myeloid	HLA-DQA1
0	4.10649	0.784	0.061	0	Myeloid	HLA-DQB1
0	4.09587	0.837	0.187	0	Myeloid	PLAUR
0	3.97688	0.653	0.026	0	Myeloid	C1QB
0	3.79565	0.902	0.034	0	Myeloid	FCER1G
0	3.75632	0.942	0.11	0	Myeloid	AIF1
0	3.72359	0.765	0.04	0	Myeloid	BCL2A1
0	3.70405	0.661	0.019	0	Myeloid	C1QC
0	3.57358	0.451	0.123	0	Myeloid	RNASE1
0	3.56426	0.912	0.16	0	Myeloid	SRGN
0	3.54159	0.772	0.067	0	Myeloid	GPR183
0	3.52818	0.831	0.115	0	Myeloid	CD83
0	3.3569	0.5	0.119	0	Myeloid	G0S2
0	3.35673	0.495	0.095	0	Myeloid	CXCL3
0	3.28294	0.684	0.025	0	Myeloid	CD14
0	3.2266	0.781	0.012	0	Myeloid	MS4A7
0	3.10547	0.721	0.052	0	Myeloid	LYZ
0	3.07811	0.645	0.192	0	Myeloid	CXCL2
0	3.04359	0.805	0.051	0	Myeloid	HLA-DMA
0	3.01495	0.528	0.029	0	Myeloid	TNF
0	2.91359	0.797	0.308	0	Myeloid	SOD2
0	2.89962	0.735	0.01	0	Myeloid	MS4A6A
0	2.81709	0.752	0.025	0	Myeloid	PLEK
0	2.78556	0.821	0.434	0	Myeloid	CTSB
0	2.74352	0.861	0.416	0	Myeloid	IER3
0	2.66323	0.79	0.059	0	Myeloid	CD68
0	2.60589	0.807	0.103	0	Myeloid	CTSS
0	2.52536	0.509	0.036	0	Myeloid	C15orf48
0	2.4577	0.68	0.224	0	Myeloid	SGK1
0	2.42917	0.641	0.054	0	Myeloid	RGS1
0	2.39222	0.563	0.007	0	Myeloid	OLR1
0	2.35835	0.832	0.087	0	Myeloid	LAPTM5
0	2.33759	0.622	0.014	0	Myeloid	C5AR1
0	2.27585	0.7	0.023	0	Myeloid	FCGR2A
0	2.26647	0.462	0.008	0	Myeloid	FOLR2
0	2.2637	0.82	0.386	0	Myeloid	CTSZ
0	2.25625	0.716	0.189	0	Myeloid	TNFAIP3
0	2.20635	0.686	0.034	0	Myeloid	LST1
0	2.20454	0.439	0.016	0	Myeloid	IL1RN
0	2.14426	0.664	0.117	0	Myeloid	ICAM1
0	2.13253	0.801	0.278	0	Myeloid	RNASET2
0	2.09461	0.705	0.02	0	Myeloid	C1orf162
0	2.05732	0.488	0.049	0	Myeloid	HMOX1
0	2.05693	0.782	0.385	0	Myeloid	NAMPT
0	2.03541	0.909	0.607	0	Myeloid	NPC2
0	2.01277	0.738	0.158	0	Myeloid	DUSP2
0	2.00993	0.542	0.007	0	Myeloid	NLRP3
0	2.00355	0.438	0.028	0	Myeloid	F13A1
0	1.9877	0.724	0.161	0	Myeloid	TYMP
0	1.97082	0.648	0.163	0	Myeloid	NR4A3
0	1.96726	0.493	0.096	0	Myeloid	PTGS2
0	1.9429	0.711	0.242	0	Myeloid	NINJ1
0	1.93112	0.706	0.017	0	Myeloid	SPI1
0	1.91478	0.665	0.02	0	Myeloid	HLA-DMB
0	1.89185	0.552	0.016	0	Myeloid	FCGR3A
0	1.884	0.626	0.064	0	Myeloid	CPVL
0	1.86881	0.61	0.006	0	Myeloid	CYBB
0	1.86762	0.754	0.349	0	Myeloid	REL
0	1.8406	0.726	0.334	0	Myeloid	KDM6B
0	1.83033	0.431	0.005	0	Myeloid	TREM2
0	1.82822	0.582	0.009	0	Myeloid	IGSF6
0	1.80981	0.536	0.078	0	Myeloid	OTUD1
0	1.79177	0.526	0.006	0	Myeloid	MS4A4A
0	1.79019	0.767	0.135	0	Myeloid	VAMP8
0	1.78618	0.78	0.298	0	Myeloid	RGS10
0	1.78285	0.695	0.048	0	Myeloid	ITGB2
0	1.73355	0.6	0.1	0	Myeloid	SERPINB9
0	1.73345	0.666	0.118	0	Myeloid	RASGEF1B
0	1.71522	0.702	0.268	0	Myeloid	CFLAR
0	1.71236	0.562	0.05	0	Myeloid	ALOX5AP
0	1.70631	0.735	0.277	0	Myeloid	COTL1
0	1.68931	0.419	0.059	0	Myeloid	PLAU
0	1.66854	0.524	0.005	0	Myeloid	MSR1
0	1.65625	0.584	0.086	0	Myeloid	PHACTR1
0	1.63182	0.652	0.09	0	Myeloid	CXCL16
0	1.62696	0.562	0.214	0	Myeloid	INSIG1
0	1.60365	0.549	0.008	0	Myeloid	MNDA
0	1.58884	0.55	0.159	0	Myeloid	LIPA
0	1.5828	0.568	0.005	0	Myeloid	CSF1R
0	1.57661	0.603	0.243	0	Myeloid	CAPG
0	1.55371	0.595	0.073	0	Myeloid	NFKBID
0	1.54833	0.574	0.149	0	Myeloid	NFKB1
0	1.5317	0.673	0.237	0	Myeloid	CD44
0	1.50624	0.43	0.005	0	Myeloid	FCGR2B
0	1.50263	0.507	0.025	0	Myeloid	LCP2
0	1.48447	0.558	0.005	0	Myeloid	CLEC7A
0	1.48393	0.642	0.155	0	Myeloid	FGL2
0	1.48024	0.473	0.118	0	Myeloid	HBEGF
0	1.47352	0.566	0.006	0	Myeloid	LY86
0	1.47006	0.483	0.143	0	Myeloid	THAP2
0	1.45382	0.406	0.038	0	Myeloid	STAB1
0	1.45009	0.813	0.391	0	Myeloid	ARPC1B
0	1.44847	0.431	0.004	0	Myeloid	CD163
0	1.44801	0.59	0.145	0	Myeloid	RILPL2
0	1.4463	0.565	0.004	0	Myeloid	CD86
0	1.44474	0.502	0.131	0	Myeloid	TNFAIP8
0	1.43029	0.728	0.321	0	Myeloid	METRNL
0	1.42985	0.51	0.141	0	Myeloid	PPIF
0	1.40766	0.431	0.004	0	Myeloid	VSIG4
0	1.40592	0.546	0.008	0	Myeloid	RNASE6
0	1.38748	0.582	0.064	0	Myeloid	TNFRSF1B
0	1.38428	0.647	0.086	0	Myeloid	HCST
0	1.38299	0.559	0.099	0	Myeloid	ZNF267
0	1.38203	0.505	0.024	0	Myeloid	ADAP2
0	1.38122	0.453	0.004	0	Myeloid	FCGR1A
0	1.37736	0.651	0.073	0	Myeloid	CD37
0	1.37563	0.907	0.531	0	Myeloid	HLA-B
0	1.37211	0.46	0.011	0	Myeloid	CCRL2
0	1.36791	0.536	0.031	0	Myeloid	STX11
0	1.36764	0.655	0.283	0	Myeloid	PIM3
0	1.34943	0.695	0.327	0	Myeloid	CREM
0	1.34101	0.6	0.057	0	Myeloid	LCP1
0	1.34088	0.55	0.064	0	Myeloid	LY96
0	1.33358	0.647	0.203	0	Myeloid	PYCARD
0	1.33222	0.597	0.057	0	Myeloid	FYB1
0	1.33178	0.588	0.085	0	Myeloid	PTPRE
0	1.33045	0.577	0.131	0	Myeloid	MAP3K8
0	1.31291	0.8	0.225	0	Myeloid	ARHGDIB
0	1.31193	0.469	0.13	0	Myeloid	ABL2
0	1.30582	0.422	0.009	0	Myeloid	IFI30
0	1.30189	0.449	0.07	0	Myeloid	BIRC3
0	1.29678	0.527	0.156	0	Myeloid	ZNF331
0	1.29039	0.64	0.053	0	Myeloid	CD53
0	1.27292	0.617	0.198	0	Myeloid	CTSH
0	1.26996	0.482	0.005	0	Myeloid	ITGAX
0	1.26539	0.486	0.021	0	Myeloid	IL18
0	1.26245	0.588	0.063	0	Myeloid	HCLS1
0	1.22046	0.62	0.125	0	Myeloid	GLIPR1
0	1.22021	0.514	0.058	0	Myeloid	SAMSN1
0	1.2177	0.508	0.037	0	Myeloid	SERPINA1
0	1.21006	0.512	0.077	0	Myeloid	OGFRL1
0	1.20808	0.549	0.136	0	Myeloid	CARD16
0	1.20144	0.534	0.135	0	Myeloid	LSP1
0	1.19286	0.558	0.145	0	Myeloid	MAP2K3
0	1.19046	0.573	0.204	0	Myeloid	SERPINB1
0	1.18805	0.558	0.126	0	Myeloid	PDE4B
0	1.18216	0.484	0.031	0	Myeloid	CALHM6
0	1.16475	0.569	0.097	0	Myeloid	ARRB2
0	1.15125	0.474	0.03	0	Myeloid	TNFSF13B
0	1.13832	0.431	0.09	0	Myeloid	ATP2B1-AS1
0	1.13157	0.523	0.029	0	Myeloid	IL10RA
0	1.12945	0.467	0.122	0	Myeloid	TNFAIP2
0	1.12554	0.716	0.328	0	Myeloid	FXYD5
0	1.1171	0.552	0.174	0	Myeloid	SAMHD1
0	1.11011	0.459	0.123	0	Myeloid	LTC4S
0	1.10631	0.531	0.124	0	Myeloid	GNA13
0	1.09883	0.435	0.004	0	Myeloid	FPR1
0	1.09867	0.416	0.003	0	Myeloid	MPEG1
0	1.09225	0.613	0.241	0	Myeloid	PLSCR1
0	1.08838	0.543	0.172	0	Myeloid	MFSD1
0	1.0821	0.501	0.101	0	Myeloid	UCP2
0	1.07364	0.495	0.058	0	Myeloid	CD4
0	1.06616	0.584	0.095	0	Myeloid	CORO1A
0	1.05723	0.552	0.161	0	Myeloid	TPP1
0	1.0426	0.593	0.201	0	Myeloid	CLEC2B
0	1.03691	0.432	0.089	0	Myeloid	ELL2
0	1.03609	0.469	0.112	0	Myeloid	PFKFB3
0	1.00929	0.434	0.037	0	Myeloid	RAB20
0	1.00546	0.435	0.008	0	Myeloid	PILRA
1.10675e-307	1.2068	0.702	0.378	2.4603e-303	Myeloid	RNF130
[truncated: 607 more rows]

## Sheet: supplementary table S2
cell types	markers	references (DOI)
Airway Epi/ciliated cells	C20orf85, CDHR3, FOXJ1	10.1016/j.cell.2020.10.018; 10.1164/rccm.201904-0792OC
Retinal Epi/ciliated cells	OTX2, MITF, TTR	10.1016/j.cell.2020.10.019; 10.1164/rccm.201904-0792OC
Mid/Hindgut Epi	PHGR1, ELF3, CDX2	10.1016/j.cell.2020.10.019; 10.1186/s12876-018-0752-8
Foregut Epi	KRT13, PAX9, KRT4	10.1016/j.cell.2020.10.019; 10.1016/j.celrep.2021.108819
epithelial	EPCAM, KRT18	10.1016/j.celrep.2019.09.088
schwann cells	MPZ, S100B, PLP1	10.1016/j.gendis.2021.12.020
pericytes	RGS5, ACTA2, TAGLN	10.1016/j.gendis.2021.12.020
MSC/Fib	COL14A1, DCN, LUM	10.1016/j.cell.2020.10.019; 10.1016/j.gendis.2021.12.020
Chondrogenic MSC/Fibro	COL2A1, C2orf40	10.1016/j.gene.2009.08.015; 10.1016/j.cell.2020.10.019
meningeal fibroblast	ZIC1, CXCL12, GJA1	10.1016/j.devcel.2020.06.009
cardiomyocyte/myoFib	PITX2, KDR, COL15A1	10.1016/j.stem.2018.09.009; 10.1016/j.cell.2020.10.019
myogenic progenitor cells	TCF21, PEG3	10.1371/journal.pone.0083359; 10.3389/fcell.2020.00457
smooth muscle cells	MYH11, CNN1	10.1172/jci.insight.140604
Adipogenic MSC/Fib	ITM2A, SHOX2	10.1016/j.cell.2020.10.019
adipocyte	LPL, CFD, PPARG	10.1038/cddis.2013.338
embryonic stem cell	HMGA1, HMGA2	10.3390/ijms21010362
stem cell like	KLF4	10.1038/onc.2010.591
Cycling Neural Prog/MSC	TOP2A, HMGB2	10.1016/j.cell.2020.10.019
Radial Glia	SOX2, VIM, HES5	10.1016/j.cell.2020.10.019
immature neuron	STMN2, DCX, MAP2	10.1038/s41422-022-00678-y; 10.1016/j.cell.2020.10.019
endothelial	CD34, CLEC14A, VWF, PECAM1	10.1016/j.celrep.2019.09.088
Lymphatics endothelial cells	PROX1, MMRN1, CCL21	10.1016/j.cell.2019.08.008
Myeloid	CST3, LYZ, CD68	10.1038/s41467-022-28372-y
Neutrophils	FCGR3B, CSF3R, CXCR2	10.1016/j.ccell.2021.04.014
pDC	CLEC4C, IL3RA, LILRA4	10.1016/j.cell.2020.03.048
B cells	CD79A, CD37, MS4A1	10.1016/j.ccell.2021.04.014
T cells	CD3E, CD3D, CD3G	10.1016/j.ccell.2021.04.014
NKT cells	KLRD1, KLRB1	10.1038/jid.2009.30

## Sheet: supplementary table S3
	Supplementary Table 3: Information of CDT samples used in this study
	Sample ID	Major Neural Cell Type Counts			Cell Lines Used to Generate CDTs	Reference
		Radial Glia	Immature Neuron	Cycling Neural Progenitor
	ter1	268	225	83	H1 human embryonic stem cells	https://doi.org/10.1016/j.cell.2020.10.018
	ter2	86	231	43	H1 human embryonic stem cells	https://doi.org/10.1016/j.cell.2020.10.018
	ter3	156	72	75	H1 human embryonic stem cells	https://doi.org/10.1016/j.cell.2020.10.018
	ter4	232	226	149	H1 human embryonic stem cells	https://doi.org/10.1016/j.cell.2020.10.018
	ter5	99	62	59	H1 human embryonic stem cells	https://doi.org/10.1016/j.cell.2020.10.018
	ter6	251	229	191	H1 human embryonic stem cells	https://doi.org/10.1016/j.cell.2020.10.018
	ter7	129	197	97	H1 human embryonic stem cells	https://doi.org/10.1016/j.cell.2020.10.018
	H9	279	1937	102	H9 human embryonic stem cells	https://doi.org/10.1016/j.cell.2020.10.018
	HUES62	240	806	80	HUES62 Human embryonic stem cells	https://doi.org/10.1016/j.cell.2020.10.018
	PGP1	839	2025	740	PGP1 induced pluripotent stem cells	https://doi.org/10.1016/j.cell.2020.10.018

## Sheet: supplementary table S4
	Supplementary Table 4: Validation cohort: Clinical characteristics of seven patients with immature ovarian teratoma
	Case	Grade	Age (years)	AFP (ng/ml)	Laterality	Tumor size	Surgery	Prognosis
	PDT04	3	34	4.3 (post surgery)	Right	8.8 x 7 x 5.6cm	Hysterectomy	EFS 2 years
	PDT05	3	22	12.7	Right	7 x 7 x 2.3cm	Unilateral Adnexectomy	EFS 2 years
	PDT06	2	30	379.5	Left	18 x 11 x 8 cm	NA	EFS 2.5 years
	PDT08	2	31	5 (post surgery)	Left	8.5 x 8 x 2cm	NA	EFS 2.5 years
	PDT09	1	23	<1.3 (post surgery)	Right	11.5 x 7 x 7cm	NA	EFS 3 years
	PDT10	2	26	5.4	Left	5.5 x 4.5 x 2cm	Tumor Enucleation	NMDAR encephalitis
	PDT11	2	27	NA	Left	11 x 8.5 x 3cm	NA	EFS 3 years
	EFS, event free survival; AFP, α-Fetoprotein; NMDAR, N-methyl-D-aspartate receptors

## Sheet: supplementary table S5
	A1CF(+)	ALX1(+)	ALX3(+)	ARID3A(+)	ARNT(+)	ARX(+)	ASCL2(+)	ATF1(+)	ATF2(+)	ATF3(+)	ATF4(+)	ATF5(+)	ATF6(+)	ATF6B(+)	ATF7(+)	ATOH1(+)	ATOH7(+)	BACH1(+)	BACH2(+)	BARHL1(+)	BATF(+)	BBX(+)	BCL11A(+)	BCL3(+)	BCL6(+)	BCL6B(+)	BCLAF1(+)	BDP1(+)	BHLHE22(+)	BHLHE40(+)	BORCS8-MEF2B(+)	BPTF(+)	BRCA1(+)	BRF1(+)	BRF2(+)	CDX1(+)	CDX2(+)	CDX4(+)	CEBPA(+)	CEBPB(+)	CEBPD(+)	CEBPE(+)	CEBPG(+)	CEBPZ(+)	CHD1(+)	CHD2(+)	CREB1(+)	CREB3(+)	CREB3L1(+)
Myeloid	0.307636	0.205532	0.197328	0.299102	0.181456	0.226813	0.347364	0.233669	0.221164	0.268365	0.250417	0.467987	0.268805	0.241463	0.182848	0.245523	0.213413	0.305124	0.241848	0.23535	0.296874	0.235583	0.183356	0.311941	0.34212	0.205606	0.238889	0.23794	0.175766	0.31237	0.220163	0.2328	0.23352	0.21981	0.232713	0.266924	0.257186	0.279671	0.269233	0.282788	0.268544	0.59138	0.254633	0.24051	0.256135	0.257663	0.244571	0.232546	0.218546
Neutrophils	0.195804	0.173521	0.171654	0.178792	0.167975	0.173302	0.177523	0.17155	0.173086	0.171827	0.171059	0.179404	0.172712	0.190587	0.168	0.195674	0.189052	0.17703	0.176531	0.175584	0.179785	0.171735	0.171749	0.177664	0.178429	0.170706	0.171492	0.171783	0.16906	0.174544	0.180335	0.171959	0.171294	0.170667	0.173145	0.175224	0.178794	0.179354	0.171852	0.17286	0.172171	0.191796	0.172991	0.171033	0.177415	0.173245	0.172848	0.169744	0.17029
B cells	0.16932	0.168171	0.16776	0.171815	0.168108	0.169049	0.176568	0.170839	0.171736	0.170685	0.171294	0.174271	0.171752	0.171527	0.167818	0.170165	0.168106	0.172338	0.172832	0.170262	0.171561	0.17059	0.168656	0.172517	0.172422	0.168349	0.171636	0.17218	0.167855	0.172126	0.170631	0.17172	0.170991	0.172028	0.171024	0.171289	0.170477	0.171643	0.169839	0.170741	0.170445	0.174833	0.172375	0.172038	0.172944	0.173418	0.171764	0.170085	0.169044
pDC	0.167487	0.16844	0.167505	0.169619	0.167445	0.167698	0.173613	0.168914	0.168661	0.169163	0.169382	0.172948	0.169702	0.169293	0.167445	0.168004	0.167989	0.17001	0.169316	0.169468	0.169503	0.169845	0.169344	0.170307	0.171173	0.16849	0.169328	0.169412	0.167962	0.170602	0.168417	0.169208	0.169013	0.169988	0.168406	0.169346	0.168648	0.170161	0.168386	0.169272	0.169031	0.171308	0.169271	0.169284	0.170357	0.17024	0.169392	0.168759	0.16839
NKT cells	0.170666	0.170887	0.169344	0.192017	0.173572	0.180936	0.193413	0.187823	0.198307	0.18592	0.188642	0.194506	0.191474	0.184065	0.175137	0.178531	0.175163	0.193631	0.19121	0.180852	0.235218	0.186813	0.173913	0.198653	0.191419	0.170962	0.192355	0.19345	0.17385	0.198913	0.178113	0.192204	0.189756	0.19155	0.193056	0.189708	0.182221	0.189157	0.181952	0.187476	0.184869	0.189768	0.193429	0.196294	0.191484	0.201341	0.193185	0.18687	0.179069
T cells	0.179489	0.181157	0.17569	0.234557	0.178873	0.194944	0.246879	0.219623	0.243399	0.220124	0.228614	0.238939	0.229564	0.226952	0.184995	0.213127	0.197936	0.236309	0.236966	0.208355	0.370341	0.218213	0.185685	0.252641	0.234818	0.179949	0.23471	0.238215	0.177328	0.248802	0.209602	0.233464	0.228962	0.230657	0.227473	0.230906	0.21649	0.227261	0.210907	0.223562	0.217117	0.21822	0.240298	0.242502	0.235909	0.260578	0.234534	0.213135	0.200744
T cells(cell cycle)	0.168085	0.167675	0.167529	0.169298	0.167502	0.168329	0.169455	0.169897	0.170411	0.169409	0.169771	0.170003	0.169451	0.167899	0.167445	0.168416	0.168325	0.169688	0.169837	0.168833	0.174099	0.168435	0.167852	0.170711	0.169364	0.167448	0.170003	0.170031	0.167729	0.170348	0.168393	0.169435	0.173452	0.168741	0.170409	0.169605	0.168697	0.168419	0.168832	0.169662	0.169326	0.169747	0.170384	0.171593	0.170661	0.170489	0.169817	0.169608	0.168634
endothelial	0.171667	0.193397	0.18684	0.224131	0.187629	0.220523	0.185521	0.213354	0.211751	0.210644	0.215436	0.21161	0.242571	0.257425	0.214864	0.210139	0.197132	0.221802	0.197879	0.208806	0.194218	0.203817	0.200477	0.217332	0.204205	0.500897	0.218046	0.224497	0.185555	0.220792	0.22678	0.221694	0.217039	0.235428	0.212277	0.218037	0.207312	0.218301	0.202004	0.213374	0.214641	0.173465	0.213605	0.213977	0.210254	0.218391	0.222804	0.214633	0.213496
Lymphatics endothelial cells	0.168077	0.174294	0.17518	0.184258	0.17347	0.18772	0.173183	0.182331	0.179658	0.18119	0.182557	0.181015	0.19737	0.185576	0.184798	0.176161	0.171716	0.184769	0.178491	0.178873	0.175353	0.181634	0.182037	0.181627	0.178083	0.256701	0.183129	0.184899	0.172729	0.183868	0.184814	0.184658	0.183732	0.18665	0.182266	0.185956	0.18106	0.181738	0.179432	0.182616	0.183029	0.169408	0.181958	0.181226	0.178267	0.183313	0.184139	0.185807	0.182425
meningeal fibroblast	0.168862	0.191945	0.186725	0.184003	0.181185	0.189833	0.170813	0.19423	0.176925	0.19419	0.191198	0.18711	0.187261	0.174829	0.18905	0.174622	0.173659	0.185862	0.184374	0.190091	0.171768	0.178092	0.181712	0.190619	0.18968	0.184354	0.185982	0.182352	0.173934	0.192495	0.17372	0.181839	0.186367	0.178929	0.18661	0.19033	0.188033	0.191924	0.18989	0.195261	0.195895	0.168672	0.191758	0.185171	0.181173	0.182844	0.183436	0.193513	0.197641
MSC/Fib	0.177423	0.396661	0.398131	0.289164	0.353429	0.339227	0.227218	0.334698	0.281642	0.346859	0.336503	0.268012	0.316578	0.231276	0.300931	0.20801	0.216471	0.310894	0.287972	0.277778	0.191337	0.255697	0.3106	0.313831	0.300165	0.220063	0.325787	0.318393	0.2165	0.316817	0.220848	0.324932	0.310522	0.306788	0.293684	0.301242	0.283034	0.262968	0.347321	0.340281	0.345538	0.175153	0.312722	0.310795	0.29318	0.317932	0.312569	0.312489	0.375797
epithelial	0.203048	0.196912	0.189566	0.241994	0.186699	0.198184	0.324236	0.217189	0.204081	0.207671	0.21131	0.206871	0.209921	0.20975	0.18903	0.228277	0.208421	0.205616	0.195119	0.202282	0.183029	0.203885	0.209201	0.208314	0.21519	0.178589	0.209562	0.207124	0.175611	0.209146	0.21074	0.204664	0.214285	0.20702	0.214925	0.239485	0.254232	0.256852	0.210313	0.208117	0.20933	0.181099	0.213425	0.211418	0.201886	0.208123	0.208488	0.206729	0.203477
myogenic progenitor cells	0.172572	0.181587	0.205702	0.186088	0.208428	0.263229	0.172365	0.194399	0.184628	0.19698	0.193719	0.183489	0.193453	0.186085	0.184536	0.18022	0.184036	0.189082	0.180859	0.192056	0.171419	0.180714	0.188646	0.191193	0.184799	0.187295	0.191394	0.188316	0.182451	0.189974	0.19276	0.188695	0.191714	0.188389	0.193061	0.19532	0.195315	0.187288	0.19656	0.198191	0.199704	0.169364	0.18941	0.190441	0.184186	0.186592	0.189875	0.207302	0.205698
immature neuron	0.181023	0.223081	0.201089	0.240919	0.208652	0.240334	0.188078	0.247244	0.296892	0.220937	0.246879	0.21357	0.262578	0.236141	0.206406	0.278204	0.345995	0.254151	0.370226	0.387201	0.180617	0.211492	0.373759	0.213218	0.210338	0.184695	0.273616	0.277158	0.565726	0.215274	0.238622	0.273372	0.264184	0.286519	0.304558	0.226177	0.242029	0.256623	0.208468	0.21449	0.213447	0.172617	0.280056	0.276615	0.262703	0.262368	0.295016	0.263087	0.212496
Adipogenic MSC/Fib	0.174358	0.387078	0.409178	0.297097	0.372091	0.337747	0.241297	0.357615	0.289491	0.376679	0.360174	0.280587	0.327685	0.216943	0.323002	0.205297	0.21069	0.327051	0.304567	0.309454	0.210394	0.257485	0.323565	0.343609	0.329686	0.232306	0.343852	0.332259	0.218008	0.348278	0.216803	0.336011	0.326574	0.307213	0.314448	0.322644	0.301159	0.264857	0.408802	0.371411	0.376286	0.174332	0.330342	0.328929	0.308099	0.332342	0.325111	0.319132	0.400998
Chondrogenic MSC/Fibro	0.169504	0.207754	0.193165	0.185029	0.189939	0.186	0.17981	0.189476	0.186493	0.186353	0.186633	0.179185	0.185406	0.182563	0.18745	0.175189	0.175648	0.183049	0.182232	0.179453	0.170904	0.186972	0.183272	0.182605	0.18026	0.173781	0.186832	0.186898	0.171816	0.183234	0.175957	0.187626	0.186967	0.187033	0.186254	0.185362	0.187617	0.184617	0.189124	0.186424	0.186836	0.168704	0.185128	0.187055	0.183507	0.185817	0.185961	0.186641	0.189399
Radial Glia	0.17096	0.202795	0.187239	0.203031	0.186782	0.200809	0.172732	0.216259	0.219227	0.200569	0.212257	0.194567	0.216235	0.183782	0.193267	0.203732	0.215652	0.209747	0.227152	0.22115	0.173512	0.204411	0.226068	0.194579	0.193714	0.176769	0.222326	0.222815	0.238172	0.197134	0.184427	0.219663	0.230397	0.219507	0.232276	0.199677	0.206183	0.212323	0.193277	0.197285	0.197877	0.170877	0.227834	0.22971	0.218645	0.216088	0.223598	0.20891	0.195451
pericytes	0.175645	0.242936	0.217616	0.252237	0.23483	0.249713	0.181855	0.253526	0.249362	0.264022	0.261224	0.22962	0.253909	0.219498	0.258922	0.207462	0.196138	0.261988	0.215927	0.240366	0.193589	0.225579	0.228955	0.271513	0.265373	0.246578	0.260281	0.262353	0.179239	0.257365	0.386017	0.259542	0.25928	0.258719	0.263389	0.272402	0.240109	0.234826	0.233235	0.265037	0.268332	0.174993	0.245026	0.250915	0.236411	0.253941	0.264749	0.244435	0.261654
schwann cells	0.171303	0.185733	0.193178	0.195532	0.206076	0.186852	0.171391	0.199077	0.194477	0.193866	0.194921	0.187873	0.198171	0.185248	0.208645	0.182359	0.180424	0.201903	0.195369	0.196073	0.190398	0.189315	0.189953	0.194144	0.198922	0.186592	0.195354	0.194879	0.209157	0.196974	0.197878	0.195265	0.196818	0.193977	0.199123	0.193914	0.189026	0.186878	0.192871	0.194828	0.195136	0.171852	0.196401	0.194047	0.191264	0.192642	0.198106	0.199663	0.193306
cardiomyocyte/myoFib	0.1681	0.194164	0.212036	0.187586	0.188212	0.196345	0.176354	0.190168	0.182657	0.191978	0.19047	0.181836	0.19062	0.176716	0.181078	0.173192	0.172513	0.186724	0.177996	0.185136	0.169811	0.179613	0.182571	0.188225	0.186642	0.181755	0.187594	0.1859	0.174709	0.187685	0.183445	0.184777	0.185302	0.18432	0.182014	0.18979	0.187426	0.203642	0.192263	0.192157	0.192949	0.168742	0.185066	0.18407	0.180267	0.184834	0.185752	0.193955	0.200858
Cycling Neural Prog/MSC	0.169525	0.204411	0.199962	0.19886	0.195793	0.20209	0.183893	0.218979	0.215318	0.209071	0.213246	0.193034	0.207857	0.17602	0.188497	0.194209	0.190836	0.204195	0.210027	0.209802	0.174245	0.196557	0.215344	0.203672	0.200229	0.179114	0.218623	0.215776	0.195367	0.201887	0.183673	0.212816	0.272774	0.200898	0.215104	0.200605	0.196686	0.193145	0.201229	0.20656	0.206621	0.169635	0.216926	0.222849	0.223851	0.210758	0.214531	0.205871	0.20575
embryonic stem cell	0.170912	0.216132	0.23089	0.20289	0.207338	0.196556	0.176216	0.211556	0.211552	0.202594	0.209757	0.187645	0.207303	0.189604	0.210765	0.179302	0.186532	0.205938	0.203683	0.194243	0.174603	0.199244	0.21513	0.1966	0.198867	0.180255	0.214203	0.216339	0.177927	0.19544	0.179245	0.214276	0.2098	0.2159	0.206929	0.199121	0.189473	0.206063	0.19832	0.199098	0.200308	0.171184	0.205739	0.213066	0.207861	0.212543	0.214253	0.198896	0.205519
adipocyte	0.167445	0.18486	0.189818	0.17846	0.179273	0.175221	0.180353	0.181696	0.17668	0.180765	0.180283	0.17635	0.178574	0.174604	0.18341	0.170226	0.174055	0.178523	0.175427	0.175447	0.171531	0.183669	0.177321	0.179274	0.179845	0.170299	0.179937	0.179615	0.170151	0.178923	0.172418	0.181232	0.179359	0.179845	0.17966	0.180063	0.180402	0.176712	0.187924	0.180692	0.181244	0.169453	0.179179	0.180206	0.179424	0.179679	0.179188	0.178205	0.180792
Airway Epi/ciliated cells	0.180751	0.176954	0.174415	0.195269	0.171491	0.17709	0.195191	0.18732	0.179387	0.181989	0.182091	0.182975	0.182282	0.197943	0.171955	0.20021	0.187774	0.180684	0.176784	0.182652	0.172013	0.180598	0.180316	0.182212	0.182485	0.174043	0.182967	0.180413	0.171105	0.181536	0.186927	0.180202	0.186606	0.179766	0.194644	0.197112	0.208461	0.200564	0.182449	0.182709	0.182856	0.178441	0.186964	0.189048	0.175535	0.181494	0.183536	0.18053	0.180087
Mid/Hindgut Epi	0.449677	0.179527	0.176188	0.254415	0.175951	0.177624	0.217749	0.189074	0.18333	0.187819	0.188499	0.189173	0.187062	0.197167	0.172291	0.269246	0.184805	0.187643	0.186306	0.189356	0.176558	0.182756	0.179647	0.190762	0.191407	0.172782	0.186291	0.185243	0.170294	0.190996	0.200246	0.184095	0.186853	0.183357	0.186122	0.254315	0.2936	0.215372	0.199358	0.187244	0.187023	0.17782	0.205007	0.187785	0.186276	0.187374	0.185453	0.185679	0.18413
Retinal Epi/ciliated cells	0.171591	0.17783	0.179995	0.181286	0.172974	0.179797	0.173002	0.183971	0.180498	0.179368	0.180442	0.177544	0.180628	0.187383	0.176722	0.185127	0.182965	0.17849	0.175922	0.179699	0.170518	0.184308	0.17381	0.178322	0.177075	0.187781	0.180834	0.178003	0.181474	0.178257	0.181554	0.177926	0.183649	0.179042	0.189466	0.184399	0.194379	0.191461	0.181144	0.180062	0.180361	0.175817	0.184065	0.184366	0.174315	0.177851	0.181353	0.184872	0.179597
stem cell like	0.169421	0.190075	0.1879	0.183119	0.183729	0.179934	0.173396	0.183843	0.183781	0.184183	0.184719	0.178281	0.180999	0.182695	0.183959	0.178269	0.179824	0.182585	0.18218	0.180371	0.17099	0.178776	0.184383	0.182252	0.184818	0.17168	0.184091	0.184958	0.17269	0.183223	0.176946	0.185882	0.181576	0.186663	0.180159	0.179845	0.179601	0.18064	0.184317	0.18287	0.183425	0.171342	0.182379	0.182344	0.186076	0.186101	0.182877	0.179384	0.182671
smooth muscle cells	0.167947	0.178344	0.183686	0.176659	0.191869	0.186052	0.171651	0.181744	0.177807	0.180795	0.181288	0.17391	0.178734	0.172512	0.174498	0.170518	0.171796	0.178362	0.177764	0.177467	0.180463	0.175503	0.180259	0.178306	0.17879	0.170059	0.180143	0.179401	0.172435	0.177664	0.183331	0.179169	0.180189	0.178821	0.18156	0.179117	0.179463	0.176648	0.179301	0.180641	0.181495	0.168619	0.17997	0.180317	0.176	0.17847	0.179443	0.180075	0.181782
Foregut Epi	0.174636	0.172027	0.169885	0.182792	0.168389	0.173407	0.203817	0.176705	0.173897	0.175277	0.176148	0.179074	0.176721	0.177284	0.172916	0.181765	0.174781	0.178861	0.172769	0.178242	0.184771	0.170929	0.171865	0.177715	0.178075	0.168768	0.175499	0.17422	0.168692	0.178137	0.173585	0.175259	0.174639	0.176076	0.175217	0.184687	0.188519	0.184237	0.174249	0.175698	0.175382	0.195152	0.178634	0.175955	0.170799	0.176816	0.176973	0.173617	0.173784
[truncated: 534 more columns]
